# Supplementary material for: Identification of the most vulnerable populations in the psychosocial sphere: a cross-sectional study conducted in Catalonia during the strict lockdown imposed against the COVID-19 pandemic
Source: PubMed Central journal article supplement — BMJ Open. 2021 Nov 26;11(11):e052140. doi: 10.1136/bmjopen-2021-052140 (PMC8628111; doi:10.1136/bmjopen-2021-052140), 2021-11-26
Supplement: bmjopen-2021-052140.draft_revisions.pdf [file bmjopen-2021-052140.draft_revisions.pdf]

# BMJ Open

BMJ Open is committed to open peer review. As part of this commitment we make the peer review history of every article we publish publicly available.

When an article is published we post the peer reviewers' comments and the authors' responses online. We also post the versions of the paper that were used during peer review. These are the versions that the peer review comments apply to.

The versions of the paper that follow are the versions that were submitted during the peer review process. They are not the versions of record or the final published versions. They should not be cited or distributed as the published version of this manuscript.

BMJ Open is an open access journal and the full, final, typeset and author-corrected version of record of the manuscript is available on our site with no access controls, subscription charges or pay-per-view fees (<http://bmjopen.bmj.com>).

If you have any questions on BMJ Open's open peer review process please email [info.bmjopen@bmj.com](mailto:info.bmjopen@bmj.com)

# BMJ Open

## Psychosocial impact of the Covid-19 pandemic: Identification of most vulnerable populations in a cross-sectional study.

|                               |                                                                                                                                                                                                                                                                                                                                                                                                                                                                                                                                                                                                                                                                                                                                                                                                                                                                                                                                                                                                                                                                                                                                                                                                                                                                                                                                                                                                                                                                                                                                                                                                                                         |
|-------------------------------|-----------------------------------------------------------------------------------------------------------------------------------------------------------------------------------------------------------------------------------------------------------------------------------------------------------------------------------------------------------------------------------------------------------------------------------------------------------------------------------------------------------------------------------------------------------------------------------------------------------------------------------------------------------------------------------------------------------------------------------------------------------------------------------------------------------------------------------------------------------------------------------------------------------------------------------------------------------------------------------------------------------------------------------------------------------------------------------------------------------------------------------------------------------------------------------------------------------------------------------------------------------------------------------------------------------------------------------------------------------------------------------------------------------------------------------------------------------------------------------------------------------------------------------------------------------------------------------------------------------------------------------------|
| Journal:                      | <i>BMJ Open</i>                                                                                                                                                                                                                                                                                                                                                                                                                                                                                                                                                                                                                                                                                                                                                                                                                                                                                                                                                                                                                                                                                                                                                                                                                                                                                                                                                                                                                                                                                                                                                                                                                         |
| Manuscript ID                 | bmjopen-2021-052140                                                                                                                                                                                                                                                                                                                                                                                                                                                                                                                                                                                                                                                                                                                                                                                                                                                                                                                                                                                                                                                                                                                                                                                                                                                                                                                                                                                                                                                                                                                                                                                                                     |
| Article Type:                 | Original research                                                                                                                                                                                                                                                                                                                                                                                                                                                                                                                                                                                                                                                                                                                                                                                                                                                                                                                                                                                                                                                                                                                                                                                                                                                                                                                                                                                                                                                                                                                                                                                                                       |
| Date Submitted by the Author: | 07-Apr-2021                                                                                                                                                                                                                                                                                                                                                                                                                                                                                                                                                                                                                                                                                                                                                                                                                                                                                                                                                                                                                                                                                                                                                                                                                                                                                                                                                                                                                                                                                                                                                                                                                             |
| Complete List of Authors:     | <p>Farres, Judith; Anaxomics Biotech SL Systems Biology Solutions<br/> Ruiz, Jose Luis; Anaxomics Biotech SL Systems Biology Solutions<br/> Mas, Jose Manuel; Anaxomics Biotech SL Systems Biology Solutions<br/> Arias, Lilibeth; Fundació Institut d'Investigació en Ciències de la Salut<br/> Germans Trias i Pujol, Experimental Tuberculosis Unit; CIBERES<br/> Sarrias, Maria-Rosa; Fundació Institut d'Investigació en Ciències de la<br/> Salut Germans Trias i Pujol, Innate Immunity Group; CIBEREHD<br/> Armengol, Carolina; Fundació Institut d'Investigació en Ciències de la<br/> Salut Germans Trias i Pujol, Childhood Liver Oncology Group; CIBEREHD<br/> Cardona, Pere-Joan; Fundació Institut d'Investigació en Ciències de la<br/> Salut Germans Trias i Pujol, Experimental Tuberculosis Unit. ; CIBERES<br/> Munoz-Moreno, Jose A; Fundació Lluita Contra la Sida, Servei de<br/> Malalties Infeccioses, Hospital Germans Trias; Universitat Oberta de<br/> Catalunya, Facultat de Psicologia i Ciències de l'Educació<br/> Vilaplana, Miriam; Parc Sanitari Sant Joan de Deu<br/> Arranz, Belen; Parc Sanitari Sant Joan de Deu, Institut de Recerca Sant<br/> Joan de Deu; CIBERSAM<br/> Usall, Judith; Parc Sanitari Sant Joan de Deu, Institut de Recerca Sant<br/> Joan de Deu<br/> Serrano-Blanco, Antoni; Parc Sanitari Sant Joan de Deu, Institut de<br/> Recerca Sant Joan de Deu; CIBERESP<br/> Vilaplana, Cristina; Fundació Institut d'Investigació en Ciències de la<br/> Salut Germans Trias i Pujol, Unitat de Tuberculosi Experimental.<br/> Universitat Autònoma de Barcelona (UAB); CIBERES</p> |
| Keywords:                     | COVID-19, Health policy < HEALTH SERVICES ADMINISTRATION & MANAGEMENT, Public health < INFECTIOUS DISEASES                                                                                                                                                                                                                                                                                                                                                                                                                                                                                                                                                                                                                                                                                                                                                                                                                                                                                                                                                                                                                                                                                                                                                                                                                                                                                                                                                                                                                                                                                                                              |
|                               |                                                                                                                                                                                                                                                                                                                                                                                                                                                                                                                                                                                                                                                                                                                                                                                                                                                                                                                                                                                                                                                                                                                                                                                                                                                                                                                                                                                                                                                                                                                                                                                                                                         |

SCHOLARONE™  
Manuscripts

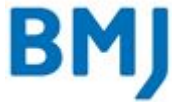

I, the Submitting Author has the right to grant and does grant on behalf of all authors of the Work (as defined in the below author licence), an exclusive licence and/or a non-exclusive licence for contributions from authors who are: i) UK Crown employees; ii) where BMJ has agreed a CC-BY licence shall apply, and/or iii) in accordance with the terms applicable for US Federal Government officers or employees acting as part of their official duties; on a worldwide, perpetual, irrevocable, royalty-free basis to BMJ Publishing Group Ltd ("BMJ") its licensees and where the relevant Journal is co-owned by BMJ to the co-owners of the Journal, to publish the Work in this journal and any other BMJ products and to exploit all rights, as set out in our [licence](#).

The Submitting Author accepts and understands that any supply made under these terms is made by BMJ to the Submitting Author unless you are acting as an employee on behalf of your employer or a postgraduate student of an affiliated institution which is paying any applicable article publishing charge ("APC") for Open Access articles. Where the Submitting Author wishes to make the Work available on an Open Access basis (and intends to pay the relevant APC), the terms of reuse of such Open Access shall be governed by a Creative Commons licence – details of these licences and which [Creative Commons](#) licence will apply to this Work are set out in our licence referred to above.

Other than as permitted in any relevant BMJ Author's Self Archiving Policies, I confirm this Work has not been accepted for publication elsewhere, is not being considered for publication elsewhere and does not duplicate material already published. I confirm all authors consent to publication of this Work and authorise the granting of this licence.

1  
2  
3  
4  
5  
6  
7  
8  
9  
10  
11  
12  
13  
14  
15  
16  
17  
18  
19  
20  
21  
22  
23  
24  
25  
26  
27  
28  
29  
30  
31  
32  
33  
34  
35  
36  
37  
38  
39  
40  
41  
42  
43  
44  
45  
46  
47  
48  
49  
50  
51  
52  
53  
54  
55  
56  
57  
58  
59  
60

## Psychosocial impact of the Covid-19 pandemic: Identification of most vulnerable populations in a cross-sectional study.

Judith Farrés<sup>1</sup>, José Luis Ruiz<sup>1</sup>, José Manuel Mas<sup>1</sup>, Lilibeth Arias<sup>2,3</sup>, Maria-Rosa Sarrias<sup>4,5</sup>, Carolina Armengol<sup>5,6</sup>, Pere-Joan Cardona<sup>2,3</sup>, José A. Muñoz-Moreno<sup>7,8</sup>, Miriam Vilaplana<sup>9</sup>, Belén Arranz<sup>9,10,11</sup>, Judith Usall<sup>9,11</sup>, Antoni Serrano-Blanco<sup>9,11,12</sup>, Cristina Vilaplana<sup>2,3,\*</sup>

1. Anaxomics Biotech SL. C/ Diputació, 237, 1r 1a, 08007 Barcelona.
2. Experimental Tuberculosis Unit (UTE). Fundació Institut Germans Trias i Pujol (IGTP). Universitat Autònoma de Barcelona (UAB). Edifici Mar. Can Ruti Campus. Ctra. de Can Ruti, camí de les Escoles, s/n, 08916 Badalona, Catalunya, Espanya.
3. Centro de Investigación Biomédica en Red de Enfermedades Respiratorias (CIBERES). Av. Monforte de Lemos, 3-5, pavelló 11, planta 0, 28029, Madrid, Espanya.
4. Innate Immunity Group. Fundació Institut Germans Trias i Pujol (IGTP). Can Ruti Campus. Edifici Muntanya. Ctra. de Can Ruti, camí de les Escoles, s/n, 08916 Badalona, Catalunya, Espanya.
5. Centro de Investigación Biomédica en Red de Enfermedades Hepáticas y Digestivas (CIBEREhD). Av. Monforte de Lemos, 3-5, pavelló 11, planta 0, 28029 Madrid, Espanya.
6. Childhood Liver Oncology Group, Germans Trias I Pujol Research Institute (IGTP), Program of Predictive and Personalized Medicine of Cancer (PMPCC), Badalona, Spain
7. Fundació Lluita contra la SIDA (FLS) - Servei de Malalties Infeccioses, Hospital Germans Trias, Badalona.
8. Facultat de Psicologia i Ciències de l'Educació, Universitat Oberta de Catalunya (UOC), Barcelona.
9. Parc Sanitari Sant Joan de Déu. C/Antoni Pujadas, 42, 08830 Sant Boi de Llobregat, Catalunya, Espanya.
10. Centro de Investigación Biomédica en Red de Salud Mental (CIBERSAM). Av. Monforte de Lemos, 3-5, pavelló 11, planta 0, 28029 Madrid, Espanya.
11. Institut de Recerca Sant Joan de Déu. C/ Santa Rosa, 39-57, 3a planta, 08940 Esplugues de Llobregat, Catalunya, Espanya.
12. Centro de Investigación Biomédica en Red de Epidemiología y Salud Pública (CIBERESP). Av. Monforte de Lemos, 3-5, 28029 Madrid, Espanya.

### Corresponding author\*:

Cristina Vilaplana, MD, PhD

ORCID: <https://orcid.org/0000-0002-2808-7270>

Principal Investigator

Fundació Institut Germans Trias i Pujol (IGTP), Experimental Tuberculosis Unit (UTE), Campus Can Ruti. Crtra. de Can Ruti, Camí de les Escoles, s/n.

08916 Badalona, Catalonia, Spain

Telephone: +34 93 033 0527

[cvilaplana@igtp.cat](mailto:cvilaplana@igtp.cat)

## Abstract

Objective: To analyze the impact of first peak of Covid-19 pandemic on a wide range of dimensions of health of general population and health care workers in particular.

Setting: We developed a 74-question survey questionnaire which was shared through social media through using snowball sampling.

Participants: The study population was all people >16 years old consenting to participate in the Project and completing the survey. 56,656 completed survey questionnaires were obtained from the 3<sup>rd</sup> to 19<sup>th</sup> April 2020.

Outcome measures: descriptive statistics for the non-psychological questions and psychological impact of the outbreak as depression, anxiety, stress and PTSD questions scores.

Results showed an early and important negative impact on family finances, fear of working with Covid-19 patients and ethical issues related to Covid-19 care among healthcare workers (HCW). 7 target groups at higher risk of impaired mental health and susceptible to benefiting from an intervention were identified: women, under 42 years of age, people with care burden, socio-economically deprived groups, people with unskilled or unqualified jobs, Covid-19 patients, and HCW working with Covid-19 patients.

Conclusions: Active implementation of specific strategies to increase resilience and to prepare an adequate organizational response should be encouraged for the 7 groups identified as high risk and susceptible to benefit from an intervention.

Study registration: ClinicalTrials.gov identifier (NCT number) NCT04378452.

## Strengths and limitations of this study

- We have studied the impact of Covid-19 first wave on a very large cohort of people, using a total of 56,656 completed survey questionnaires.

- 1  
2  
3  
4  
5  
6  
7  
8  
9  
10  
11  
12  
13  
14  
15  
16  
17  
18  
19  
20  
21  
22  
23  
24  
25  
26  
27  
28  
29  
30  
31  
32  
33  
34  
35  
36  
37  
38  
39  
40  
41  
42  
43  
44  
45  
46  
47  
48  
49  
50  
51  
52  
53  
54  
55  
56  
57  
58  
59  
60
- By using a survey questionnaire including 74 questions we have assessed the impact of the Covid-19 outbreak on a wide range of dimensions of health status.
  - As the survey was disseminated through social media, the sample of population studied could not be controlled but was successfully shared rapidly reaching a large number of people in different settings and different regions, without exposing interviewers to infection.
  - To explore the impact on mental health dimension survey included 41 questions related to depression, anxiety, stress and Post-Traumatic Stress Disorder symptoms but no validated scales were used.
  - Since there were no specific criteria for stratification of some of the categories we divided these categories in the cohort into groups containing a similar sample size.

## 1. Introduction

2 On 30 March 2020, 78,797 confirmed cases of SARS-CoV-2, 6,528 deaths and 14,709  
3 patients who had recovered were reported in Spain [1]; 16,157 cases and 1,410 deaths  
4 were recorded in Catalonia [2]. Case fatality (8%) was calculated for the registered cases,  
5 although the mortality rate was uncertain and the total number of cases (including those  
6 undiagnosed and with mild symptoms) were unknown. At that time, there was local  
7 transmission of SARS-CoV-2 in the community. Everyone with a compatible respiratory  
8 condition was considered likely to be a case of SARS-CoV-2 although the etiological  
9 diagnosis could not be made for all suspected cases in the context of a health emergency  
10 because of the lack of kits and the saturation of the health system [3,4].

11 Other major outbreaks of infectious diseases such as Ebola have demonstrated that there  
12 is an important impact on individuals and communities. The psychological effects of the  
13 disease itself as well as the traumatic experiences of loved ones are seen at individual  
14 level. At community level, health services, social systems and economic productivity are  
15 severely affected [5].

16 Two months after the first case reported in Spain and 2.5 weeks into the quarantine  
17 and self-isolation of the region of Catalonia, the emotional burden of the general  
18 community had increased. An important impact on mental health and emotional burden  
19 by SARS-CoV-2 epidemics and mass quarantines which have been implemented in other  
20 epidemics context has been reported [6–9]. Moreover, because a certain level of anxiety  
21 is necessary for the adoption of recommended precautionary measures against infection  
22 outbreaks [10], and for the successful implementation of public health interventions, a  
23 better understanding of people's attitudes and the assessment of psychological impact on  
24 them should be mandatory.

1  
2  
3 On the other hand, 2,600 (16%) of the confirmed cases in our setting by March 30<sup>th</sup> 2020  
4  
5 affected healthcare workers (HCW). Besides their obvious increased risk of being  
6  
7 infected, the HCW facing the SARS-CoV-2 epidemics on the frontline (emergency  
8  
9 rooms, ICUs, and other depts.) were put under high levels of stress and anxiety. This  
10  
11 worsened as the tension in the Health Systems increased, requiring them to face important  
12  
13 ethical dilemmas including triage of patients. Additionally, the SARS epidemic proved  
14  
15 that frontline healthcare workers not only suffered from chronic stress at the time, but that  
16  
17 this lasted for at least one year after the epidemic wave was over [11].  
18  
19

20  
21 In the face of all this, we decided to conduct a cross-sectional study to evaluate the impact  
22  
23 of the first wave of the Covid-19 pandemic on both the general population and HCW,  
24  
25 specifically on their socio-economic status and their psychological distress.  
26  
27

## 28 **2. M&M**

### 29 **2.1. Ethics**

30  
31  
32  
33 The study was reviewed and approved by the corresponding Ethics Committee, the  
34  
35 Comitè Ètic de l'Hospital Universitari Germans Trias i Pujol; and conformed to the  
36  
37 principles embodied in the Declaration of Helsinki. The ethical clearance was obtained  
38  
39 before starting the project. The survey was created and shared complying with the  
40  
41 European General Data Protection Regulation (GDPR), and all data was processed  
42  
43 anonymously. The project is registered in ClinicalTrials.gov under the identifier  
44  
45 NCT04378452.  
46  
47  
48

### 49 **2.2. Study procedures**

50  
51  
52 Following the suggestions of members of the public, that claimed that the pandemic was  
53  
54 impacting on people's lives and the need of assessing the nature of this impact, we created  
55  
56 an anonymous online survey with the Typeform software (Typeform SL, Barcelona,  
57  
58 Spain). It included 74 questions on demographic data (12 questions), socio-economic  
59  
60



1  
2  
3 sphere (8 questions), habits and health status related to Covid-19 during confinement (13  
4  
5 2 questions) and mental health dimension (through questions related to depression, anxiety,  
6  
7 stress and Post-Traumatic Stress Disorder [PTSD] symptoms [41 questions])  
8  
9  
10 4 (Supplementary Table 1). Patients and public were involved in the data collection as the  
11  
12 survey was shared in 5 different languages (Catalan, Spanish, English, Italian, and  
13  
14 6 French) through social media using snowball sampling from the 3<sup>rd</sup> to 19<sup>th</sup> April 2020.  
15  
16 The data were downloaded as a spreadsheet file (Excel Microsoft Office) after collection  
17  
18 and deleted from the Typeform software.  
19  
20  
21

### 22 **2.3. Analysis and Statistics**

23  
24 10 Since there were no specific criteria for age stratification or the population density  
25  
26 (inhabitants / km<sup>2</sup>) of the municipality where the respondents lived that was significant  
27  
28 12 for all questions, it was decided to divide these categories in the cohort into groups  
29  
30 containing a similar sample size. Thus, and taking into account the volume of responses  
31  
32 obtained, age ranges have been determined statistically so that they are homogeneous in  
33  
34 14 terms of number of surveys completed by group.  
35  
36

37  
38 16 The questions were grouped into indexes (socioeconomic precariousness index,  
39  
40 depression index, anxiety index, stress index, or PTSD). The scores of the socio-economic  
41  
42 18 precariousness index and population density by the respondents were segmented into 4  
43  
44 groups each. The criteria for segmentation were established in order to obtain balanced  
45  
46 20 groups in terms of the number of respondents in each category.  
47  
48

49  
50 We determined 4 ranges of age: <42 years old, 42-52, 52-61 and >61 y.o. The 4 score  
51  
52 22 ranges of the 0-19 scale of socio-economic precariousness established were: low  
53  
54 precariousness  $\leq 7$  points, mid-low=7-8.5, mid-high=8.5-10 and high >10 points.  
55

56 24 All results were obtained taking into account the fact that the respondents were part of  
57  
58 the totality of the cohort of respondents. Responses were also analyzed in total by  
59  
60

category and broken down into percentages according to conditional distributions taking into account; on the one hand the gender of the respondents, and on the other their age group.

We took the non-binary gender and those who preferred not to say which gender they identify as into account when analyzing the results, as this enriches the conclusions.

However, statistical analysis, often does not take into account the minimum volumes of responses and therefore only the groups of women and men were compared.

Response percentages were calculated based on the number of respondents for each answer out of the total number of responses to each question. To assess whether the categorical variables were significantly related or not, we applied the Chi-Square test independently in the observed counts. We conducted a bivariate analysis between scores and sociodemographic variables. Differences in score distribution between different groups were assessed by comparing probability distributions using a two-band Wilcoxon-signed rank test and collecting the p-value using Matlab's 'signrank' function [12,13].

All tests were applied bilaterally using a significance of 5% ( $p < 0.05$ ).

### **3. Results**

#### **3.1. Characteristics of the cohort**

We analyzed 56,656 questionnaires. The characteristics of the cohort are described in Table 1. Differences between categories by gender and age are described in Supplementary Table 2. The majority of respondents were females (70.4%), and from Catalonia. Those living most precariously were under 42 years old, with 18.43% sharing an apartment/house. ( $p < 0.01$ ). Most respondents had a degree (42.62%), and a qualified job (36.13%). 9% of total respondents worked in the healthcare sector. Most unemployed people were in the younger age range (7.6%) and in the non-binary/those who preferred not to say groups (approximately 12% each).

1  
2  
3 Up to 60% of the total declared that they were taking care of someone: 24.81% caring for  
4  
5 2 children of <16 years and 15.11% caring for parents. Women were caregivers more  
6  
7 frequently than men ( $p<0.01$ ). The burden of care was also higher for women and people  
8  
9 of 42-61 years old ( $p<0.01$ ) and concerningly high for 4.79% of total respondents.  
10  
11

### 12 **3.2. Impact of the pandemic on the General population**

13  
14 6 The impact on general population according to the responses obtained to the questionnaire  
15  
16 is described in Table 2. Categories of responses by gender and group are described in  
17  
18 Supplementary Table 2. 85.32% of the cohort declared they were remaining at home.  
19  
20 Those working in essential services were mostly women or of non-binary gender, and the  
21  
22 percentage of women was also higher amongst those who were obliged to go to work on-  
23  
24 10 site ( $p<0.01$ ).  
25  
26

27  
28 12 Only 2 weeks after starting the lock-down, 25% of the cohort had already lost their job  
29  
30 or work. People under 52, as opposed to people over 52, and men, as opposed to women,  
31  
32 were the most affected ( $p<0.01$ ). 20.67% of the respondents declared that they had no  
33  
34 savings at all (Table 1). After the start of measures announced by the authorities to cope  
35  
36 with the pandemic, 82.75% of respondents declared that they were being careful or had  
37  
38 16 decreased their expenses. Up to 8.78% of respondents declared that they had used social  
39  
40 services help or that would need to use it soon. Those under 52 and people identifying as  
41  
42 18 non-binary gender or preferring not to say were the most affected ( $p<0.01$  and  $p<0.05$ ,  
43  
44 respectively). Those under 42 years, followed by people over 61 and people identifying  
45  
46 as non-binary gender were the ones who showed higher precariousness index values  
47  
48 20 ( $p<0.01$ ).  
49  
50  
51 22

52  
53 The 19.84% of respondents declared that they had had contact with someone infected by  
54  
55 24 SARS-CoV-2, half of them with a confirmed or probable case and this was more frequent  
56  
57 for women under 52 ( $p<0.01$ ). 35.75% declared that during the previous 14 days they had  
58  
59  
60

1  
2  
3 used at least one existing healthcare resource or one put in place by the authorities in the  
4  
5 context of the pandemic, and 64.25%, had used none. 73.82% declared to have had one  
6  
7 or more symptoms compatible with Covid-19. The most frequent symptoms were  
8  
9 headache (16.01%), sore throat and nasal congestion (9.85% and 9.17% respectively).  
10  
11 Only 1.76% of people with one symptom or more had received a PCR test and only 1.81%  
12  
13 of those declaring three symptoms or more. Women and under 42 said that they felt worse  
14  
15 at the moment they answered the survey than people in other groups ( $p<0.01$ ).

16  
17  
18 The 42.05% of respondents said they had increased their consumption habits: in most  
19  
20 cases of food. Women under 42 showed the largest increase in consumption, except for  
21  
22 illegal drugs, compared with other groups ( $p<0.01$ ).

23  
24  
25 Most people said TV was their source of information on the pandemic (36.77%), followed  
26  
27 by social media (29.23%). 30% of people only used one source, 37.84% 2 sources and  
28  
29 23.05% used 3. There was no difference across gender or age groups. 26.82% declared  
30  
31 that the information given did not accurately reflect reality (more frequent in women and  
32  
33 people over 52 ( $p<0.01$ ), and another 20.92% said that it was too negative or too  
34  
35 sensationalist (more frequent in men and people under 42 ( $p<0.01$ )). 73.13% declared that  
36  
37 they were afraid or worried, these including more women, but a lower percentage of  
38  
39 people over 61 ( $p<0.01$ ).

40  
41  
42 The 78.56% of the cohort declared that the pandemic had changed them, most of them  
43  
44 (50,41%) in the way that they see society/how we used to live. Those most affected were  
45  
46 women (more than men) and those under 42 vs the >61 ( $p<0.01$  in both cases).

### 22 3.3. Impact of pandemic on HCW

23  
24 A total of 5,104 people (9.05% of the total) identified themselves as workers in the  
25  
26 healthcare sector, most of them women. While the proportion women/men in the total  
27  
28 cohort is 70/30 in this subgroup the proportion is 85/15. The impact on this population is  
29  
30

1  
2  
3 detailed in Table 3. 41.65% of healthcare personnel declared that they had worked  
4  
5 2 directly with Covid-19 patients, 32% of them while on duty. The majority of healthcare  
6  
7 workers said that they were afraid to work with Covid-19 patients (75.87%). As it was a  
8  
9 multiple-choice question, we know that around the 42.90% were afraid of transmitting  
10  
11 4 the infection to their relatives/friends, 17.07% feared getting infected or transmitting it to  
12  
13 the infection to their relatives/friends, 17.07% feared getting infected or transmitting it to  
14  
15 6 other patients, and 4.28% were afraid of dying. Surprisingly, fear of dying decreased with  
16  
17 age. In all cases it was higher percentages of younger HCW who said they were afraid  
18  
19 8 (p<0.01).

20  
21 More than 6 percent of healthcare workers (6.27%) were worried of taking medical  
22  
23 10 decisions that represented an ethical problem for them. In fact, nearly 18.60% of them  
24  
25 said that they had ethical problems/dilemmas/issues while working. Of these, the younger  
26  
27 12 the respondents, the higher the percentage, especially with the patient triage and  
28  
29 obligatory protocols (p<0.01). As many as 437 of 5,104 healthcare workers decided to  
30  
31 explain to us which ethical problems they had had. We have grouped the problems and  
32  
33 14 issues that the professionals listed, and the results are found in Table 3.

### 34 35 36 37 16 **3.4. Impact of the pandemic on mental health status**

38  
39 Table 4 summarizes the conditions found statistically significantly associated (p<0.05)  
40  
41 18 with the mental health symptoms evaluated. According to this table, we have identified 7  
42  
43 target groups susceptible to benefitting from an intervention, and which should be taken  
44  
45 20 into account when designing new contention measures to cope with the pandemic: 1)  
46  
47 women; 2) people under 42; 3) caregivers ; 4) people working in essential services or  
48  
49 22 non-qualified jobs; 5) people with a higher precariousness index; 6) Covid-19 patients  
50  
51 and 7) healthcare personnel, especially those working with Covid-19 patients.  
52  
53  
54  
55  
56  
57  
58  
59  
60

#### 4. Discussion

2 Researchers have already sounded the alarm about how the Covid-19 pandemic may  
3  
4  
5  
6  
7  
8  
9  
10  
11  
12  
13  
14  
15  
16  
17  
18  
19  
20  
21  
22  
23  
24  
25  
26  
27  
28  
29  
30  
31  
32  
33  
34  
35  
36  
37  
38  
39  
40  
41  
42  
43  
44  
45  
46  
47  
48  
49  
50  
51  
52  
53  
54  
55  
56  
57  
58  
59  
60

2 Researchers have already sounded the alarm about how the Covid-19 pandemic may affect the mental health of the general population, and more specifically patients with previous physical or mental conditions (including previous mental disorders) [14,15] and people at risk due to their socio-economic conditions. The current study aimed to identify the impacts of the covid-19 pandemia at several levels using a questionnaire.

Our survey was disseminated through social media, thus the sample of population studied could not be controlled. However, this was a successful strategy to rapidly reach a large number of people in different settings and different regions, without exposing interviewers to infection. Even though this does not ensure representability, there is no other study that has reached such a huge number of subjects, as more than 50,000 completed questionnaires were obtained from geographical regions hit by the pandemic in different ways.

The criteria used to establish the age ranges, the population density and the socioeconomic precariousness index were statistical, in order to obtain balanced groups in terms of number of responses. This provides rigor but can be confusing because this segmentation is unusual and can lead to a certain bias.

As for the impact on the socioeconomic sphere, the highest level of precariousness, which according to what the results seem to reflect occurs in those under 42 years of age, is striking. Of particular concern is the fact that 25% of the people who responded to the survey in our study had decreased their workload due to the epidemic situation. According to the International Labor Organization (ILO), the reduction in employment is greater among women and younger and older people, who have all been particularly affected by the Covid-19 crisis. In our study, men are the ones who had lost more jobs or assignments previously contracted or hired, and we saw that higher percentages of those under 52

1  
2  
3  
4  
5  
6  
7  
8  
9  
10  
11  
12  
13  
14  
15  
16  
17  
18  
19  
20  
21  
22  
23  
24  
25  
26  
27  
28  
29  
30  
31  
32  
33  
34  
35  
36  
37  
38  
39  
40  
41  
42  
43  
44  
45  
46  
47  
48  
49  
50  
51  
52  
53  
54  
55  
56  
57  
58  
59  
60

years old had been dismissed or submitted to a temporary labour force adjustment.

2 Overall, global labour incomes have been estimated to have fallen by 10.7% during the  
first three quarters of 2020 (compared to the same period in 2019) [16], but we believe  
4 this could be much worse given our results. In addition, in our study, a quarter of  
respondents had no savings to deal with contingencies, and up to 8.78% stated that they  
6 had applied for social benefits or that they would do so soon. All of this is important  
because as we have demonstrated in our results, socioeconomic precariousness was  
8 revealed to be one of the factors associated with higher scores on mental health indices,  
and this is even more worrying given that the incidence of the epidemic was also more  
10 pronounced in the poorest neighborhoods, at least in Barcelona [17]. We would also like  
to mention that more studies should be carried out to analyze the socio-economic  
12 precariousness of the group of non-binary people, as we have seen trends that have not  
been statistically evident but would be worth confirming.

14 According to the literature, approximately 20% of the population affected seems  
consistent [7,18,19], even if in some cases higher percentages have been found [20,21].  
16 According to our results, we have identified up to 7 target groups at higher risk of  
impaired mental health status and susceptible to benefitting from an intervention, and  
18 which should be taken into account when designing new contention measures against the  
pandemic. In our study we did find an association of worse symptoms scoring with the  
20 presence of symptoms compatible with Covid-19 or having used all the healthcare  
resources put in place. However, as a real intervention based on these assumptions would  
22 be very costly and logistically difficult, we do consider instead that the target group for  
an intervention should be confirmed Covid-19 patients.

24 Other studies have also shown that being female, young, and having unstable work or  
income to be significant correlators of psychological negative impact [20–23]. Women



1  
2  
3 are especially vulnerable as they bear the heavier burden of childcare and care of the  
4  
5 2 elderly, suffer gender violence and have more precarious jobs. This effect, which is  
6  
7 generalized in society, is even more obvious if the female sex is combined with  
8  
9 characteristics of vulnerable groups [24]. Sex and gender biases have been identified as  
10  
11 linked to Covid-19 outbreaks. In many settings, women appear to be slightly more likely  
12  
13 to be diagnosed with Covid-19, which may in part be due to the fact that women account  
14  
15 6 for the majority of health care workers around the world. Moreover, several studies have  
16  
17 highlighted that fact that health staff who are women, younger or parents of dependent  
18  
19 8 children are more vulnerable to psychological distress [25]. We also know that crises  
20  
21 exacerbate gender inequalities: gender-based violence increased during confinement  
22  
23 [26]; women were doing 3-10 times more care work than men; women faced significant  
24  
25 10 barriers to healthcare due to lack of autonomy over their own sexual and reproductive  
26  
27 health, inadequate access to health services, and insufficient financial resources [27]. In  
28  
29 12 this sense, it is anticipated that the Covid-19 crisis will trigger an economic recession  
30  
31 which will disproportionately impact the income and employment of the most vulnerable,  
32  
33 particularly women [28]. In our setting it was mostly women who were responsible for  
34  
35 caring for others. Caregiver adults with higher perception of the difficulty of quarantine  
36  
37 16 for children and the whole family suffered more psychological distress than the other  
38  
39 groups. This was previously identified in a cohort of parents in Italy, showing that their  
40  
41 individual perception was associated with their stress levels and a negative behavioural  
42  
43 18 and emotional impact on their children. As this study points out, some of the causes for  
44  
45 this could be the impact of the situation itself both on the adults and the children, plus the  
46  
47 20 effects of the school closure together with the need for working from home with a lot of  
48  
49 new inputs. It not only has a negative effect on the adults, but on the children both  
50  
51 22 indirectly [29] and directly [30]. Schools provide not only education, but also counselling  
52  
53  
54  
55  
56  
57  
58  
59  
60



1  
2  
3 and promote and imply healthy habits (healthy diet, physical exercise, social interaction),  
4  
5 2 that might not be continued at home [30].  
6  
7

8 On the other hand, people over 60 years old were the vast majority of the total number of  
9  
10 4 deaths all over the world [31]. While their frailty and an increased risk of suffering Covid-  
11  
12 19 if living in nursing homes or similar facilities is true/undeniable, the elderly are key in  
13  
14 6 Mediterranean countries, such as ours, as they take care of grandchildren when their  
15  
16 parents go to work, so to quarantine and isolate them can be very disturbing for the whole  
17  
18 8 of society. Moreover, Covid-19 and the consequences of isolating the elderly can be  
19  
20 devastating, not only for their mental health but also as it contributes to a greater risk of  
21  
22 morbidity, and this can be even worse in the more disadvantaged populations [32,33]. In  
23  
24 10 this perspective, older people had more difficulties than younger people in adjusting to  
25  
26 lockdown and social distancing rules. On the other hand, older people have proved that  
27  
28 12 they have more resilience than younger people in other outbreaks and major hazards [34],  
29  
30 something that our results also support by showing that older people were less afraid of  
31  
32 dying than younger ones. All seniors showed anxiety and depression issues in China, and  
33  
34 14 results were worse for females [35]. A Spanish study reported that up to 25.6% of a  
35  
36 sample of adults with a mean age of 65 had symptoms of depression and 32.1% symptoms  
37  
38 16 of avoidant coping style, and that having a current or past history of mental disorders  
39  
40 highly influenced this, while the main protective factor was the ability to enjoy free time  
41  
42 18 [36]. However, we found that younger people coped worse than older people with the  
43  
44 mental burden due to the Covid-19 pandemic and the measures dictated to combat it.  
45  
46 20 Differences between younger and older adults in emotional responses and recovery have  
47  
48 been previously described, and several reasons for it have been hypothesized, including  
49  
50 22 the fact that the elderly have a higher sense of meaning of life and that for them perceiving  
51  
52 time as finite determines their priorities in terms of goals and behaviours [37]. In the  
53  
54 24  
55  
56  
57  
58  
59  
60

1  
2  
3 context of the Covid-19 outbreak's first wave, others have reported an increased negative  
4  
5 2 impact on younger people compared with the elderly. A study in France after 2 weeks of  
6  
7 confinement reported sleep problems and increased consumption of sleeping pills, with  
8  
9 both more frequent in people under 35 compared to older people[38]. Young adults  
10  
11 already face life changes which are stressful and the pandemic has worsened this, even if  
12  
13 one out of five young adults might have been better off because of being removed from  
14  
15 external pressures such as work and education and/or to having more time for close  
16  
17 relationships [39]. A nice study in Switzerland concluded that for this specific population  
18  
19 the distress related to lifestyle disruptions and hopelessness was higher than the perceived  
20  
21 virus-related health risk [39], which others have already shown to be was relatively low  
22  
23 [40]. Shanahan et al also showed that a good group to be selected for intervention could  
24  
25 be females, migrants and young adults with higher pre-pandemic emotional distress  
26  
27 including social exclusion [39]. Another factor which has been related to distress is the  
28  
29 decrease of physical and social activity due to lockdown and other restriction measures  
30  
31 decreed by Governments, which had a negative impact on psychological wellbeing of  
32  
33 individuals including the elderly [41], but especially on the group of adolescents and  
34  
35 young adults [40,42].  
36  
37  
38 18 A non-negligible proportion of our respondents were HCW, who in Europe are mostly  
39  
40 women [43]. Besides their obvious increased risk of being infected [44], facing the  
41  
42 SARS-CoV-2 epidemics at the frontline may have put them under a lot of pressure,  
43  
44 increasing levels of anxiety and chronic stress (as they faced tremendous overwork and  
45  
46 suboptimal working conditions), which can last to up to a year afterwards [11,45,46].  
47  
48  
49 20 A study carried out in a cohort of 9,138 HCW showed that 45.7% were at risk of suffering  
50  
51 from a mental disorder [47], and another, which included 5,450, showed that 8.4% had  
52  
53 suicidal ideation and behaviour [48]. In our study, being a HCW has been revealed as a  
54  
55  
56  
57  
58  
59  
60

1  
2  
3  
4  
5  
6  
7  
8  
9  
10  
11  
12  
13  
14  
15  
16  
17  
18  
19  
20  
21  
22  
23  
24  
25  
26  
27  
28  
29  
30  
31  
32  
33  
34  
35  
36  
37  
38  
39  
40  
41  
42  
43  
44  
45  
46  
47  
48  
49  
50  
51  
52  
53  
54  
55  
56  
57  
58  
59  
60

positive factor for impaired mental health, especially for those working with Covid-19 patients and afraid of infecting others, which has proved to have an impact on outcomes [49].

This becomes worse as the tension in health systems increases, as front-line professionals work in a complex environment given the ethical challenges of the Covid-19, eliciting different dimensions of ethical dilemmas related to the situation itself and the measures dictated by the Government [50]. The shortage of hospital beds — and especially ICU beds — was also an important problem, contributing to the case fatality rate and implying a triage of patients in order to preserve the beds for those with an increased potential to survive [51–53]. The management of end-of-life situations was particularly worrying, as banning the support of relatives at the bedside had a very disturbing impact on patients and their families, but also on HCW mental health, workload, challenges and professional outcomes [54]. According to our results, nearly 8 out of 10 HCW declared that they were afraid of working with COVID patients, especially because of infecting others. Being obliged to work with lack of appropriate or sufficient personal protective equipment was one of the most frequent complaints of HCW who shared their narratives on the ethical concerns they suffered. This low sense of security had been previously pointed out in a small HCW cohort in Spain [55], in nurses in Poland [56] and in Latin America [57]. We found differences between women and men in terms of the fear of transmitting the infection to others, and this could be related to women's jobs implying more exposure (as is the case for nurses, that in our cohort were mostly women). In our study those working in essential services also had higher psychological distress and this could be for the same reason, the low sense of security, plus the fear of being at higher risk of contracting the infection.

1  
2  
3 The 6.27% declared that that their fear was of making medical decisions that represented  
4  
5 2 an ethical problem for them (patient selection or application of protocols), and this  
6  
7 percentage was higher in younger people.  
8  
9

10 4 In fact, in our sample, one in five of the HCW declared that they had had ethical problems  
11  
12 during those first weeks of the peak of the first wave, which is in line with other studies  
13  
14 6 [54,58]; and approximately half of these had to do with patient selection or patient triage  
15  
16 protocols/therapeutic indications. In our opinion, this fact should also be explored more  
17  
18 8 thoroughly and actively followed up to prevent health professionals from being put into  
19  
20 similar situations in the future.  
21  
22  
23  
24  
25

## 26 **5. Conclusion**

27  
28 12 Our study represents a photograph of the impact of the Covid-19 outbreak on the general  
29  
30 wellbeing of the population and HCW, which should open the door for the elaboration of  
31  
32 14 strategy proposals with the full participation of institutional leaders who are in a position  
33  
34 to adapt policy to the real needs of the people. Previous work in smaller, selected cohorts  
35  
36 16 (seniors, youth, etc.) has described the significant impact of the pandemic in a number of  
37  
38 areas, including mental health problems in 20% of the population. In this project we have  
39  
40 18 studied 56,656 completed surveys and analyzed the effects of Covid-19 on family  
41  
42 finances, habits and attitudes, general health and mental health, and the day to day of  
43  
44 20 health professionals. We were able to confirm the results noted by other smaller studies  
45  
46 and to identify up to seven populations likely to benefit from an intervention: women;  
47  
48 22 those under 42 years old; caregivers; people in a situation of socio-economic  
49  
50 precariousness; essential workers or those with unskilled jobs; Covid-19 patients, and  
51  
52 24 HCW, especially those working with COVID-patients. This data should be used to design  
53  
54 and implement interventions to increase the resilience of these identified groups, as well  
55  
56  
57  
58  
59  
60

1  
2  
3 as to prepare an appropriate organizational response. In this sense, some authors have  
4  
5  
6 2 published specific strategies that could be used to alleviate this suffering, especially in  
7  
8 terms of increasing the adaptability of caregivers by providing tools for recognizing risk  
9  
10 4 factors for emotional distress and managing mental health hygiene, but also response  
11  
12 actions by public and private organizations aimed at identifying the employees most at-  
13  
14 6 risk and establishing active mitigating and corrective measures [52,54,59–62]. We think  
15  
16 it would be worthwhile studying how to actively implement and adapt these measures to  
17  
18 our environment, not only in the health field but also by extending them to the groups we  
19  
20 8 have identified. The results obtained could help local and national Governments and  
21  
22 have identified. The results obtained could help local and national Governments and  
23  
24 10 Public Health Services to design or adjust coping measures in the face of potential future  
25  
26 outbreaks or other major hazards that might be difficult for society.  
27

## 28 12 **6. Contributorship statement**

29  
30 MRS, CA, MV and CV made substantial contributions to the conception or design of the  
31  
32  
33 14 work. JF, JLR, JMM, LA, MRS, CA and CV made substantial contributions to the  
34  
35 acquisition and analysis of data. MRS, CA, PJC, JAMM, MV, BA, JU, ASB made  
36  
37 16 substantial contributions to the interpretation of data. MRS, CA, CV drafted the  
38  
39 manuscript and all the others authors revised it critically for important intellectual content.  
40  
41  
42 18 All authors gave final approval of the version to be published.  
43

## 44 45 **7. Acknowledgements**

46  
47 20 We want to thank to all the people that kindly shared the survey questionnaire through  
48  
49 social media and/or completed it. We thank as well as Jérôme Nigou, Valeria Bergalli,  
50  
51 22 Paolo Salieri, Chiara Bertoldini and Harvey Evans, who kindly volunteered to  
52  
53 translate/edit the questionnaire and website information to French, Italian and English  
54  
55  
56 24 languages.  
57  
58  
59  
60

## 8. Data sharing statement

The complete dataset results generated is available at:  
<https://zenodo.org/badge/DOI/10.5281/zenodo.4608502.svg>.

## 9. Patient Public Involvement

The project was rapidly designed in a week following the suggestions of members of the public that contacted the authors sharing with them their experience and priorities, claiming that the pandemic was impacting on people's lives and the need of assessing the nature of this impact at several health dimensions that at that moment worried them most. Patients and public were involved in the data collection as the survey was shared in 5 different languages through social media using snowball sampling. A report has been generated based on the study and results presented in this manuscript to be disseminated to the general public. This will be done through its upload in the institutional websites and share by email to a list of people that gave specific consent to be notified of the results obtained. A press release will also be issued and the project and its results will be shared through mass media and discussed with key community members through meetings and public debates.

## 10. Funding

This work was supported by the Spanish Government-FEDER Funds through CV [CPII18/00031], and funding from the European Union's Horizon 2020 research and innovation programme under grant agreement No 847762 through LAC contract.

## 11. References

1. Ministerio de Sanidad Servicios Sociales e Igualdad; Ministerio de Economía y Competitividad; Instituto de Salud Carlos III. Situación del COVID-19 en España. Available at: <https://covid19.isciii.es/>.
2. Catalunya D de S de la G de. Comunicat del Departament de Salut, 29 de març de

1  
2  
3  
4  
5  
6  
7  
8  
9  
10  
11  
12  
13  
14  
15  
16  
17  
18  
19  
20  
21  
22  
23  
24  
25  
26  
27  
28  
29  
30  
31  
32  
33  
34  
35  
36  
37  
38  
39  
40  
41  
42  
43  
44  
45  
46  
47  
48  
49  
50  
51  
52  
53  
54  
55  
56  
57  
58  
59  
60

2020. Available at: <http://canalsalut.gencat.cat/ca/salut-a-z/c/coronavirus-2019-ncov/nota-premsa/?id=384272>.

3. CDC. Patients with COVID-19 . CDC website. 2020. Available at: <https://www.cdc.gov/coronavirus/2019-ncov/hcp/disposition-hospitalized-patients.html%0D%0A%0D%0A%0D%0A>. Accessed 20 March 2020.

4. European Centre for Disease Prevention and Control. Novel coronavirus disease 2019 ( COVID-19 ) pandemic : increased transmission in the EU / EEA and the UK – sixth update. 2020. Available at: <https://www.ecdc.europa.eu/sites/default/files/documents/RRA-sixth-update-Outbreak-of-novel-coronavirus-disease-2019-COVID-19.pdf>.

5. Van Bortel T, Basnayake A, Wurie F, et al. Psychosocial effects of an Ebola outbreak at individual, community and international levels. *Bull World Health Organ* **2016**; 94:210–214.

6. Rubin GJ, Wessely S. The psychological effects of quarantining a city. *BMJ* **2020**; 368:1–2. Available at: <http://dx.doi.org/doi:10.1136/bmj.m313>.

7. Wang C, Pan R, Wan X, et al. Immediate psychological responses and associated factors during the initial stage of the 2019 coronavirus disease (COVID-19 ) epidemic among the general population in China. *Int J Environ Res Public Health* **2020**; 17.

8. Sim K, Huak Chan Y, Chong PN, Chua HC, Wen Soon S. Psychosocial and coping responses within the community health care setting towards a national outbreak of an infectious disease. *J Psychosom Res* **2010**; 68:195–202.

9. Brooks SK, Webster RK, Smith LE, et al. The psychological impact of quarantine and how to reduce it: rapid review of the evidence. *Lancet* **2020**; 395:912–920. Available at: [http://dx.doi.org/10.1016/S0140-6736\(20\)30460-8](http://dx.doi.org/10.1016/S0140-6736(20)30460-8).

10. Leung GM, Lam TH, Ho LM, et al. The impact of community psychological responses on outbreak control for severe acute respiratory syndrome in Hong Kong. *J Epidemiol Community Health* **2003**; 57:857–863.
11. McAlonan GM, Lee AM, Cheung V, et al. Immediate and sustained psychological impact of an emerging infectious disease outbreak on health care workers. *Can J Psychiatry* **2007**; 52:241–247.
12. Gibbons JD, Chakraborti S. *Nonparametric Statistical Inference*. 5th ed. Boca Raton: Chapman & Hall/CRC Press, Taylor & Francis Group, 2011.
13. Hollander M, Wolfe D. *Nonparametric Statistical Methods*, 2nd Edition. 1999.
14. Yao H, Chen JH, Xu YF. Patients with mental health disorders in the COVID-19 epidemic. *The Lancet Psychiatry* **2020**; 7:e21. Available at: [http://dx.doi.org/10.1016/S2215-0366\(20\)30090-0](http://dx.doi.org/10.1016/S2215-0366(20)30090-0).
15. Cullen W, Gulati G, Kelly BD. Mental health in the COVID-19 pandemic. *QJM* **2020**; 113:311–312.
16. International Labour Organization. *ILO Monitor: COVID-19 and the world of work*. Second edition. Updated estimates and analysis. 2020. Available at: [https://www.ilo.org/wcmsp5/groups/public/@dgreports/@dcomm/documents/briefingnote/wcms\\_740877.pdf](https://www.ilo.org/wcmsp5/groups/public/@dgreports/@dcomm/documents/briefingnote/wcms_740877.pdf).
17. Mari-Dell’olmo M, Gotsens M, Pasarín MI, et al. Socioeconomic inequalities in COVID-19 in a European urban area: Two waves, two patterns. *Int J Environ Res Public Health* **2021**;
18. González-Sanguino C, Ausín B, Castellanos MÁ, et al. Mental health consequences during the initial stage of the 2020 Coronavirus pandemic (COVID-19) in Spain. *Brain Behav Immun* **2020**;
19. Wang C, Pan R, Wan X, et al. A longitudinal study on the mental health of general



- 1  
2  
3 population during the COVID-19 epidemic in China. *Brain Behav Immun* **2020**;  
4  
5 20. Rodríguez-Rey R, Garrido-Hernansaiz H, Collado S. Psychological Impact and  
6  
7 Associated Factors During the Initial Stage of the Coronavirus (COVID-19 )  
8  
9  
10 4 Pandemic Among the General Population in Spain. *Front Psychol* **2020**;  
11  
12 21. Jacques-Avinõ C, López-Jiménez T, Medina-Perucha L, et al. Gender-based  
13  
14 6 approach on the social impact and mental health in Spain during COVID-19  
15  
16 lockdown: A cross-sectional study. *BMJ Open* **2020**;  
17  
18 22. Ramírez LPG, Arriaga RJM, Hernández-Gonzalez MA, De la Roca-Chiapas JM.  
19  
20 Psychological distress and signs of post-traumatic stress in response to the  
21  
22 10 COVID-19 health emergency in a Mexican sample. *Psychol Res Behav Manag*  
23  
24 **2020**;  
25  
26  
27 23. Cao W, Fang Z, Hou G, et al. The psychological impact of the COVID-19  
28  
29 epidemic on college students in China. *Psychiatry Res* **2020**;  
30  
31  
32 24. Walter LA, McGregor AJ. Sex- and Gender-specific Observations and  
33  
34 Implications for COVID-19 . *West J Emerg Med* **2020**; :507–509.  
35  
36  
37 25. Kisely S, Warren N, McMahon L, Dalais C, Henry I, Siskind D. Occurrence,  
38  
39 prevention, and management of the psychological effects of emerging virus  
40  
41 outbreaks on healthcare workers: rapid review and meta-analysis. *BMJ* **2020**; 369.  
42  
43  
44 26. Peterman A, Potts A, Donnell MO, et al. Working Paper 528 April 2020 Pandemics  
45  
46 20 and Violence Against Women and Children. *Cent Glob Dev* **2020**; :43.  
47  
48  
49 27. Davies SE, Bennett B. A gendered human rights analysis of Ebola and Zika:  
50  
51 22 Locating gender in global health emergencies. *Int Aff* **2016**;  
52  
53  
54 28. Mollona E, Aivazidou E, Barberio V, Cunico G, Pareschi L. A policy framework  
55  
56 24 for tackling the economic and social impact of the COVID-19 crisis. 2019.  
57  
58  
59 29. Spinelli M, Lionetti F, Pastore M, Fasolo M. Parents' Stress and Children's  
60

- 1  
2  
3 Psychological Problems in Families Facing the COVID-19 Outbreak in Italy.  
4  
5  
6 2 Front Psychol **2020**;  
7  
8 30. Wang G, Zhang Y, Zhao J, Zhang J, Jiang F. Mitigate the effects of home  
9  
10 4 confinement on children during the COVID-19 outbreak. *Lancet* **2020**; 395:945–  
11  
12 947.  
13  
14 6 31. Kang SJ, Jung SI. Age-Related Morbidity and Mortality among Patients with  
15  
16 COVID-19 . *Infect Chemother* **2020**;  
17  
18 8 32. Armitage R, Nellums LB. COVID-19 and the consequences of isolating the  
19  
20 elderly. *Lancet Public Heal* **2020**; 5:e256. Available at:  
21  
22 [http://dx.doi.org/10.1016/S2468-2667\(20\)30061-X](http://dx.doi.org/10.1016/S2468-2667(20)30061-X).  
23  
24 10  
25  
26 33. Petretto DR, Pili R. Ageing and COVID-19 : What is the Role for Elderly People?  
27  
28 12 *Geriatrics* **2020**; 5:25.  
29  
30  
31 34. Cohen O, Geva D, Lahad M, et al. Community Resilience throughout the Lifespan  
32  
33 14 the Potential Contribution of Healthy Elders. *PLoS One* **2016**; 11:1–14.  
34  
35  
36 35. Meng H, Xu Y, Dai J, Zhang Y, Liu B, Yang H. Analyze the psychological impact  
37  
38 16 of COVID-19 among the elderly population in China and make corresponding  
39  
40 suggestions. *Psychiatry Res.* 2020;  
41  
42 18 36. Bobes-Bascarán T, Sáiz PA, Velasco A, et al. Early psychological correlates  
43  
44 associated with COVID-19 in a Spanish older adult sample. *Am J Geriatr*  
45  
46 *Psychiatry* **2020**; :1–12. Available at:  
47  
48 20 <http://www.sciencedirect.com/science/article/pii/S1064748120304759>.  
49  
50  
51 22 37. Fernández-Aguilar L, Ricarte J, Ros L, Latorre JM. Emotional differences in  
52  
53 young and older adults: Films as mood induction procedure. *Front Psychol* **2018**;  
54  
55  
56 24 38. Beck F, Léger D, Fressard L, Peretti-Watel P, Verger P. Covid-19 health crisis  
57  
58 and lockdown associated with high level of sleep complaints and hypnotic uptake  
59  
60

1  
2  
3  
4  
5  
6  
7  
8  
9  
10  
11  
12  
13  
14  
15  
16  
17  
18  
19  
20  
21  
22  
23  
24  
25  
26  
27  
28  
29  
30  
31  
32  
33  
34  
35  
36  
37  
38  
39  
40  
41  
42  
43  
44  
45  
46  
47  
48  
49  
50  
51  
52  
53  
54  
55  
56  
57  
58  
59  
60

at the population level. *J. Sleep Res.* 2020;

- 2 39. Shanahan L, Steinhoff A, Bechtiger L, et al. Emotional Distress in Young Adults  
During the COVID-19 Pandemic: Evidence of Risk and Resilience From a  
4 Longitudinal Cohort Study. *Psychol Med* 2020;
40. Commodari E, La Rosa VL. Adolescents in quarantine during COVID-19  
6 pandemic in Italy: Perceived health risk, beliefs, psychological experiences and  
expectations for the future. *Front Psychol* 2020; 11:2480.
- 8 41. Suzuki Y, Maeda N, Hirado D, Shirakawa T, Urabe Y. Physical activity changes  
and its risk factors among community-dwelling Japanese older adults during the  
10 COVID-19 epidemic: Associations with subjective well-being and health-related  
quality of life. *Int J Environ Res Public Health* 2020; 17:1–12.
- 12 42. Maugeri G, Castrogiovanni P, Battaglia G, et al. The impact of physical activity  
on psychological health during Covid-19 pandemic in Italy. *Heliyon* 2020;
- 14 43. Rossi R, Socci V, Pacitti F, et al. Mental Health Outcomes Among Frontline and  
Second-Line Health Care Workers During the Coronavirus Disease 2019 (COVID-  
16 19 ) Pandemic in Italy. *JAMA Netw open* 2020; 3:e2010185. Available at:  
<http://www.ncbi.nlm.nih.gov/pubmed/32463467>.
- 18 44. Xiao J, Fang M, Chen Q, He B. SARS, MERS and COVID-19 among healthcare  
workers: A narrative review. *J Infect Public Health* 2020; 13:843–848. Available  
20 at: <https://doi.org/10.1016/j.jiph.2020.05.019>.
45. Simione L, Gnagnarella C. Differences Between Health Workers and General  
22 Population in Risk Perception, Behaviors, and Psychological Distress Related to  
COVID-19 Spread in Italy. *Front Psychol* 2020; 11.
- 24 46. Pappa S, Ntella V, Giannakas T, Giannakoulis VG, Papoutsis E, Katsaounou P.  
Prevalence of depression, anxiety, and insomnia among healthcare workers during

- 1  
2  
3 the COVID-19 pandemic: A systematic review and meta-analysis. *Brain. Behav.*  
4  
5  
6 2 *Immun.* 2020;
- 7  
8 47. Alonso J, Vilagut G, Mortier P, et al. Mental health impact of the first wave of  
9  
10 4 COVID-19 pandemic on Spanish healthcare workers: A large cross-sectional  
11  
12 survey. *Rev Psiquiatr Salud Ment* 2021;
- 13  
14 6 48. Mortier P, Vilagut G, Ferrer M, et al. Thirty-day suicidal thoughts and behaviors  
15  
16 among hospital workers during the first wave of the Spain COVID-19 outbreak.  
17  
18 *Depress Anxiety* 2021;
- 19  
20 8  
21 49. Ramaci T, Barattucci M, Ledda C, Rapisarda V. Social stigma during COVID-19  
22  
23 and its impact on HCWs outcomes. *Sustain* 2020;
- 24  
25 10  
26 50. Robert R, Kentish-Barnes N, Boyer A, Laurent A, Azoulay E, Reignier J. Ethical  
27  
28 dilemmas due to the Covid-19 pandemic. *Ann. Intensive Care.* 2020;
- 29  
30 12  
31 51. Zanin M, Xiao C, Liang T, et al. The public health response to the COVID-19  
32  
33 outbreak in mainland China: a narrative review. *J Thorac Dis* 2020;
- 34  
35 14  
36 52. Verweij M, van de Vathorst S, Schermer M, Willems D, de Vries M. Ethical  
37  
38 Advice for an Intensive Care Triage Protocol in the COVID-19 Pandemic: Lessons  
39  
40 Learned from The Netherlands. *Public Health Ethics* 2020;
- 41  
42 18 53. Vincent JL, Creteur J. Ethical aspects of the COVID-19 crisis: How to deal with  
43  
44 an overwhelming shortage of acute beds. *Eur Hear journal Acute Cardiovasc care*  
45  
46 2020;
- 47  
48 20  
49 54. Owens IT. Supporting nurses' mental health during the pandemic. *Nursing (Lond)*  
50  
51 22 2020; 50:54–57.
- 52  
53 55. Martínez-López JÁ, Lázaro-Pérez C, Gómez-Galán J, Fernández-Martínez M del  
54  
55 M. Psychological Impact of COVID-19 Emergency on Health Professionals:  
56  
57 24 Burnout Incidence at the Most Critical Period in Spain. *J Clin Med* 2020;
- 58  
59  
60

- 1  
2  
3 56. Nowicki GJ, Ślusarska B, Tucholska K, Naylor K, Chrzan-Rodak A, Niedorys B.  
4  
5 2 The severity of traumatic stress associated with Covid-19 pandemic, perception  
6  
7 of support, sense of security, and sense of meaning in life among nurses: Research  
8  
9 protocol and preliminary results from poland. *Int J Environ Res Public Health*  
10 4  
11 **2020**;  
12  
13  
14 6 57. Delgado D, Quintana FW, Perez G, et al. Personal safety during the Covid-19  
15  
16 pandemic: Realities and perspectives of healthcare workers in latin America. *Int J*  
17  
18 *Environ Res Public Health* **2020**;  
19 8  
20  
21 58. Epstein EG, Delgado S. Understanding and addressing moral distress. *Online J*  
22  
23 *Issues Nurs* **2010**;  
24 10  
25  
26 59. Tomlin J, Dalgleish-Warburton B, Lamph G. Psychosocial Support for Healthcare  
27  
28 Workers During the COVID-19 Pandemic. *Front Psychol* **2020**;  
29 12  
30  
31 60. Heath C, Sommerfield A, von Ungern-Sternberg BS. Resilience strategies to  
32  
33 14 manage psychological distress among healthcare workers during the COVID-19  
34  
35 pandemic: a narrative review. *Anaesthesia*. 2020;  
36  
37  
38 16 61. Johns Hopkins Berman Institute of Bioethics. Resources for Frontline Clinicians.  
39  
40 2020.  
41  
42 18 62. Maves RC, Downar J, Dichter JR, et al. Triage of Scarce Critical Care Resources  
43  
44 in COVID-19 An Implementation Guide for Regional Allocation: An Expert Panel  
45  
46 20 Report of the Task Force for Mass Critical Care and the American College of Chest  
47  
48 Physicians. *Chest*. 2020;  
49  
50  
51 22  
52  
53  
54  
55

56 24 **12. Tables**  
57  
58  
59  
60

**Table 1:** Characteristics of the cohort.

| ANSWER CATEGORIES               |                        | TOTAL % | ANSWER CATEGORIES                                | TOTAL % |
|---------------------------------|------------------------|---------|--------------------------------------------------|---------|
| <b>Gender</b>                   | Female                 | 70.4    | No                                               | 39.75   |
|                                 | Male                   | 29.22   | Yes, of people of <16                            | 24.81   |
|                                 | Non binary             | 0.15    | Yes, of people of >16                            | 12.24   |
|                                 | Not saying             | 0.12    | Yes, siblings                                    | 1.26    |
| <b>Origin</b>                   | Catalonia region       | 52.80   | Yes, parents                                     | 15.11   |
|                                 | Other Spanish regions  | 46.00   | Yes, others                                      | 6.82    |
|                                 | Other countries        | 1.20    | none                                             | 43.80   |
| <b>Civil status</b>             | Married                | 53.65   | 1                                                | 24.81   |
|                                 | Divorced               | 10.64   | 2                                                | 26.60   |
|                                 | In couple              | 18.19   | 3                                                | 4.36    |
|                                 | Single                 | 14.1    | 4                                                | 0.38    |
|                                 | Widow                  | 3.4     | 5                                                | 0.03    |
| <b>Housing</b>                  | Owned apartment/house  | 90.95   | >2                                               | 7.77    |
|                                 | Shared apartment/house | 7.81    | 2                                                | 66.9    |
|                                 | Rented room            | 1.07    | 1                                                | 25.31   |
|                                 | Centre/institution     | 0.12    | No                                               | 20.67   |
| <b>Maximum Education Degree</b> | Homeless               | 0.03    | Yes                                              | 35.73   |
|                                 | Primary Education      | 3.85    | Some                                             | 43.58   |
| <b>Employment</b>               | Secondary Education    | 5.46    | No                                               | 59.01   |
|                                 | High School            | 31.53   | Yes, one                                         | 35.61   |
|                                 | Degree                 | 42.62   | Yes, more than one                               | 5.37    |
|                                 | Master                 | 13.29   | No                                               | 75.83   |
| <b>Occupation of HCW</b>        | PhD                    | 3.23    | Yes                                              | 24.16   |
|                                 | Qualified job          | 36.13   | Nurse                                            | 30,64   |
|                                 | Non qualified job      | 3.59    | Physician                                        | 21,70   |
|                                 | Job in Healthcare      | 9.06    | Others (including working on a private pharmacy) | 12,88   |
|                                 | Home/people care       | 4.82    | Technician                                       | 11,50   |
|                                 |                        |         |                                                  |         |

|                                               |                            |       |                          |      |
|-----------------------------------------------|----------------------------|-------|--------------------------|------|
|                                               | Self-employed              | 9.02  | Administrative personnel | 9,99 |
|                                               | Company owner              | 4.27  | Nurse assistant          | 9,60 |
|                                               | Unemployed                 | 5.09  | Researcher               | 2,52 |
|                                               | Other                      | 27.97 | Caretaker                | 0,55 |
| <b>Care of someone</b>                        | No                         | 39.75 | Cleaning personnel       | 0,29 |
|                                               | Yes, of people of <16 y.o. | 24.81 | Kitchen personnel        | 0,25 |
|                                               | Yes, of people of >16 y.o. | 12.24 | Laundry personnel        | 0,08 |
|                                               | Yes, siblings              | 1.26  |                          |      |
|                                               | Yes, parents               | 15.11 |                          |      |
|                                               | Yes, others                | 6.82  |                          |      |
| <b>Burden of care (in n options selected)</b> | none                       | 43.80 |                          |      |
|                                               | 1                          | 24.81 |                          |      |
|                                               | 2                          | 26.60 |                          |      |
|                                               | 3                          | 4.36  |                          |      |
|                                               | 4                          | 0.38  |                          |      |
|                                               | 5                          | 0.03  |                          |      |

2

Table 2: Impact of the pandemic on the General population.

| ANSWER CATEGORIES                                              | TOTAL % | ANSWER CATEGORIES                | TOTAL % |
|----------------------------------------------------------------|---------|----------------------------------|---------|
| No                                                             | 75.12   | No, I am forced to go to work    | 0.40    |
| Yes, the company made a labour force adjustment plan           | 0.18    | No, I need to work               | 0.94    |
| Yes, the company made a temporary labour force adjustment plan | 9.78    | No, I work on essential services | 13.32   |
| Yes, I have lost some jobs previously contracted/arranged      | 5.75    | Yes                              | 55.19   |
| Yes, I was fired                                               | 0.88    | Yes, teleworking                 | 30.13   |
| Yes, others                                                    | 8.29    | <b>Afraid</b> No                 | 26.86   |

|                                                    |                                                            |                         |                                                    |                                  |                    |       |
|----------------------------------------------------|------------------------------------------------------------|-------------------------|----------------------------------------------------|----------------------------------|--------------------|-------|
|                                                    | Yes                                                        | 60.66                   |                                                    | Yes, going shopping              | 17.30              |       |
| <b>Spending less</b>                               | A little                                                   | 22.09                   |                                                    | Yes, to infect others            | 22.12              |       |
|                                                    | No                                                         | 17.23                   |                                                    | Yes, to get infected             | 33.70              |       |
|                                                    | <b>Seek for social assistance /or any other assistance</b> | No                      | 91.00                                              | <b>Afraid to infect</b>          | Elders             | 35.76 |
|                                                    | Not yet, but will need to                                  | 5.00                    |                                                    |                                  | Anyone             | 49.28 |
|                                                    | Yes                                                        | 4.00                    |                                                    |                                  | Children           | 13.20 |
| <b>Contact with someone infected by SARS-CoV-2</b> | I do not know                                              | 80.15                   |                                                    |                                  | Colleagues at work | 1.74  |
|                                                    | yes, with a probable non-confirmed case                    | 9.83                    |                                                    |                                  | No                 | 57.94 |
|                                                    | Yes, with a confirmed case                                 | 10.01                   |                                                    |                                  | Yes, alcohol       | 5.92  |
|                                                    | No                                                         | 26.18                   | <b>Increased substance use</b>                     | Yes, food                        | 24.26              |       |
| Headache                                           | 16.01                                                      | Yes, illegal drugs      |                                                    | 0.40                             |                    |       |
| Sore throat                                        | 9.85                                                       | Yes, drugs to calm down |                                                    | 4.15                             |                    |       |
| <b>Presence of symptoms (since February)</b>       | Nasal congestion/running nose                              | 9.17                    |                                                    | Yes, tobacco                     | 7.29               |       |
|                                                    | Extreme fatigue/tiredness                                  | 6.91                    | <b>Media to get information about the pandemic</b> | Social media                     | 29.23              |       |
|                                                    | Persistent cough (for one week or more)                    | 6.84                    |                                                    | TV                               | 36.77              |       |
|                                                    | Muscle pain                                                | 6.20                    |                                                    | Radio                            | 15.45              |       |
|                                                    | Diarrhea                                                   | 5.36                    |                                                    | Newspapers                       | 13.54              |       |
|                                                    | Dizziness                                                  | 2.85                    |                                                    | Other                            | 4.99               |       |
|                                                    | Shortness of breath                                        | 2.19                    |                                                    | It's ok                          | 18.98              |       |
|                                                    | Chest pain                                                 | 1.90                    |                                                    | The Government explains too much | 3.23               |       |
|                                                    | Loss of smell, smell blindness                             | 1.86                    | <b>Thoughts about the information received</b>     | The Government explains too less | 8.93               |       |
|                                                    | Persistent fever (for one week or more)                    | 1.63                    |                                                    | Media explain too much           | 12.78              |       |
| Loss of appetite/weight                            | 1.31                                                       | Media explain too less  |                                                    | 2.91                             |                    |       |
| Loss of taste                                      | 1.66                                                       |                         | Too negative                                       | 20.92                            |                    |       |



|                                                                                         |                                                                         |       |                                             |            |            |            |     |
|-----------------------------------------------------------------------------------------|-------------------------------------------------------------------------|-------|---------------------------------------------|------------|------------|------------|-----|
|                                                                                         | 1                                                                       | 40.03 | Poorly adjusted to the reality              | 26.82      |            |            |     |
| <b>N of symptoms</b>                                                                    | 2                                                                       | 23.76 | I do not think anything about it            | 5.41       |            |            |     |
|                                                                                         | 3                                                                       | 14.68 | No                                          | 21.43      |            |            |     |
|                                                                                         | 4                                                                       | 8.34  | Yes, my personality                         | 4.78       |            |            |     |
|                                                                                         |                                                                         |       | Yes, my vision of the society/ how we lived | 50.41      |            |            |     |
| <b>How did they feel when answering the questionnaire</b>                               | Well                                                                    | 66.50 | Yes, my life                                | 23.36      |            |            |     |
|                                                                                         | Normal                                                                  | 22.50 | <b>Score</b>                                | <b>50%</b> | <b>90%</b> | <b>95%</b> |     |
|                                                                                         | Not at 100%                                                             | 10.60 | Anxiety                                     | 2          | ≥10        | ≥16        |     |
|                                                                                         | Bad                                                                     | 0.42  | Stress                                      | 8          | ≥24        | ≥28        |     |
| <b>Use of healthcare resources put in place in the context of the COVID-19 pandemic</b> | None                                                                    | 64.25 | <b>Scores results per percentiles</b>       | Depression | 4          | ≥16        | ≥20 |
|                                                                                         | Have used an app set up for management of COVID cases                   | 21.51 |                                             |            |            |            |     |
|                                                                                         | Have called a telephone number set up for the management of COVID cases | 5.60  | PSTD                                        | 17         | ≥46        | ≥54        |     |
|                                                                                         | Have been to a public healthcare center (including GP)                  | 3.77  |                                             |            |            |            |     |
|                                                                                         | Have been tested                                                        | 1.82  |                                             |            |            |            |     |
|                                                                                         | Have been to private doctor/healthcare center                           | 1.60  |                                             |            |            |            |     |
| <b>For those tested, result of the test</b>                                             | Have gone to the emergency room                                         | 1.42  |                                             |            |            |            |     |
|                                                                                         | Negative                                                                | 57.76 |                                             |            |            |            |     |
|                                                                                         | Positive                                                                | 42.23 |                                             |            |            |            |     |

Table 3: Impact of the pandemic on the HCW

| ANSWER CATEGORIES                                    |                                                                                                                                        | TOTAL %                                                                                                               | ANSWER CATEGORIES                                                               |                                                                                                            | TOTAL % |      |
|------------------------------------------------------|----------------------------------------------------------------------------------------------------------------------------------------|-----------------------------------------------------------------------------------------------------------------------|---------------------------------------------------------------------------------|------------------------------------------------------------------------------------------------------------|---------|------|
| <b>Having worked directly with COVID-19 patients</b> | No                                                                                                                                     | 58.34                                                                                                                 | No                                                                              |                                                                                                            | 56.29   |      |
|                                                      | Yes                                                                                                                                    | 41.65                                                                                                                 | No, I follow protocols                                                          |                                                                                                            | 25.09   |      |
| <b>Fear of working with COVID-19 patients</b>        | No                                                                                                                                     | 24.13                                                                                                                 | <b>Ethical concerns</b>                                                         | Yes, with selection of patients and/or protocols for selection of patients or therapeutic indications      | 9.41    |      |
|                                                      | Yes                                                                                                                                    | 75.87                                                                                                                 |                                                                                 | Yes, others                                                                                                | 9.19    |      |
| <b>Fear of working with COVID-19 patients</b>        | No fear                                                                                                                                | 14.58                                                                                                                 | Having worked without sufficient protection                                     |                                                                                                            | 25.68   |      |
|                                                      | Scared of transmitting the virus to other non-COVID patients                                                                           | 14.95                                                                                                                 | With patients triage or protocols for patients triage or therapeutic indication |                                                                                                            | 16.28   |      |
|                                                      | Scared of transmitting the virus to own people (family, colleagues)                                                                    | 42.90                                                                                                                 | With the protocol for case management.                                          |                                                                                                            | 11.46   |      |
|                                                      | Scared of being obliged to take medical decisions representing an ethical dilemma for me (patient selection, application of protocols) | 6.26                                                                                                                  | With the protocol for End-of-Life management                                    |                                                                                                            | 8.94    |      |
|                                                      | Scared of being infected                                                                                                               | 17.01                                                                                                                 | <b>Problems faced by healthcare professionals, grouped</b>                      | With institution management or orders from superiors.                                                      |         | 8.02 |
|                                                      | Afraid of dying                                                                                                                        | 4.27                                                                                                                  |                                                                                 | With the disjunctive of having to/wanting to go to work at first line and not being able/wanting to do it. |         | 6.88 |
|                                                      |                                                                                                                                        |                                                                                                                       |                                                                                 | With the prioritization of dispensing protective material (facial masks, EPIs) or tests.                   |         | 5.27 |
|                                                      |                                                                                                                                        | With the impact of the outbreak and/or lockdown on some populations (chronic or mental health patients, elders, etc.) |                                                                                 | 3.89                                                                                                       |         |      |
|                                                      |                                                                                                                                        | Others (non-specified)                                                                                                |                                                                                 | 3.89                                                                                                       |         |      |

1  
2  
3  
4  
5  
6  
7  
8  
9  
10  
11  
12  
13  
14  
15  
16  
17  
18  
19  
20  
21  
22  
23  
24  
25  
26  
27  
28  
29  
30  
31  
32  
33  
34  
35  
36  
37  
38  
39  
40  
41  
42  
43  
44  
45  
46  
47  
48  
49  
50  
51  
52  
53  
54  
55  
56  
57  
58  
59  
60

|                                                                                                                                       |      |
|---------------------------------------------------------------------------------------------------------------------------------------|------|
| With problems due to the<br>organizational changes.                                                                                   | 3.66 |
| With management of<br>information given to<br>patients/their families, and<br>related problems (including<br>confidentiality issues). | 3.44 |
| With colleagues attitudes                                                                                                             | 2.52 |

2

For peer review only

Table 4: *Conditions statistically associated to the mental-health scores results.*

| Factors:                                                                                                                          | Statistically association to: |               |              |            |                 |                 |                    |
|-----------------------------------------------------------------------------------------------------------------------------------|-------------------------------|---------------|--------------|------------|-----------------|-----------------|--------------------|
|                                                                                                                                   | Depression Index              | Anxiety Index | Stress Index | PSTD Index | Evitation Index | Intrusion Index | Hyperarousal Index |
| Risk                                                                                                                              | p                             | p             | p            | p          | p               | p               | p                  |
| Women                                                                                                                             | 0.019                         | 0.003         |              | 0.000      | 0.007           | 0.034           | 0.027              |
| <42 y.o.                                                                                                                          |                               | 0.008         |              |            |                 |                 |                    |
| Caregivers                                                                                                                        |                               | 0.002         | 0.039        | 0.006      |                 | 0.050           |                    |
| Adults with higher perception of the difficulty of quarantine for children and the whole family (score in a 10-points scale) vs 0 |                               |               |              | 0.041      |                 | 0.032           | 0.022              |
| Living in a middle-high density population town                                                                                   |                               | 0.031         |              |            |                 |                 |                    |
| Living in a shared apartment/house                                                                                                |                               | 0.006         |              |            |                 |                 |                    |
| Living in a rented room                                                                                                           |                               | 0.039         |              |            |                 |                 |                    |
| Declaring to be homeless                                                                                                          |                               |               |              | 0.044      |                 |                 |                    |
| High deprivation index (>10)                                                                                                      |                               | 0.015         |              |            |                 |                 |                    |
| Going to work because job on essential services                                                                                   |                               | 0.011         |              |            |                 |                 |                    |
| Being a healthcare worker and to be afraid of attending COVID-19 patients                                                         | 0.017                         |               |              |            | 0.023           |                 |                    |
| To have been in contact with a COVID-19 patient                                                                                   |                               | 0.006         |              | 0.038      |                 |                 |                    |
| Having had symptoms compatible with COVID-19                                                                                      | 0.021                         | 0.002         |              | 0.008      |                 |                 |                    |
| Having used all healthcare resources put in place in the context of the COVID-19 pandemic                                         |                               |               | 0.039        | 8641,000   | 0.007           |                 | 0.011              |
| To be afraid (of getting infected, to infect others, to go shopping)                                                              |                               | 0.000         | 0.036        | 0.000      | 0.003           | 0.012           | 0.006              |
| To have increased the consume of at least one substance                                                                           |                               | 0.006         |              | 0.008      |                 |                 |                    |

To use 3 media to get  
information about COVID-  
19

0.033

| <b>Protection</b>       | <b>p</b> |
|-------------------------|----------|----------|----------|----------|----------|----------|----------|
| >61 y.o.                |          | 0.006    |          | 0.05     |          |          |          |
| To be married           |          | 0.007    |          |          |          |          |          |
| Being a widow           |          |          |          | 0.020    | 0.011    |          |          |
| To have a qualified job |          | 0.008    |          |          |          |          |          |
| To have a PhD           | 0.019    | 0.010    |          |          | 0.031    |          |          |
| Feeling well            |          | 0.045    |          | 0.037    |          |          |          |

2

| General demography                                                                                                                                                                                                                                                                                             |                                                                                                                                                                                                                                                                                                                  |
|----------------------------------------------------------------------------------------------------------------------------------------------------------------------------------------------------------------------------------------------------------------------------------------------------------------|------------------------------------------------------------------------------------------------------------------------------------------------------------------------------------------------------------------------------------------------------------------------------------------------------------------|
| How old are you?                                                                                                                                                                                                                                                                                               |                                                                                                                                                                                                                                                                                                                  |
| Which gender do you identify with?                                                                                                                                                                                                                                                                             | male, female, non binary, I prefer not to say                                                                                                                                                                                                                                                                    |
| In which country do you live?                                                                                                                                                                                                                                                                                  |                                                                                                                                                                                                                                                                                                                  |
| In which postal code do you live?                                                                                                                                                                                                                                                                              |                                                                                                                                                                                                                                                                                                                  |
| How would you define your civil status?                                                                                                                                                                                                                                                                        | single, married, divorced, widow, in a couple                                                                                                                                                                                                                                                                    |
| 1 Where do you live?                                                                                                                                                                                                                                                                                           | my own house/apartment, shared house/apartment, in a rented room, institutionalized, I am homeless                                                                                                                                                                                                               |
| 2 What level of education do you have? (check the maximum obtained)                                                                                                                                                                                                                                            | primary education, secondary education, further education, bachelor degree, masters degree, doctoral degree                                                                                                                                                                                                      |
| 3 What is your job?                                                                                                                                                                                                                                                                                            | skilled job, unskilled job, caring for others/home, I have a company, I am self-employed, I am a healthcare worker (or working in a healthcare setting, I am unemployed, others                                                                                                                                  |
| Questions for the Scale of socio-economic precariousness                                                                                                                                                                                                                                                       |                                                                                                                                                                                                                                                                                                                  |
| 4 For index scoring, sum of all points multiplied by 2.                                                                                                                                                                                                                                                        |                                                                                                                                                                                                                                                                                                                  |
| 5 Who provides financially at home?                                                                                                                                                                                                                                                                            | >2 of us = 0 p, 2 of us = 1 p, only me = 2p                                                                                                                                                                                                                                                                      |
| 6 Have you lost your job due to the COVID-19 outbreak?                                                                                                                                                                                                                                                         | no = 0 p; yes, the company made a temporary labour force adjustment plan = 1 p; yes, others = 1.5 p; yes, I was fired/the company made a labour force adjustment plan/ I have lost some jobs previously contracted/arranged = 2 p                                                                                |
| 7 Do you have savings?                                                                                                                                                                                                                                                                                         | yes = 0 p, yes, some = 1 p, no = 2 p                                                                                                                                                                                                                                                                             |
| 8 Do you have a mortgage to pay?                                                                                                                                                                                                                                                                               | no = 0 p; yes, one = 1 p; yes, more than 1 = 2 p                                                                                                                                                                                                                                                                 |
| 9 Do you have rent to pay?                                                                                                                                                                                                                                                                                     | no = 0 p, yes = 2 p                                                                                                                                                                                                                                                                                              |
| 10 Are you spending less since the COVID-19 outbreak?                                                                                                                                                                                                                                                          | no = 0 p; a little = 1 p; yes = 2 p                                                                                                                                                                                                                                                                              |
| 11 Have you asked for social assistance or for any other assistance due to the COVID-19 outbreak?                                                                                                                                                                                                              | no = 0 p; no, but will have to = 1 p; yes = 2 p                                                                                                                                                                                                                                                                  |
| 12 Do you have to take care of somebody? (multiple choice question)                                                                                                                                                                                                                                            | no = 0 p; yes (any answer: children <16 y.o., >16 y.o, parents, siblings, others) = 1 p per positive answer.                                                                                                                                                                                                     |
| Habits and COVID-19-related health status during confinement                                                                                                                                                                                                                                                   |                                                                                                                                                                                                                                                                                                                  |
| 13 If having children: In which grade do you think the confinement is being difficult for children (and therefore for the family)?                                                                                                                                                                             | scale of potential answer, 0 being= not at all and 10= a lot                                                                                                                                                                                                                                                     |
| 14 Are you staying at home, during this time?                                                                                                                                                                                                                                                                  | yes; yes, I am teleworking; no, I work in essential services; no, I need to work; no, my employer does not allow me to                                                                                                                                                                                           |
| 15 Are you scared or worried?                                                                                                                                                                                                                                                                                  | no; yes, of getting infected; yes, of going to the shops; yes, of infecting others; yes, that people close to me get infected                                                                                                                                                                                    |
| 16 Who are you scared of infecting?                                                                                                                                                                                                                                                                            | the children, my parents/close elderly people; my colleagues; anyone                                                                                                                                                                                                                                             |
| 17 Do you think you are consuming more since the outbreak began?                                                                                                                                                                                                                                               | no; yes, I eat more; yes, I drink more (alcoholic drinks); yes, I smoke more; yes, I consume more illegal drugs; yes, I consume more drugs to calm myself down (sleeping pills, muscle relaxants, tranquilizers)                                                                                                 |
| 18 Through which channel do you receive information about the outbreak?                                                                                                                                                                                                                                        | TV; Radio; Newspaper; Social media (Whatsapp, Twitter, Telegram etc.); Other channels                                                                                                                                                                                                                            |
| 19 It's too much: I would like the Government to explain less; It's too little: I would like the media to explain more; It's too little: I would like the media to explain more; It's too negative/too sensationalist; I think it's poorly adjusted to reality; It's alright; I do not think anything about it |                                                                                                                                                                                                                                                                                                                  |
| 20 What do you think of the information you are receiving?                                                                                                                                                                                                                                                     | no; yes, my life has changed; yes, my personality had changed; yes, the way I see society/the way we lived                                                                                                                                                                                                       |
| 21 Do you think this situation has changed you?                                                                                                                                                                                                                                                                | yes, with a confirmed case (test positive); yes, with a probable non-confirmed case (test negative or test not done); I do not know                                                                                                                                                                              |
| 22 Have you been in contact with someone infected by SARS-CoV-2?                                                                                                                                                                                                                                               | no; persistent cough (for one week or more); headache; persistent fever (for one week or more); extreme fatigue/tiredness; sore throat; muscle pain; loss of appetite/weight; loss of smell, smell blindness; loss of taste; diarrhea; dizziness; shortness of breath; chest pain; nasal congestion/running nose |
| 23 Since February, have you had any of these symptoms?                                                                                                                                                                                                                                                         | well, normal, I do not feel at 100%, bad                                                                                                                                                                                                                                                                         |
| 24 How do you feel now?                                                                                                                                                                                                                                                                                        | have called a telephone number set up for the management of COVID cases; have gone to the emergency room; have used an app set up for management of COVID cases; have been to a public healthcare center (including GP); have been to private doctor/healthcare center; have been tested; none of the above      |
| 25 In the last 14 days, have you used any healthcare resources put in place for the COVID-19 pandemic?                                                                                                                                                                                                         | positive, negative                                                                                                                                                                                                                                                                                               |
| For HealthCare workers                                                                                                                                                                                                                                                                                         |                                                                                                                                                                                                                                                                                                                  |
| 26 What is your job?                                                                                                                                                                                                                                                                                           | physician, nurse, nurse assistant, technician, caretaker, researcher, kitchen personnel, cleaning personnel, administrative personnel, others                                                                                                                                                                    |
| 27 Have you been working with COVID patients directly?                                                                                                                                                                                                                                                         | no; not as far as I know; yes, I have been/am in a COVID team; yes, on duty                                                                                                                                                                                                                                      |
| 28 Are you scared of working with COVID patients?                                                                                                                                                                                                                                                              | no; yes, o being infected; yes, of dying; yes, of transmitting the virus to other non-COVID patients; yes, of transmitting the virus to my people (family/colleagues); yes, of being obliged to take medical decisions representing an ethical dilemma for me (patient selection, application of protocols)      |
| 29 no; no, I think I need to follow the protocols; yes, with selection of patients and/or protocols for selection of patients or therapeutic indications; yes, others                                                                                                                                          |                                                                                                                                                                                                                                                                                                                  |
| 30 Have you had ethical concerns while working?                                                                                                                                                                                                                                                                |                                                                                                                                                                                                                                                                                                                  |
| Questions related to mental-health                                                                                                                                                                                                                                                                             |                                                                                                                                                                                                                                                                                                                  |
| Scoring                                                                                                                                                                                                                                                                                                        |                                                                                                                                                                                                                                                                                                                  |
| 31 For each of the questions below: never = 0 p, sometimes = 1 p, often = 2 p, almost always = 3 p. For the index scoring, sum of all points multiplied by 2.                                                                                                                                                  |                                                                                                                                                                                                                                                                                                                  |
| 32 Questions related to anxiety- How these sentences apply to you?                                                                                                                                                                                                                                             |                                                                                                                                                                                                                                                                                                                  |
| 33 last week I was aware of dryness of my mouth                                                                                                                                                                                                                                                                |                                                                                                                                                                                                                                                                                                                  |
| 34 last week I experienced breathing difficulty (excessively rapid breathing, breathlessness in the absence of any physical exertion and absence of any)                                                                                                                                                       |                                                                                                                                                                                                                                                                                                                  |
| 35 last week I experienced trembling (eg in the hands)                                                                                                                                                                                                                                                         |                                                                                                                                                                                                                                                                                                                  |
| 36 last week I was worried about situations in which I might panic and make a fool of myself                                                                                                                                                                                                                   |                                                                                                                                                                                                                                                                                                                  |
| 37 last week I felt I was close to panic                                                                                                                                                                                                                                                                       |                                                                                                                                                                                                                                                                                                                  |
| 38 last week I was aware of the action of my heart in the absence of physical exertions (sense of heart rate increase, heart missing a beat)                                                                                                                                                                   |                                                                                                                                                                                                                                                                                                                  |
| 39 last week I felt scared without any good reason                                                                                                                                                                                                                                                             |                                                                                                                                                                                                                                                                                                                  |
| 40 Questions related to stress- How these sentences apply to you?                                                                                                                                                                                                                                              | For each of the questions below: never = 0 p, sometimes = 1 p, often = 2 p, almost always = 3 p. For the index scoring, sum of all points multiplied by 2.                                                                                                                                                       |
| 41 last week I found it hard to wind down                                                                                                                                                                                                                                                                      |                                                                                                                                                                                                                                                                                                                  |
| 42 last week I tended to over-react to situations                                                                                                                                                                                                                                                              |                                                                                                                                                                                                                                                                                                                  |
| 43 last week I felt that I was using a lot of nervous energy                                                                                                                                                                                                                                                   |                                                                                                                                                                                                                                                                                                                  |
| 44 last week I found myself getting agitated                                                                                                                                                                                                                                                                   |                                                                                                                                                                                                                                                                                                                  |
| 45 last week I found it difficult to relax                                                                                                                                                                                                                                                                     |                                                                                                                                                                                                                                                                                                                  |
| 46 last week I was intolerant of anything that kept me from getting on with what I was doing                                                                                                                                                                                                                   |                                                                                                                                                                                                                                                                                                                  |
| 47 last week I felt that I was rather touchy                                                                                                                                                                                                                                                                   |                                                                                                                                                                                                                                                                                                                  |
| 48 Questions related to depression- How these sentences apply to you?                                                                                                                                                                                                                                          | For each of the questions below: never = 0 p, sometimes = 1 p, often = 2 p, almost always = 3 p. For the index scoring, sum of all points multiplied by 2.                                                                                                                                                       |
| 49 last week I couldn't seem to experience any positive feeling at all                                                                                                                                                                                                                                         |                                                                                                                                                                                                                                                                                                                  |
| 50 last week I found it difficult to work up the initiative to do things                                                                                                                                                                                                                                       |                                                                                                                                                                                                                                                                                                                  |
| 51 last week I felt that I had nothing to look forward to                                                                                                                                                                                                                                                      |                                                                                                                                                                                                                                                                                                                  |
| 52 last week I felt down-hearted and blue                                                                                                                                                                                                                                                                      |                                                                                                                                                                                                                                                                                                                  |
| 53 last week I was unable to become enthusiastic about anything                                                                                                                                                                                                                                                |                                                                                                                                                                                                                                                                                                                  |
| 54 last week I felt that life was meaningless                                                                                                                                                                                                                                                                  |                                                                                                                                                                                                                                                                                                                  |
| 55 Questions related to PSTD symptoms- How these sentences apply to you?                                                                                                                                                                                                                                       | For each of the questions below: 0= not at all, 1= a little bit, 2= moderately, 3= quite a bit, 4=extremely. For the index scoring, sum of all points multiplied by 2.                                                                                                                                           |
| 56 Questions related to Intrusion symptoms                                                                                                                                                                                                                                                                     |                                                                                                                                                                                                                                                                                                                  |
| 57 last week any reminder brought back feelings about it                                                                                                                                                                                                                                                       |                                                                                                                                                                                                                                                                                                                  |
| 58 last week I had trouble staying asleep                                                                                                                                                                                                                                                                      |                                                                                                                                                                                                                                                                                                                  |
| 59 last week other things kept making me think about it.                                                                                                                                                                                                                                                       |                                                                                                                                                                                                                                                                                                                  |
| 60 last week I thought about it when I didn't mean to                                                                                                                                                                                                                                                          |                                                                                                                                                                                                                                                                                                                  |
| 61 last week Pictures about it popped into my mind                                                                                                                                                                                                                                                             |                                                                                                                                                                                                                                                                                                                  |
| 62 last week I found myself acting or feeling like I was back at that time                                                                                                                                                                                                                                     |                                                                                                                                                                                                                                                                                                                  |
| 63 last week I had waves of strong feelings about it                                                                                                                                                                                                                                                           |                                                                                                                                                                                                                                                                                                                  |
| 64 Questions related to Avoidance symptoms                                                                                                                                                                                                                                                                     |                                                                                                                                                                                                                                                                                                                  |
| 65 last week I avoided letting myself get upset when I thought about it or was reminded of it                                                                                                                                                                                                                  |                                                                                                                                                                                                                                                                                                                  |
| 66 last week I felt as if it hadn't happened or wasn't real                                                                                                                                                                                                                                                    |                                                                                                                                                                                                                                                                                                                  |
| 67 last week I stayed away from reminders of it.                                                                                                                                                                                                                                                               |                                                                                                                                                                                                                                                                                                                  |
| 68 last week I thought about it when I didn't mean to                                                                                                                                                                                                                                                          |                                                                                                                                                                                                                                                                                                                  |
| 69 last week I was aware that I still had a lot of feelings about it, but I didn't deal with them                                                                                                                                                                                                              |                                                                                                                                                                                                                                                                                                                  |
| 70 last week My feelings about it were kind of numb                                                                                                                                                                                                                                                            |                                                                                                                                                                                                                                                                                                                  |
| 71 last week I tried to remove it from my memory                                                                                                                                                                                                                                                               |                                                                                                                                                                                                                                                                                                                  |
| 72 last week I tried not to talk about it                                                                                                                                                                                                                                                                      |                                                                                                                                                                                                                                                                                                                  |
| 73 Questions related to Hyperarousal symptoms                                                                                                                                                                                                                                                                  |                                                                                                                                                                                                                                                                                                                  |
| 74 last week I felt irritable and angry.                                                                                                                                                                                                                                                                       |                                                                                                                                                                                                                                                                                                                  |
| 75 last week I was jumpy and easily startled                                                                                                                                                                                                                                                                   |                                                                                                                                                                                                                                                                                                                  |
| 76 last week I had trouble falling asleep                                                                                                                                                                                                                                                                      |                                                                                                                                                                                                                                                                                                                  |
| 77 last week I had trouble concentrating                                                                                                                                                                                                                                                                       |                                                                                                                                                                                                                                                                                                                  |
| 78 last week I felt watchful and on-guard                                                                                                                                                                                                                                                                      |                                                                                                                                                                                                                                                                                                                  |

|                                                     | Conditional distributions given the responders gender (%)      |          |          |        | Conditional distributions given the responders age range (%) |            |            |          | p     |        |
|-----------------------------------------------------|----------------------------------------------------------------|----------|----------|--------|--------------------------------------------------------------|------------|------------|----------|-------|--------|
|                                                     | women                                                          | men      | BMJ Open | vs men | <42 y.o.                                                     | 42-52 y.o. | 52-61 y.o. | >61 y.o. |       |        |
| 1 Civil status                                      | Married                                                        | 51.04    | 60.21    | 14.77  | 27.94                                                        | 32.2       | 56.74      | 61.12    | 63.22 |        |
|                                                     | Divorced                                                       | 11.75    | 7.94     | 5.68   | 16.17                                                        | 2.52       | 11.33      | 15.14    | 13.08 |        |
|                                                     | In couple                                                      | 18.40    | 17.39    | 30.77  | 23.52                                                        | 38.02      | 18.34      | 10.91    | 6.85  |        |
|                                                     | Single                                                         | 14.51    | 12.89    | 38.63  | 30.88                                                        | 27.15      | 12.85      | 10.06    | 7.2   |        |
|                                                     | Widow                                                          | 4.18     | 1.54     | 1.13   | 1.47                                                         | 0.08       | 0.71       | 2.75     | 9.63  |        |
| 2 Housing                                           | Owned apartment/house                                          | 91.08    | 90.89    | 64.36  | 72.46                                                        | 79.44      | 94.22      | 95.08    | 94.48 |        |
|                                                     | Shared apartment/house                                         | 7.7      | 7.9      | 26.43  | 23.18                                                        | 18.43      | 4.9        | 4.11     | 4.33  |        |
|                                                     | Rented room                                                    | 1.05     | 1.07     | 8.04   | 0.00                                                         | 2.01       | 0.81       | 0.67     | 0.83  | p<0.01 |
|                                                     | Centre/institution                                             | 0.13     | 0.09     | 0.00   | 0.00                                                         | 0.05       | 0.03       | 0.09     | 0.3   |        |
|                                                     | Homeless                                                       | 0.02     | 0.03     | 1.14   | 4.34                                                         | 0.05       | 0.01       | 0.02     | 0.03  |        |
| 3 Maximum Education Degree                          | Primary Education                                              | 3.52     | 4.63     | 5.68   | 5.79                                                         | 1.53       | 3.3        | 4.24     | 6.1   |        |
|                                                     | Secondary Education                                            | 5.18     | 6.17     | 3.4    | 1.44                                                         | 4.83       | 4.49       | 5.19     | 7.19  |        |
|                                                     | High School                                                    | 29.92    | 35.46    | 29.54  | 28.98                                                        | 27.54      | 30.98      | 34.17    | 33.11 | p<0.01 |
|                                                     | Degree                                                         | 44.99    | 36.96    | 31.81  | 33.33                                                        | 38.72      | 43.92      | 43.48    | 44.26 |        |
|                                                     | Master                                                         | 13.47    | 12.77    | 26.13  | 21.73                                                        | 24.32      | 14.3       | 9.7      | 5.65  |        |
| 4 Employment                                        | PhD                                                            | 2.9      | 3.98     | 3.4    | 8.69                                                         | 3.03       | 2.99       | 3.2      | 3.67  |        |
|                                                     | Qualified job                                                  | 36.95    | 34.15    | 35.22  | 37.68                                                        | 48.19      | 48.76      | 41.3     | 7.86  |        |
|                                                     | Non qualified job                                              | 3.51     | 3.78     | 9.09   | 2.89                                                         | 4.39       | 4.46       | 4.49     | 1.15  |        |
|                                                     | Job in Healthcare                                              | 10.9     | 4.67     | 9.09   | 1.44                                                         | 12.16      | 10.58      | 9.21     | 4.64  |        |
|                                                     | Home/people care                                               | 6.24     | 1.42     | 0.00   | 2.89                                                         | 0.94       | 1.69       | 3.25     | 12.86 | 0-0.01 |
| 5 Self-employed                                     | Self-employed                                                  | 8.03     | 11.41    | 9.09   | 15.94                                                        | 7.72       | 11.45      | 11.4     | 5.59  |        |
|                                                     | Company owner                                                  | 3.00     | 7.36     | 1.13   | 1.44                                                         | 2.39       | 5.66       | 5.9      | 3.05  |        |
|                                                     | Unemployed                                                     | 5.29     | 4.54     | 12.5   | 11.59                                                        | 7.63       | 4.62       | 5.61     | 2.69  |        |
|                                                     | Other                                                          | 26.03    | 32.63    | 23.86  | 26.08                                                        | 16.54      | 12.73      | 18.8     | 62.13 |        |
|                                                     | >2                                                             | 8.03     | 7.05     | 14.77  | 16.41                                                        | 13.59      | 3.99       | 7.26     | 6.43  |        |
| 6 People financially providing at home              | >2                                                             | 66.29    | 68.57    | 54.54  | 55.22                                                        | 70.39      | 71.65      | 64.94    | 61.18 |        |
|                                                     | 1                                                              | 25.67    | 24.37    | 30.68  | 28.35                                                        | 16012.00   | 24.35      | 27.78    | 32.38 |        |
|                                                     | No                                                             | 16.55    | 47.61    | 58.94  | 34.66                                                        | 45.98      | 16.26      | 31.39    | 67.82 |        |
|                                                     | Yes, of people of <16 y.o.                                     | 25.99    | 21.93    | 13.68  | 25.33                                                        | 33.96      | 48.69      | 13.52    | 3.07  |        |
|                                                     | Yes, of people of >16 y.o.                                     | 13.02    | 10.35    | 6.31   | 6.66                                                         | 4.81       | 12.58      | 23.54    | 6.73  |        |
| 7 Care of someone                                   | Yes, parents                                                   | 13.56    | 0.96     | 4.21   | 2.66                                                         | 1.57       | 0.86       | 1.33     | 1.28  | <0.01  |
|                                                     | Yes, siblings                                                  | 16.1     | 12.66    | 10.52  | 17.33                                                        | 8.41       | 16.92      | 23.03    | 10.92 |        |
|                                                     | Yes, others                                                    | 6.95     | 6.46     | 6.31   | 13.33                                                        | 5.24       | 4.66       | 7.17     | 10.16 |        |
|                                                     | None                                                           | 40.62    | 51.34    |        |                                                              | 48.85      | 18.85      | 35.96    | 70.47 |        |
|                                                     | 1 option selected                                              | 25.9     | 22.11    | 11.3   | 5.79                                                         | 13.12      | 21.03      | 39.98    | 24.24 |        |
| 8 Burden of care                                    | 2 options selected                                             | 28.23    | 22.83    |        |                                                              | 34.82      | 49.43      | 19.32    | 4.51  | <0.01  |
|                                                     | 3 options selected                                             | 4.77     | 3.39     |        |                                                              | 2.82       | 9.88       | 4.31     | 0.61  |        |
|                                                     | 4 options selected                                             | 0.41     | 0.30     |        |                                                              | 0.31       | 0.73       | 0.38     | 0.11  |        |
|                                                     | 5 options selected                                             | 0.04     | 0.01     |        |                                                              | 0.04       | 0.04       | 0.02     | 0.02  |        |
|                                                     | No                                                             | 76.13    | 72.73    | 63.63  | 65.21                                                        | 68.4       | 69.41      | 73.65    | 88.18 |        |
| 9 Loss of job                                       | Yes, the company made a labour force adjustment plan           | 0.18     | 0.17     | 0.00   | 0.00                                                         | 0.22       | 0.26       | 0.15     | 0.09  |        |
|                                                     | Yes, the company made a temporary labour force adjustment plan | 9.70     | 10.01    | 9.09   | 7.24                                                         | 14.5       | 13.04      | 9.9      | 2.17  | <0.01  |
|                                                     | Yes, I have lost some jobs previously contracted/arranged      | 4.93     | 7.61     | 15.9   | 14.49                                                        | 6.75       | 7.17       | 6.68     | 2.54  |        |
|                                                     | Yes, I was fired                                               | 0.96     | 0.68     | 2.27   | 0.00                                                         | 1.79       | 0.96       | 0.67     | 0.16  |        |
|                                                     | Yes, others                                                    | 8.08     | 8.77     | 9.09   | 13.04                                                        | 8.3        | 9.12       | 8.93     | 6.83  |        |
| 10 Savings                                          | No                                                             | 22.00    | 18.00    | 30.00  | 26.00                                                        | 20.34      | 24.48      | 22.21    | 15.82 |        |
|                                                     | Yes                                                            | 34.00    | 40.00    | 23.00  | 28.00                                                        | 36.22      | 32.37      | 33.65    | 40.55 | <0.01  |
|                                                     | None                                                           | 44.00    | 42.00    | 48.00  | 46.00                                                        | 43.43      | 43.14      | 44.13    | 43.62 |        |
|                                                     | Yes, one                                                       | 58.75    | 59.47    | 80.68  | 57.97                                                        | 64.04      | 59.65      | 54.68    | 76.91 | <0.01  |
|                                                     | Yes, more than one                                             | 36.17    | 34.37    | 18.18  | 36.23                                                        | 31.76      | 50.8       | 39.81    | 20.66 | <0.01  |
| 11 Mortgage to pay                                  | No                                                             | 5.07     | 6.14     | 5.79   | 6.00                                                         | 4.18       | 5.44       | 5.49     | 2.43  |        |
|                                                     | Yes                                                            | 76.00    | 76.00    | 51.00  | 66.00                                                        | 56.64      | 75.05      | 83.23    | 87.08 |        |
|                                                     | Yes                                                            | 24.00    | 24.00    | 49.00  | 34.00                                                        | 43.35      | 24.94      | 16.76    | 12.91 | <0.01  |
|                                                     | Yes                                                            | 59.85    | 62.61    | 59.09  | 69.56                                                        | 64.15      | 58.86      | 60.4     | 59.52 |        |
|                                                     | Spending less                                                  | A little | 22.34    | 21.56  | 13.63                                                        | 17.39      | 19.89      | 23.74    | 22.72 | 21.87  |
| 12 No for social assistance/or any other assistance | No                                                             | 17.80    | 15.82    | 27.27  | 13.04                                                        | 15.95      | 17.38      | 16.87    | 18.59 |        |
|                                                     | Not yet, but will need to                                      | 91.42    | 90.8     | 80.68  | 81.15                                                        | 88.95      | 88.41      | 90.73    | 96.48 |        |
|                                                     | Yes                                                            | 4.71     | 5.19     | 10.22  | 8.69                                                         | 6.34       | 6.43       | 5.08     | 1.81  | <0.01  |
|                                                     | Yes                                                            | 3.85     | 3.99     | 9.09   | 10.14                                                        | 4.7        | 5.15       | 4.18     | 1.7   |        |
|                                                     | <7                                                             | 26.19    | 17.04    | 22.47  | 17.39                                                        | 21.17      | 30.35      | 26.04    | 22.72 |        |
| 13 Index of socio-economic situation -score         | 7-8.5                                                          | 20.00    | 10.22    | 20.12  | 10.14                                                        | 33.2       | 28.42      | 32.07    | 36.36 | <0.01  |
|                                                     | 8.5-10                                                         | 32.09    | 32.93    | 33.59  | 43.47                                                        | 17.38      | 18.8       | 19.27    | 24.3  |        |
|                                                     | >10                                                            | 21.71    | 39.77    | 23.8   | 28.98                                                        | 28.24      | 22.41      | 22.6     | 16.59 |        |
|                                                     | No, I am forced to go to work                                  | 0.33     | 0.55     | 2.29   | 1.44                                                         | 0.54       | 0.56       | 0.4      | 0.1   |        |
|                                                     | No, I need to work                                             | 0.69     | 1.51     | 1.14   | 1.44                                                         | 0.75       | 0.79       | 0.88     | 1.3   |        |
| 14 Living home                                      | No, I work on essential services                               | 13.73    | 12.39    | 13.79  | 7.24                                                         | 16.36      | 17.77      | 15.19    | 4.47  | <0.01  |
|                                                     | Yes                                                            | 54.13    | 57.73    | 43.67  | 62.31                                                        | 43.85      | 39.51      | 48.13    | 87.39 |        |
|                                                     | Yes, teleworking                                               | 21.11    | 27.79    | 39.08  | 27.53                                                        | 39.48      | 41.35      | 36.73    | 6.71  |        |
|                                                     | Yes, going shopping                                            | 18.9     | 13.39    | 17.17  | 10.14                                                        | 17.82      | 18.59      | 16.69    | 16.19 |        |
|                                                     | Yes, to infect others                                          | 23.89    | 17.68    | 30.3   | 24.63                                                        | 28.52      | 24.76      | 22.13    | 13.85 | <0.01  |
| 15 Risk to infect                                   | Yes, to get infected                                           | 35.04    | 30.47    | 26.26  | 27.53                                                        | 41.87      | 33.57      | 34.33    | 34.9  |        |
|                                                     | Elders                                                         | 36.23    | 34.25    | 43.33  | 23.52                                                        | 32.05      | 35.33      | 36.86    | 22.98 |        |
|                                                     | Anyone                                                         | 48.63    | 51.26    | 50.00  | 70.58                                                        | 41.27      | 41.49      | 54.17    | 69.79 | <0.01  |
|                                                     | Children                                                       | 13.32    | 12.97    | 3.33   | 5.88                                                         | 14.28      | 21.55      | 7.21     | 6.47  |        |
|                                                     | Colleagues at work                                             | 1.81     | 1.50     | 3.33   | 0.00                                                         | 2.38       | 1.61       | 1.74     | 0.74  |        |
| 16 Exposed consume substances                       | No                                                             | 55.2     | 64.77    | 41.22  | 50.00                                                        | 42.95      | 51.97      | 59.86    | 77.68 |        |
|                                                     | Yes, alcohol                                                   | 5.57     | 6.74     | 8.77   | 9.75                                                         | 8.88       | 7.23       | 5.01     | 2.47  |        |
|                                                     | Yes, food                                                      | 26.26    | 19.40    | 22.8   | 20.73                                                        | 33.04      | 27.44      | 22.72    | 13.4  | <0.01  |
|                                                     | Yes, illegal drugs                                             | 0.25     | 0.73     | 5.26   | 2.43                                                         | 1.07       | 0.28       | 0.16     | 0.09  |        |
|                                                     | Yes, drugs to calm down                                        | 4.83     | 2.44     | 8.77   | 6.09                                                         | 4.24       | 4.99       | 4.27     | 3.07  |        |
| 17 Media to get information about pandemic          | Yes, tobacco                                                   | 7.85     | 5.89     | 13.15  | 10.97                                                        | 9.79       | 8.06       | 7.95     | 3.27  |        |
|                                                     | Social media                                                   | 30.09    | 27.20    | 35.00  | 30.88                                                        | 7.49       | 5.45       | 3.41     | 1.49  |        |
|                                                     | TV                                                             | 37.48    | 35.18    | 28.33  | 31.61                                                        | 50.54      | 50.41      | 50.08    | 48.38 |        |
|                                                     | Radio                                                          | 14.94    | 16.67    | 10.00  | 12.5                                                         | 13.74      | 20.14      | 22.9     | 25.1  |        |
|                                                     | Newspapers                                                     | 12.83    | 15.18    | 15.00  | 11.76                                                        | 19.17      | 16.7       | 17.07    | 20.19 |        |
| 18 Other                                            | Other                                                          | 4.63     | 5.74     | 11.66  | 13.23                                                        | 9.03       | 7.27       | 6.52     | 4.82  |        |
|                                                     | If's ok                                                        | 19.28    | 18.40    | 6.33   | 13.18                                                        | 9.76       | 17.8       | 28.13    | 26.74 |        |
|                                                     | The Government explains too much                               | 2.65     | 4.55     | 0.00   | 2.19                                                         | 1.44       | 2.28       | 3.88     | 6.66  |        |
|                                                     | The Government explains too less                               | 9.06     | 8.60     | 14.08  | 9.89                                                         | 8.99       | 8.56       | 9.7      | 8.53  | <0.01  |
|                                                     | Media explain too much                                         | 12.49    | 13.43    | 11.97  | 8.79                                                         | 9.69       | 10.46      | 14.32    | 19.21 |        |
| 19 Impact of the pandemic on people (subjective)    | Media explain too less                                         | 2.8      | 3.11     | 5.63   | 8.79                                                         | 2.68       | 2.69       | 3.53     | 2.96  |        |
|                                                     | Too negative                                                   | 20.47    | 21.90    | 25.35  | 18.68                                                        | 41.88      | 26.09      | 0.24     | 0.11  |        |
|                                                     | Poorly adjusted to the reality                                 | 27.34    | 25.60    | 30.98  | 29.67                                                        | 21.13      | 25.61      | 33.57    | 31.12 |        |
|                                                     | I do not think anything about it                               | 5.87     | 4.36     | 5.63   | 8.79                                                         | 4.38       | 6.47       | 6.6      | 4.64  |        |
|                                                     | No                                                             | 18.11    | 29.88    | 23.07  | 23.25                                                        | 17.23      | 19.43      | 21.13    | 28.05 |        |
| 20 Impact with someone infected by SARS-CoV-2       | Yes, my personality                                            | 5.18     | 3.71     | 9.4    | 5.81                                                         | 8.17       | 8.55       | 3.59     | 2.02  |        |
|                                                     | Yes, my vision of the society/ ho                              | 51.74    | 47.05    | 43.58  | 50.00                                                        | 50.98      | 51.86      | 52.4     | 46.36 | <0.01  |
|                                                     | Yes, my life                                                   | 24.95    | 19.34    | 23.93  | 20.93                                                        | 23.6       | 23.14      | 23.17    | 23.56 |        |
|                                                     | I do not know                                                  | 79.01    | 82.93    | 70.32  | 82.6                                                         | 75.00      | 76.77      | 79.62    | 88.72 |        |
|                                                     | Yes, with a probable non-confirmed case                        | 10.16    | 9.01     | 16.48  | 5.79                                                         | 13.05      | 11.61      | 9.79     | 5.14  | <0.01  |
| 21 Yes, with a confirmed case                       | No                                                             | 22.92    | 35.72    | 11.29  | 37.75                                                        | 15.55      | 20.98      | 28.09    | 46.06 |        |
|                                                     | Headache                                                       | 17.06    | 13.02    | 13.7   | 8.16                                                         | 17.59      | 18.01      | 16.29    | 10.81 |        |
|                                                     | Sore throat                                                    | 10.51    | 7.95     | 9.27   | 13.26                                                        | 10.81      | 10.59      | 9.47     | 7.96  |        |
|                                                     | Nasal congestion/running nose                                  | 9.1      | 9.37     | 10.08  | 12.24                                                        | 12.06      | 9.05       | 8.28     | 6.2   |        |
|                                                     | Extreme fatigue/bredness                                       | 7.47     | 5.30     | 10.48  | 4.08                                                         | 7.92       | 7.57       | 6.76     | 4.77  |        |
| 22 Persistent cough (for one week or muscle pain)   | Persistent cough (for one week or muscle pain)                 | 6.96     | 6.50     | 6.85   | 7.14                                                         | 6.71       | 6.94       | 6.92     | 6.81  |        |
|                                                     | Diarrhea                                                       | 6.55     | 5.15     | 8.87   | 4.08                                                         | 6.54       | 6.78       | 6.43     | 4.67  |        |
|                                                     | Dizziness                                                      | 5.37     | 5.32     | 8.46   | 6.12                                                         | 6.74       | 5.63       | 5.06     | 3.36  |        |
|                                                     | Shortness of breath                                            | 3.14     | 1.95     | 8.06   | 2.04                                                         | 3.92       | 2.97       | 2.53     | 1.54  |        |
|                                                     | Chest pain                                                     | 1.96     | 1.74     | 1.2    | 2.04                                                         | 2.88       | 2.48       | 1.88     | 1.19  |        |
| 23 Loss of smell, small blindness                   | Loss of smell, small blindness                                 | 1.93     | 1.66     | 2.41   | 1.02                                                         | 2.15       | 2.05       | 1.76     | 1.31  |        |
|                                                     | Persistent fever (for one week or more)                        | 1.58     | 1.79     | 2.41   |                                                              |            |            |          |       |        |

STROBE Statement—Checklist of items that should be included in reports of *cross-sectional studies*

|                              | Item No | Recommendation                                                                                                                                                                                               | Page No |
|------------------------------|---------|--------------------------------------------------------------------------------------------------------------------------------------------------------------------------------------------------------------|---------|
| <b>Title and abstract</b>    | 1       | (a) Indicate the study's design with a commonly used term in the title or the abstract                                                                                                                       | 1       |
|                              |         | (b) Provide in the abstract an informative and balanced summary of what was done and what was found                                                                                                          | 2       |
| <b>Introduction</b>          |         |                                                                                                                                                                                                              |         |
| Background/rationale         | 2       | Explain the scientific background and rationale for the investigation being reported                                                                                                                         | 4-5     |
| Objectives                   | 3       | State specific objectives, including any prespecified hypotheses                                                                                                                                             | 5       |
| <b>Methods</b>               |         |                                                                                                                                                                                                              |         |
| Study design                 | 4       | Present key elements of study design early in the paper                                                                                                                                                      | 5-6     |
| Setting                      | 5       | Describe the setting, locations, and relevant dates, including periods of recruitment, exposure, follow-up, and data collection                                                                              | 5-6     |
| Participants                 | 6       | (a) Give the eligibility criteria, and the sources and methods of selection of participants                                                                                                                  | 5-6     |
| Variables                    | 7       | Clearly define all outcomes, exposures, predictors, potential confounders, and effect modifiers. Give diagnostic criteria, if applicable                                                                     | 5-6     |
| Data sources/<br>measurement | 8*      | For each variable of interest, give sources of data and details of methods of assessment (measurement). Describe comparability of assessment methods if there is more than one group                         | 5-7     |
| Bias                         | 9       | Describe any efforts to address potential sources of bias                                                                                                                                                    | 6-7     |
| Study size                   | 10      | Explain how the study size was arrived at                                                                                                                                                                    | 7       |
| Quantitative variables       | 11      | Explain how quantitative variables were handled in the analyses. If applicable, describe which groupings were chosen and why                                                                                 | N/A     |
| Statistical methods          | 12      | (a) Describe all statistical methods, including those used to control for confounding                                                                                                                        | 5-7     |
|                              |         | (b) Describe any methods used to examine subgroups and interactions                                                                                                                                          | 6-7     |
|                              |         | (c) Explain how missing data were addressed                                                                                                                                                                  | 6-7     |
|                              |         | (d) If applicable, describe analytical methods taking account of sampling strategy                                                                                                                           | 6-7     |
|                              |         | (e) Describe any sensitivity analyses                                                                                                                                                                        | N/A     |
| <b>Results</b>               |         |                                                                                                                                                                                                              |         |
| Participants                 | 13*     | (a) Report numbers of individuals at each stage of study—eg numbers potentially eligible, examined for eligibility, confirmed eligible, included in the study, completing follow-up, and analysed            | 7, 18   |
|                              |         | (b) Give reasons for non-participation at each stage                                                                                                                                                         | N/A     |
|                              |         | (c) Consider use of a flow diagram                                                                                                                                                                           | -       |
| Descriptive data             | 14*     | (a) Give characteristics of study participants (eg demographic, clinical, social) and information on exposures and potential confounders                                                                     | 7-8     |
|                              |         | (b) Indicate number of participants with missing data for each variable of interest                                                                                                                          | 18      |
| Outcome data                 | 15*     | Report numbers of outcome events or summary measures                                                                                                                                                         | 8-10    |
| Main results                 | 16      | (a) Give unadjusted estimates and, if applicable, confounder-adjusted estimates and their precision (eg, 95% confidence interval). Make clear which confounders were adjusted for and why they were included | 8-10    |



|                          |    |                                                                                                                                                                            |       |
|--------------------------|----|----------------------------------------------------------------------------------------------------------------------------------------------------------------------------|-------|
|                          |    | (b) Report category boundaries when continuous variables were categorized                                                                                                  |       |
|                          |    | (c) If relevant, consider translating estimates of relative risk into absolute risk for a meaningful time period                                                           |       |
| Other analyses           | 17 | Report other analyses done—eg analyses of subgroups and interactions, and sensitivity analyses                                                                             |       |
| <b>Discussion</b>        |    |                                                                                                                                                                            |       |
| Key results              | 18 | Summarise key results with reference to study objectives                                                                                                                   | 17    |
| Limitations              | 19 | Discuss limitations of the study, taking into account sources of potential bias or imprecision. Discuss both direction and magnitude of any potential bias                 | 11    |
| Interpretation           | 20 | Give a cautious overall interpretation of results considering objectives, limitations, multiplicity of analyses, results from similar studies, and other relevant evidence | 11-17 |
| Generalisability         | 21 | Discuss the generalisability (external validity) of the study results                                                                                                      | 11-17 |
| <b>Other information</b> |    |                                                                                                                                                                            |       |
| Funding                  | 22 | Give the source of funding and the role of the funders for the present study and, if applicable, for the original study on which the present article is based              | 19    |

\*Give information separately for exposed and unexposed groups.

**Note:** An Explanation and Elaboration article discusses each checklist item and gives methodological background and published examples of transparent reporting. The STROBE checklist is best used in conjunction with this article (freely available on the Web sites of PLoS Medicine at <http://www.plosmedicine.org/>, Annals of Internal Medicine at <http://www.annals.org/>, and Epidemiology at <http://www.epidem.com/>). Information on the STROBE Initiative is available at [www.strobe-statement.org](http://www.strobe-statement.org).

# BMJ Open

## Identification of most vulnerable populations at psychosocial sphere: a cross-sectional study conducted in Catalonia during the strict confinement in the context of Covid-19 pandemic.

|                                 |                                                                                                                                                                                                                                                                                                                                                                                                                                                                                                                                                                                                                                                                                                                                                                                                                                                                                                                                                                                                                                                                                                                                                                                                                                                                                                                                                                                                                                                                                                               |
|---------------------------------|---------------------------------------------------------------------------------------------------------------------------------------------------------------------------------------------------------------------------------------------------------------------------------------------------------------------------------------------------------------------------------------------------------------------------------------------------------------------------------------------------------------------------------------------------------------------------------------------------------------------------------------------------------------------------------------------------------------------------------------------------------------------------------------------------------------------------------------------------------------------------------------------------------------------------------------------------------------------------------------------------------------------------------------------------------------------------------------------------------------------------------------------------------------------------------------------------------------------------------------------------------------------------------------------------------------------------------------------------------------------------------------------------------------------------------------------------------------------------------------------------------------|
| Journal:                        | <i>BMJ Open</i>                                                                                                                                                                                                                                                                                                                                                                                                                                                                                                                                                                                                                                                                                                                                                                                                                                                                                                                                                                                                                                                                                                                                                                                                                                                                                                                                                                                                                                                                                               |
| Manuscript ID                   | bmjopen-2021-052140.R1                                                                                                                                                                                                                                                                                                                                                                                                                                                                                                                                                                                                                                                                                                                                                                                                                                                                                                                                                                                                                                                                                                                                                                                                                                                                                                                                                                                                                                                                                        |
| Article Type:                   | Original research                                                                                                                                                                                                                                                                                                                                                                                                                                                                                                                                                                                                                                                                                                                                                                                                                                                                                                                                                                                                                                                                                                                                                                                                                                                                                                                                                                                                                                                                                             |
| Date Submitted by the Author:   | 14-Jul-2021                                                                                                                                                                                                                                                                                                                                                                                                                                                                                                                                                                                                                                                                                                                                                                                                                                                                                                                                                                                                                                                                                                                                                                                                                                                                                                                                                                                                                                                                                                   |
| Complete List of Authors:       | Farrés, Judith; Anaxomics Biotech SL Systems Biology Solutions Ruiz, Jose Luis; Anaxomics Biotech SL Systems Biology Solutions Mas, Jose Manuel; Anaxomics Biotech SL Systems Biology Solutions Arias, Lilibeth; Fundació Institut d'Investigació en Ciències de la Salut Germans Trias i Pujol, Experimental Tuberculosis Unit; CIBERES Sarrias, Maria-Rosa; Fundació Institut d'Investigació en Ciències de la Salut Germans Trias i Pujol, Innate Immunity Group; CIBEREHD Armengol, Carolina; Fundació Institut d'Investigació en Ciències de la Salut Germans Trias i Pujol, Childhood Liver Oncology Group; CIBEREHD Cardona, Pere-Joan; Fundació Institut d'Investigació en Ciències de la Salut Germans Trias i Pujol, Experimental Tuberculosis Unit. ; CIBERES Munoz-Moreno, Jose A; Fundació Lluita Contra la Sida, Servei de Malalties Infeccioses, Hospital Germans Trias; Universitat Oberta de Catalunya, Facultat de Psicologia i Ciències de l'Educació Vilaplana, Miriam; Parc Sanitari Sant Joan de Deu Arranz, Belen; Parc Sanitari Sant Joan de Deu, Institut de Recerca Sant Joan de Deu; CIBERSAM Usall, Judith; Parc Sanitari Sant Joan de Deu, Institut de Recerca Sant Joan de Deu Serrano-Blanco, Antoni; Parc Sanitari Sant Joan de Deu, Institut de Recerca Sant Joan de Deu; CIBERESP Vilaplana, Cristina; Fundació Institut d'Investigació en Ciències de la Salut Germans Trias i Pujol, Unitat de Tuberculosi Experimental. Universitat Autònoma de Barcelona (UAB); CIBERES |
| <b>Primary Subject Heading</b>: | Public health                                                                                                                                                                                                                                                                                                                                                                                                                                                                                                                                                                                                                                                                                                                                                                                                                                                                                                                                                                                                                                                                                                                                                                                                                                                                                                                                                                                                                                                                                                 |
| Secondary Subject Heading:      | Global health, Infectious diseases, Health policy                                                                                                                                                                                                                                                                                                                                                                                                                                                                                                                                                                                                                                                                                                                                                                                                                                                                                                                                                                                                                                                                                                                                                                                                                                                                                                                                                                                                                                                             |
| Keywords:                       | Public health < INFECTIOUS DISEASES, COVID-19, Health policy < HEALTH SERVICES ADMINISTRATION & MANAGEMENT, HEALTH SERVICES ADMINISTRATION & MANAGEMENT                                                                                                                                                                                                                                                                                                                                                                                                                                                                                                                                                                                                                                                                                                                                                                                                                                                                                                                                                                                                                                                                                                                                                                                                                                                                                                                                                       |
|                                 |                                                                                                                                                                                                                                                                                                                                                                                                                                                                                                                                                                                                                                                                                                                                                                                                                                                                                                                                                                                                                                                                                                                                                                                                                                                                                                                                                                                                                                                                                                               |

1  
2  
3  
4  
5  
6  
7  
8  
9  
10  
11  
12  
13  
14  
15  
16  
17  
18  
19  
20  
21  
22  
23  
24  
25  
26  
27  
28  
29  
30  
31  
32  
33  
34  
35  
36  
37  
38  
39  
40  
41  
42  
43  
44  
45  
46  
47  
48  
49  
50  
51  
52  
53  
54  
55  
56  
57  
58  
59  
60

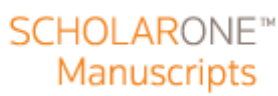



I, the Submitting Author has the right to grant and does grant on behalf of all authors of the Work (as defined in the below author licence), an exclusive licence and/or a non-exclusive licence for contributions from authors who are: i) UK Crown employees; ii) where BMJ has agreed a CC-BY licence shall apply, and/or iii) in accordance with the terms applicable for US Federal Government officers or employees acting as part of their official duties; on a worldwide, perpetual, irrevocable, royalty-free basis to BMJ Publishing Group Ltd ("BMJ") its licensees and where the relevant Journal is co-owned by BMJ to the co-owners of the Journal, to publish the Work in this journal and any other BMJ products and to exploit all rights, as set out in our [licence](#).

The Submitting Author accepts and understands that any supply made under these terms is made by BMJ to the Submitting Author unless you are acting as an employee on behalf of your employer or a postgraduate student of an affiliated institution which is paying any applicable article publishing charge ("APC") for Open Access articles. Where the Submitting Author wishes to make the Work available on an Open Access basis (and intends to pay the relevant APC), the terms of reuse of such Open Access shall be governed by a Creative Commons licence – details of these licences and which [Creative Commons](#) licence will apply to this Work are set out in our licence referred to above.

Other than as permitted in any relevant BMJ Author's Self Archiving Policies, I confirm this Work has not been accepted for publication elsewhere, is not being considered for publication elsewhere and does not duplicate material already published. I confirm all authors consent to publication of this Work and authorise the granting of this licence.

**Identification of most vulnerable populations at psycho-social sphere: a cross-sectional study conducted in Catalonia during the strict confinement in the context of Covid-19 pandemic.**

Judith Farrés<sup>1</sup>, José Luis Ruiz<sup>1</sup>, José Manuel Mas<sup>1</sup>, Lilibeth Arias<sup>2,3</sup>, Maria-Rosa Sarrias<sup>4,5</sup>, Carolina Armengol<sup>5,6</sup>, Pere-Joan Cardona<sup>2,3</sup>, José A. Muñoz-Moreno<sup>7,8</sup>, Miriam Vilaplana<sup>9</sup>, Belén Arranz<sup>9,10,11</sup>, Judith Usall<sup>9,11</sup>, Antoni Serrano-Blanco<sup>9,11,12</sup>, Cristina Vilaplana<sup>2,3,\*</sup>

1. Anaxomics Biotech SL. C/ Diputació, 237, 1r 1a, 08007 Barcelona.

2. Experimental Tuberculosis Unit (UTE). Fundació Institut Germans Trias i Pujol (IGTP). Universitat Autònoma de Barcelona (UAB). Edifici Mar. Can Ruti Campus. Ctra. de Can Ruti, camí de les Escoles, s/n, 08916 Badalona, Catalunya, Espanya.

3. Centro de Investigación Biomédica en Red de Enfermedades Respiratorias (CIBERES). Av. Monforte de Lemos, 3-5, pavelló 11, planta 0, 28029, Madrid, Espanya.

4. Innate Immunity Group. Fundació Institut Germans Trias i Pujol (IGTP). Can Ruti Campus. Edifici Muntanya. Ctra. de Can Ruti, camí de les Escoles, s/n, 08916 Badalona, Catalunya, Espanya.

5. Centro de Investigación Biomédica en Red de Enfermedades Hepáticas y Digestivas (CIBEREhD). Av. Monforte de Lemos, 3-5, pavelló 11, planta 0, 28029 Madrid, Espanya.

6. Childhood Liver Oncology Group, Germans Trias i Pujol Research Institute (IGTP),

Program of Predictive and Personalized Medicine of Cancer (PMPCC), Badalona, Spain

7. Fundació Lluita contra la SIDA (FLS) - Servei de Malalties Infeccioses, Hospital Germans Trias i Pujol, Badalona.

8. Facultat de Psicologia i Ciències de l'Educació, Universitat Oberta de Catalunya (UOC), Barcelona.

9. Parc Sanitari Sant Joan de Déu. C/Antoni Pujadas, 42, 08830 Sant Boi de Llobregat, Catalunya, Espanya.

10. Centro de Investigación Biomédica en Red de Salud Mental (CIBERSAM). Av. Monforte de Lemos, 3-5, pavelló 11, planta 0, 28029 Madrid, Espanya.

11. Institut de Recerca Sant Joan de Déu. C/ Santa Rosa, 39-57, 3a planta, 08940 Esplugues de Llobregat, Catalunya, Espanya.

12. Centro de Investigación Biomédica en Red de Epidemiología y Salud Pública (CIBERESP). Av. Monforte de Lemos, 3-5, 28029 Madrid, Espanya.

**Corresponding author\*:**

Cristina Vilaplana, MD, PhD

ORCID: <https://orcid.org/0000-0002-2808-7270>

Principal Investigator

Fundació Institut Germans Trias i Pujol (IGTP), Experimental Tuberculosis Unit (UTE), Campus Can Ruti. Ctra. de Can Ruti, Camí de les Escoles, s/n.

08916 Badalona, Catalonia, Spain

Telephone: +34 93 033 0527

[cvilaplana@igtp.cat](mailto:cvilaplana@igtp.cat)

## Abstract

2 **Objectives:** To evaluate the impact of Covid-19 on psycho-social sphere on both the  
6 general population and HCW.

4 **Design:** Cross-sectional study.

12 **Setting:** It was conducted in Catalonia, Spain during the first wave of Covid-19 outbreak  
14 and when confinement was in force.

16 **Participants:** The study population was all people >16 years old consenting to participate  
18 in the study and completing the survey. 56,656 completed survey questionnaires were  
20 obtained from the 3<sup>rd</sup> to 19<sup>th</sup> April 2020.

22 **Interventions:** a 74-question survey questionnaire was developed and shared through  
24 social media through using snowball sampling.

26 **Primary and secondary outcome measures:** descriptive statistics for the non-  
28 psychological questions and psychological impact of the outbreak as depression, anxiety,  
30 stress and PTSD questions scores.

32 **Results** showed an early and important negative impact on family finances, fear of  
34 working with Covid-19 patients and ethical issues related to Covid-19 care among  
36 healthcare workers (HCW). 7 target groups at higher risk of impaired mental health and  
38 susceptible to benefiting from an intervention were identified: women, under 42 years of  
40 age, people with care burden, socio-economically deprived groups, people with unskilled  
42 or unqualified jobs, Covid-19 patients, and HCW working with Covid-19 patients.

44 **Conclusions:** Active implementation of specific strategies to increase resilience and to  
46 prepare an adequate organizational response should be encouraged for the 7 groups  
48 identified as high risk and susceptible to benefit from an intervention.

50 **Study registration:** ClinicalTrials.gov identifier (NCT number) NCT04378452.

### Strengths

- The current study originated on the suggestions of citizens and aimed to identify the impacts of the Covid-19 pandemia on a wide range of dimensions of health status two weeks after starting strict confinement and while it was still in force.
- The survey was disseminated through social media, rapidly reaching a large number of people without exposing interviewers to infection and becoming one of the most extensive surveys never published. A total of 56,656 survey questionnaires were analysed, which encompasses a 0.85% of the Catalan population of >16 years old.

### Limitations

- The survey was long (74 questions), allowing to collect a high amount of data but might have generated fatigue and a high drop out.
- No validated scales were used.
- The snowball strategy through social media does not allow the population studied to be controlled and is not a representative survey of a specific population.

## 1. Introduction

On 30<sup>th</sup> March 2020, 78,797 confirmed cases of SARS-CoV-2, 6,528 deaths and 14,709 patients who had recovered were reported in Spain [1]; 16,157 cases and 1,410 deaths were recorded in Catalonia [2]. Case fatality (8%) was calculated for the registered cases, although the mortality rate was uncertain and the total number of cases were unknown. At that time, there was local transmission of SARS-CoV-2 in the community. Everyone with a compatible respiratory condition was considered likely to be a case of SARS-CoV-2 although the etiological diagnosis could not be made for all suspected cases in the context of a health emergency because of the lack of kits and the saturation of the health system [3,4].

On the other hand, the 16% of the confirmed cases in our setting by March 30<sup>th</sup> 2020 affected healthcare workers (HCW)[2]. Besides their obvious increased risk of being infected, the HCW facing the SARS-CoV-2 epidemics on the frontline (emergency rooms, ICUs, and other depts.) were put under high levels of stress and anxiety. This worsened as the tension in the Health Systems increased, requiring them to face important ethical dilemmas including triage of patients.

Other major outbreaks of infectious diseases such as Ebola have demonstrated that there is an important impact at individual but also at community level, as health services, social systems and economic productivity are severely affected [5]. An important impact on mental health and emotional burden by SARS-CoV-2 epidemics and mass quarantines which have been implemented in other epidemics context has been reported [6–9].

However, a certain level of anxiety is necessary for the adoption of recommended precautionary measures against infection outbreaks [10], and for the successful implementation of public health interventions. Additionally, the SARS epidemic proved



1  
2  
3 that frontline HCW not only suffered from chronic stress at the time, but that this lasted  
4  
5  
6 2 for at least one year after the epidemic wave was over [11].

7  
8 Following the suggestions of members of the public society and HCW that claimed that  
9  
10 4 the outbreak and confinement were impacting on people's lives and the need of assessing  
11  
12 the nature of this effect, we designed the present study in a week with the hypothesis that  
13  
14  
15 6 the impact of the pandemic was important at several health dimensions.

## 17 **2. Objectives**

18  
19 8 To evaluate the impact of Covid-19 on psycho-social sphere on both the general  
20  
21 population and HCW.  
22

## 23 24 10 **3. M&M**

### 25 26 26 **3.1. Design and setting**

27  
28 12 This is a cross-sectional study, conducted in Catalonia, Spain in April 2020, during the  
29  
30 first wave of Covid-19 outbreak, after two weeks of starting the strict confinement and  
31  
32  
33 14 while still in force.

### 34 35 36 16 **3.2. Participants**

37  
38  
39  
40 All people >16 years old willing to participate in the study. Before starting the survey  
41  
42 18 participants were informed about the aim of the study, the compliance with their rights  
43  
44 and the existence of the IRB approval (PI-20-114, from Ethics Committee of the Germans  
45  
46  
47 20 Trias i Pujol Hospital), and gave consent by starting the questionnaire. They were also  
48  
49 informed about their right of access, rectification, limitation and erasure of their personal  
50  
51  
52 22 data and to withdraw consent, as well as how to exercise any of these rights.

### 53 54 55 55 **3.3. Outcome measures**

56  
57 24 Descriptive statistics for the non-psychological questions and psychological impact of  
58  
59 the outbreak as depression, anxiety, stress and Post Traumatic Stress Disorder (PTSD)  
60

1  
2  
3 questions scores. Data on demography, socio-economic sphere, habits and health status  
4  
5  
6 2 related to Covid-19 during confinement and mental health dimension (related to  
7  
8 depression, anxiety, stress and PTSD symptoms) were collected through an anonymous  
9  
10  
11 4 online survey including 74 questions (Supplementary Table 1), created with the  
12  
13 Typeform software (Typeform SL, Barcelona, Spain) complying with the European  
14  
15 6 General Data Protection Regulation (GDPR). The survey was shared in 5 different  
16  
17 languages (Catalan, Spanish, English, Italian, and French) through social media  
18  
19 8 (WhatsApp, Telegram channels, institutional websites) using snowball sampling. In order  
20  
21 to reach HCW we used HCW whatsapp groups and telegram channels, as well as hospital  
22  
23  
24 10 institutional websites.

25  
26 The completion of the whole questionnaire took approximately 10 minutes. Initially we  
27  
28 12 estimated an n of 2,000 completed questionnaires within 6 months (April-September  
29  
30 2020) would allow to extract valid results. As we received a high number of completed  
31  
32  
33  
34 14 questionnaires in few weeks we analysed all completed questionnaires obtained from the  
35  
36 3<sup>rd</sup> to 19<sup>th</sup> April 2020.

37  
38  
39 16 The data were downloaded as a spreadsheet file (Excel Microsoft Office) after collection  
40  
41 and deleted from the Typeform software.

### 42 43 18 **3.4. Analysis and Statistics**

44  
45 All data was processed anonymously. Answers of participants that didn't reach the end  
46  
47 20 of the questionnaire were considered not completed and a drop out. Only finished  
48  
49 questionnaires were saved and taken into account for the analysis. Individuals reaching  
50  
51 the questionnaire's end could leave questions unanswered. For individual questions only  
52  
53 the answers for that variable were considered. The questions were grouped into indexes  
54  
55  
56 24 (socioeconomic precariousness index, depression index, anxiety index, stress index, or

1  
2  
3 PTSD) following the calculation detailed in Table S1. When computing any score out of  
4  
5  
6 2 several questions, the score was only computed if all answers for the score were present.  
7  
8 Since there were no specific criteria for age stratification or the population density that  
9  
10 4 was significant for all questions, it was decided to divide these categories in the cohort  
11  
12 into groups containing a similar sample size, resulting in the following age groups <42,  
13  
14 6 42-52, 52-61, >61. Taking into account the volume of responses obtained, age ranges  
15  
16 were determined statistically so that they are homogeneous in terms of number of surveys  
17  
18 completed by group. The scores of the socio-economic precariousness index and  
19  
20 population density (inhabitants/km<sup>2</sup>) of the municipality where the respondents lived by  
21  
22 the respondents were also segmented into 4 groups each, following the same strategy.  
23  
24 10 The 4 score ranges of the 0-19 scale of socio-economic precariousness established  
25  
26 resulted in: low precariousness  $\leq 7$  points, mid-low = 7-8.5, mid-high = 8.5-10 and high >10  
27  
28 12 points.  
29  
30  
31  
32  
33 14 All results were obtained taking into account the fact that the respondents were part of  
34  
35 the totality of the cohort of respondents. Responses were also analyzed in total by  
36  
37 16 category and broken down into percentages according to conditional distributions taking  
38  
39 into account; on the one hand the gender of the respondents, and on the other their age  
40  
41  
42 18 group.  
43  
44 We took the non-binary gender and those who preferred not to say which gender they  
45  
46 20 identify as into account when analyzing the results, as this enriches the conclusions.  
47  
48 However, statistical analysis, often does not take into account the minimum volumes of  
49  
50  
51 22 responses and therefore only the groups of women and men were compared.  
52  
53 Response percentages were calculated based on the number of respondents for each  
54  
55 24 answer out of the total number of responses to each question. To assess whether the  
56  
57 categorical variables were significantly related or not, we applied the Chi-Square test  
58  
59  
60

1  
2  
3 independently in the observed counts. We conducted a bivariate analysis between scores  
4  
5 and sociodemographic variables. Differences in score distribution between different  
6  
7 groups were assessed by comparing probability distributions using a two-band Wilcoxon-  
8  
9 signed rank test and collecting the p-value using Matlab's 'signrank' function [12,13].  
10  
11  
12 All tests were applied bilaterally using a significance of 5% ( $p < 0.05$ ).  
13

## 14 **4. Results**

### 15 **4.1. Characteristics of the cohort**

16  
17  
18 We analyzed 56,656 questionnaires. The characteristics of the cohort are described in  
19  
20 Table 1. Differences between categories by gender and age are described in  
21  
22 Supplementary Table 2. The majority of respondents were females (70.4%), and from  
23  
24 and from Catalonia (95.63%, from which 27.7% from Barcelona city), which  
25  
26 encompasses a 0.85% of the Catalan population of >16 years old [2,14].  
27  
28  
29

30 Those living most precariously were under 42 years old, with 18.43% sharing an  
31  
32 apartment/house. ( $p < 0.01$ ). Most respondents had a degree (42.62%), and a qualified job  
33  
34 (36.13%). 9% of total respondents worked in the healthcare sector. Most unemployed  
35  
36 people were in the younger age range (7.6%) and in the non-binary/those who preferred  
37  
38 not to say groups (approximately 12% each).  
39

40  
41  
42 Up to 60% of the total declared that they were taking care of someone: 24.81% caring for  
43  
44 children of <16 years and 15.11% caring for parents. Women were caregivers more  
45  
46 frequently than men ( $p < 0.01$ ). The burden of care was also higher for women and people  
47  
48 of 42-61 years old ( $p < 0.01$ ) and concerning high for 4.79% of total respondents.  
49

### 50 **4.2. Impact of the pandemic on the General population**

51  
52 The impact on general population according to the responses obtained to the questionnaire  
53  
54 is described in Table 2. Categories of responses by gender and group are described in  
55  
56 Supplementary Table 2. 85.32% of the cohort declared they were remaining at home.  
57  
58  
59  
60

1  
2  
3 Those working in essential services were mostly women or of non-binary gender, and the  
4  
5 2 percentage of women was also higher amongst those who were obliged to go to work on-  
6  
7 site ( $p<0.01$ ).  
8  
9

10 4 Only 2 weeks after starting the lock-down, 25% of the cohort had already lost their job  
11  
12 or work. People under 52, as opposed to people over 52, and men, as opposed to women,  
13  
14 6 were the most affected ( $p<0.01$ ). 20.67% of the respondents declared that they had no  
15  
16 savings at all (Table 1). After the start of measures announced by the authorities to cope  
17  
18 with the pandemic, 82.75% of respondents declared that they were being careful or had  
19  
20 8 decreased their expenses. Up to 8.78% of respondents declared that they had used social  
21  
22 services help or that would need to use it soon. Those under 52 and people identifying as  
23  
24 10 non-binary gender or preferring not to say were the most affected ( $p<0.01$  and  $p<0.05$ ,  
25  
26 respectively). Those under 42 years, followed by people over 61 and people identifying  
27  
28 12 as non-binary gender were the ones who showed higher precariousness index values  
29  
30 as non-binary gender were the ones who showed higher precariousness index values  
31  
32 14 ( $p<0.01$ ).  
33  
34

35 The 19.84% of respondents declared that they had had contact with someone infected by  
36  
37 16 SARS-CoV-2, half of them with a confirmed or probable case and this was more frequent  
38  
39 for women under 52 ( $p<0.01$ ). 35.75% declared that during the previous 14 days they had  
40  
41 18 used at least one existing healthcare resource or one put in place by the authorities in the  
42  
43 context of the pandemic, and 64.25%, had used none. 73.82% declared to have had one  
44  
45 20 or more symptoms compatible with Covid-19. The most frequent symptoms were  
46  
47 headache (16.01%), sore throat and nasal congestion (9.85% and 9.17% respectively).  
48  
49 22 Only 1.76% of people with one symptom or more had received a PCR test and only 1.81%  
50  
51 of those declaring three symptoms or more. Women and under 42 said that they felt worse  
52  
53 24 at the moment they answered the survey than people in other groups ( $p<0.01$ ).  
54  
55  
56  
57  
58  
59  
60

1  
2  
3 The 42.05% of respondents said they had increased their consumption habits: in most  
4 cases of food. Women under 42 showed the largest increase in consumption, except for  
5  
6 2 illegal drugs, compared with other groups ( $p<0.01$ ).

7  
8  
9  
10 4 Most people said TV was their source of information on the pandemic (36.77%), followed  
11 by social media (29.23%). 30% of people only used one source, 37.84% 2 sources and  
12  
13 6 23.05% used 3. There was no difference across gender or age groups. 26.82% declared  
14 that the information given did not accurately reflect reality (more frequent in women and  
15  
16 8 people over 52 ( $p<0.01$ ), and another 20.92% said that it was too negative or too  
17  
18 21 sensationalist (more frequent in men and people under 42 ( $p<0.01$ )). 73.13% declared that  
19  
20 10 they were afraid or worried, these including more women, but a lower percentage of  
21  
22 26 people over 61 ( $p<0.01$ ).

23  
24  
25  
26 12 The 78.56% of the cohort declared that the pandemic had changed them, most of them  
27  
28 (50,41%) in the way that they see society/how we used to live. Those most affected were  
29  
30 14 women (more than men) and those under 42 vs the  $>61$  ( $p<0.01$  in both cases).

### 35 4.3. Impact of pandemic on HCW

36  
37 16 A total of 5,104 people (9.05% of the total) identified themselves as workers in the  
38 healthcare sector, most of them women. While the proportion women/men in the total  
39  
40 18 cohort is 70/30 in this subgroup the proportion is 85/15. The impact on this population is  
41  
42 44 detailed in Table 3. 41.65% of healthcare personnel declared that they had worked  
43  
44 20 directly with Covid-19 patients, 32% of them while on duty. The majority of HCW said  
45  
46 48 that they were afraid to work with Covid-19 patients (75.87%). As it was a multiple-  
47  
48 50 choice question, we know that around the 42.90% were afraid of transmitting the infection  
49  
50 52 to their relatives/friends, 17.07% feared getting infected or transmitting it to other  
51  
52 54 patients, and 4.28% were afraid of dying. Surprisingly, fear of dying decreased with age.  
53  
54  
55  
56  
57  
58  
59  
60

1  
2  
3 In all cases it was higher percentages of younger HCW who said they were afraid  
4  
5 2 (p<0.01).  
6

7  
8 More than 6 percent of HCW (6.27%) were worried of taking medical decisions that  
9  
10 4 represented an ethical problem for them. In fact, nearly 18.60% of them said that they had  
11  
12 ethical problems/dilemmas/issues while working. Of these, the younger the respondents,  
13  
14 6 the higher the percentage, especially with the patient triage and obligatory protocols  
15  
16 (p<0.01). As many as 437 of 5,104 HCW decided to explain to us which ethical problems  
17  
18 8 they had had. We have grouped the problems and issues that the professionals listed, and  
19  
20 the results are found in Table 3.  
21  
22

#### 23 24 10 **4.4. Impact of the pandemic on mental health status**

25  
26 Table 4 summarizes the conditions found statistically significantly associated (p<0.05)  
27  
28 12 with the mental health symptoms evaluated. According to this table, we have identified 7  
29  
30 target groups susceptible to benefitting from an intervention, and which should be taken  
31  
32 into account when designing new contention measures to cope with the pandemic: 1)  
33  
34 14 women; 2) people under 42; 3) caregivers ; 4) people working in essential services or  
35  
36 non-qualified jobs; 5) people with a higher precariousness index; 6) Covid-19 patients  
37  
38 16 and 7) healthcare personnel, especially those working with Covid-19 patients.  
39  
40

#### 41 42 18 **5. Discussion**

43  
44 Researchers have already sounded the alarm about how the Covid-19 pandemic may  
45  
46 20 affect the mental health of the general population, and more specifically patients with  
47  
48 previous physical or mental conditions (including previous mental disorders) [15,16] and  
49  
50 people at risk due to their socio-economic conditions. The current study originated on  
51  
52 22 the suggestions of citizens and aimed to identify the impacts of the Covid-19 pandemia  
53  
54 on a wide range of dimensions of health status in Catalonia while confinement was in  
55  
56 24 force. It is one of the most extensive surveys never published with a total of 56,656  
57  
58  
59  
60

1  
2  
3 questionnaires analysed, and yet it has limitations that must be considered in interpreting  
4  
5 2 the data. Even if our survey has the value to provide the information about how people of  
6  
7 different range of age and specifically woman and healthcare workers has faced the  
8  
9 pandemic at several spheres, it was not designed to be representative for a specific  
10  
11 4 population. No validated scales were used. However, as the survey included 41 questions  
12  
13 related to depression, anxiety, stress and PTSD symptoms we could explore the impact  
14  
15 6 on mental health dimension. The survey was long, which might have generated fatigue  
16  
17 and a high drop out, even if this allowed to collect a high amount of data; and it was  
18  
19 8 shared through social media, thus the sample of population studied could not be  
20  
21 controlled. However, even if not ensuring representability, the snowball was a successful  
22  
23 10 strategy to rapidly reach a large number of people without exposing interviewers to  
24  
25 infection. Another limitation is that the criteria used to establish ranges for some of the  
26  
27 12 variables were statistical, in order to obtain balanced groups in terms of number of  
28  
29 responses. This provides rigor but can be confusing because this segmentation is unusual  
30  
31 and can lead to a certain bias.  
32  
33  
34  
35  
36

37 16 As for the impact on the socioeconomic sphere, the highest level of precariousness, which  
38  
39 according to what the results seem to reflect occurs in those under 42 years of age, is  
40  
41 18 striking. Of particular concern is the fact that 25% of the people had decreased their  
42  
43 workload due to the epidemic situation, basically men, who had lost more jobs or  
44  
45 assignments previously contracted or hired, and those under 52 years old, who had been  
46  
47 20 dismissed or submitted to a temporary labour force adjustment. In addition, a quarter of  
48  
49 respondents had no savings to deal with contingencies, and up to 8.78% stated that they  
50  
51 22 had applied for social benefits or that they would do so soon. We found socioeconomic  
52  
53 precariousness to be one of the factors associated with higher scores on mental health  
54  
55  
56  
57  
58  
59  
60



1  
2  
3 indices, something worrying given that the incidence of the epidemic was also more  
4  
5 2 pronounced in the poorest neighborhoods, at least in Barcelona [17].

6  
7 According to the literature, approximately 20% of the population affected seems  
8  
9  
10 4 consistent [7,18,19], even if in some cases higher percentages have been found [20,21].

11  
12 We identified up to 7 target groups at higher risk of impaired mental health status and  
13  
14 6 susceptible to benefitting from an intervention. Worse symptoms scoring was associated  
15  
16 with the presence of symptoms compatible with Covid-19 or having used all the  
17  
18 8 healthcare resources put in place. However, as a real intervention based on these  
19  
20 assumptions would be very costly and logistically difficult, thus confirmed Covid-19  
21  
22 10 patients might be a better target group for an intervention instead.

23  
24  
25 Being female, young, and having unstable work or income have been shown to be  
26  
27 12 significant correlators of psychological negative impact [20–23]. Women are especially  
28  
29 vulnerable as they bear the heavier burden of childcare and care of the elderly, suffer  
30  
31 14 gender violence and have more precarious jobs [24]. Crises exacerbate gender  
32  
33 inequalities including gender-based violence, increased care burden, inadequate access to  
34  
35 health service and others [25][26][27]. Moreover, women account for the majority of  
36  
37 16 HCW around the world, and those younger or with childcare burden suffered  
38  
39 psychological distress [28,29]. In our setting it was mostly women who were responsible  
40  
41 18 for caring for others, and caregiver adults with higher perception of the difficulty of  
42  
43 quarantine for children and the whole family suffered more psychological distress than  
44  
45 20 the other groups. The individual perception was previously associated with their stress  
46  
47 levels and a negative behavioural and emotional impact on their children, and it has been  
48  
49 22 hypothesized that some of its causes could be the impact of the situation itself both on the  
50  
51 adults and the children (indirectly [30] and directly [31]) , plus the effects of the school  
52  
53 24 closure together with the need for working from home with a lot of new inputs. Schools  
54  
55  
56  
57  
58  
59  
60

1  
2  
3 provide not only education, but also counselling and promote and imply healthy habits  
4  
5 2 that might not be continued at home [31].  
6  
7

8 On the other hand, people over 60 years old, with their frailty and an increased risk of  
9  
10 4 suffering Covid-19 if living in nursing homes or similar facilities, were the vast majority  
11  
12 of the total number of deaths all over the world [32]. The elderly are key in Mediterranean  
13  
14 6 countries, such as ours, as they take care of grandchildren when their parents go to work,  
15  
16 so to quarantine and isolate them can be very disturbing for the whole of society.  
17  
18

19 8 Moreover, Covid-19 and the consequences of isolating the elderly can be devastating, not  
20  
21 only for their mental health but also as it contributes to a greater risk of morbidity, and  
22  
23 10 this can be even worse in the more disadvantaged populations [33,34]. Even if anxiety,  
24  
25 depression and symptoms of avoidant coping style have been reported for seniors[35]  
26  
27

28 12 [36], we found that younger people coped worse than older people with the mental burden  
29  
30 due to the Covid-19 pandemic and the measures dictated to combat it. Older people have  
31  
32 14 proved that they have more resilience than younger people in other outbreaks and major  
33  
34 hazards [37], something our results also support by showing that older people were less  
35  
36 16 afraid of dying than younger ones. This could be due because elderly have a higher sense  
37  
38 of meaning of life and that for them perceiving time as finite determines their priorities  
39  
40

41  
42 18 in terms of goals and behaviours [38]. Young adults already face life changes which are  
43  
44 stressful and the pandemic has worsened this, even if one out of five young adults might  
45  
46 20 have been better off because of being removed from external pressures such as work and  
47  
48 education and/or to having more time for close relationships [39]. Several factors have  
49  
50

51 22 been pointed out for this worsening, including the perceived virus-related health risk  
52  
53 [39][40] and the decrease of physical and social activity due to lockdown and other  
54  
55 24 restriction measures decreed by Governments [40,41]. A study in France after 2 weeks of  
56  
57 confinement reported sleep problems and increased consumption of sleeping pills, with  
58  
59  
60

1  
2  
3 both more frequent in people under 35 compared to older people [42] and Shanahan et al  
4  
5 2 showed that a good group to be selected for intervention could be females, migrants and  
6  
7 young adults with higher pre-pandemic emotional distress including social exclusion  
8  
9  
10 4 [39].

11  
12 A non-negligible proportion of our respondents were HCW, who in Europe are mostly  
13  
14 6 women [43]. Besides their obvious increased risk of being infected [44], facing the  
15  
16 SARS-CoV-2 epidemics at the frontline may have put them under a lot of pressure,  
17  
18 8 increasing levels of anxiety and chronic stress (due to the overwork and suboptimal  
19  
20 working conditions), which can last to up to a year afterwards [11,45,46].  
21  
22

23  
24 10 A study carried out in a cohort of 9,138 HCW showed that 45.7% were at risk of suffering  
25  
26 from a mental disorder [47], and another, which included 5,450, showed that 8.4% had  
27  
28 12 suicidal ideation and behaviour [48]. In our study, being a HCW has been revealed as a  
29  
30 positive factor for impaired mental health, especially for those working with Covid-19  
31  
32 14 patients and afraid of infecting others, which has proved to have an impact on outcomes  
33  
34 [49].  
35  
36

37  
38 16 This becomes worse as the tension in health systems increases, as front-line professionals  
39  
40 work in a complex environment given the ethical challenges of the Covid-19, eliciting  
41  
42 18 different dimensions of ethical dilemmas related to the situation itself and the measures  
43  
44 dictated by the Government [50]. The shortage of hospital beds was an important  
45  
46 20 problem, contributing to the case fatality rate and implying a triage of patients according  
47  
48 to their increased potential to survive [51–53]. The management of end-of-life situations  
49  
50 22 was particularly worrying, as banning the support of relatives at the bedside had a very  
51  
52 disturbing impact on patients and their families, but also on HCW mental health,  
53  
54 24 workload, challenges and professional outcomes [54]. According to our results, nearly 8  
55  
56 out of 10 HCW declared that they were afraid of working with COVID patients,  
57  
58  
59  
60

1  
2  
3 especially because of infecting others. Being obliged to work with lack of appropriate or  
4  
5 2 sufficient personal protective equipment was one of the most frequent complaints of  
6  
7 HCW who shared their narratives on the ethical concerns they suffered. This low sense  
8  
9  
10 4 of security had been previously pointed out in a small HCW cohorts elsewhere  
11  
12 [55][56][57]. We found differences between women and men in terms of the fear of  
13  
14 6 transmitting the infection to others, and this could be related to women's jobs implying  
15  
16 more exposure (as is the case for nurses, that in our cohort were mostly women). Those  
17  
18 8 working in essential services also had higher psychological distress and this could be for  
19  
20 the same reason, the low sense of security, plus the fear of being at higher risk of  
21  
22 10 contracting the infection.  
23  
24

25  
26 The 6.27% declared that that their fear was of making medical decisions that represented  
27  
28 12 an ethical problem for them, and this percentage was higher in younger people. One in  
29  
30 five of the HCW declared that they had had ethical problems in line with other studies  
31  
32 [54,58]; and approximately half of these had to do with patient selection or patient triage  
33  
34 14 protocols/therapeutic indications. In our opinion, this fact should also be explored more  
35  
36 16 thoroughly and actively followed up to prevent health professionals from being put into  
37  
38 similar situations in the future.  
39  
40  
41  
42

43 18 Our data could be used to design and implement interventions to increase the resilience  
44  
45 of these identified groups, as well as to prepare an appropriate organizational response.  
46  
47 20 In this sense, some authors have published specific strategies that could be used to  
48  
49 alleviate this suffering [54,59–64]. Some of the strategies at individual and organizational  
50  
51 22 level which could be actively implemented in the identified vulnerable populations are:  
52  
53  
54  
55  
56  
57  
58  
59  
60

- 1) To spot the individuals which a) might may be more vulnerable to mental health difficulties or b) are part of the populations identified as more vulnerable within each group/team/staff members, and to deliver them an appropriate attention.
- 2) To provide education on mental hygiene, self-reflection and emotion-focused therapy using different tools (storytelling, music, meditation, etc.).
- 3) To train in building resilience and foster a culture of resilience.
- 4) To promote mental health services and make them accessible to all. To plan a structured schedule to communicate the existing resilience measures and support programs available and how to access them.
- 5) To draft and implement a systematic communication plan in order to provide timely, accurate, regular and evidence-based information on the situation and the response planned (including all scenarios). To do training and inform about the tools available to ensure its implementation if they are involved in this response. This can be applied to all levels, including companies, health departments and hospitals, public health systems and at local and national governmental level.
- 6) To provide people structured opportunities to debrief and talk after critical events, to hear about their real-time concerns, and to engage them into collaborative approaches to the decision-making and problem-solving.

## 6. Conclusion

We identified 7 populations as vulnerable and likely to benefit from and intervention in the face of potential future outbreaks or other major hazards. Our study should open the door for the adjustment of coping measures and the elaboration of strategy proposals with the full participation of institutional leaders who are in a position to adapt policy to the real needs of the people at Organizations, Governments and Public Health Services level.

## 7. Registration

The study is registered in ClinicalTrials.gov under code NCT04378452.

## 8. Contributorship statement

MRS, CA, MV and CV made substantial contributions to the conception or design of the work. JF, JLR, JMM, LA, MRS, CA and CV made substantial contributions to the acquisition and analysis of data. MRS, CA, PJC, JAMM, MV, BA, JU, ASB made substantial contributions to the interpretation of data. MRS, CA, CV drafted the manuscript and all the others authors revised it critically for important intellectual content. All authors gave final approval of the version to be published.

## 9. Acknowledgements

We want to thank to all the people that kindly shared the survey questionnaire through social media and/or completed it. We thank as well as Jérôme Nigou, Valeria Bergalli, Paolo Salieri, Chiara Bertoldini and Harvey Evans, who kindly volunteered to translate/edit the questionnaire and website information to French, Italian and English languages; and to Harvey Evans also for edition the English grammar of the text.

## 10. Data sharing statement

The article was uploaded in [medRxiv 2021.03.20.21254029](https://doi.org/10.1101/2021.03.20.21254029). The complete dataset results generated is available at:

<https://zenodo.org/badge/DOI/10.5281/zenodo.4608502.svg>.

## 11. Patient Public Involvement

The study was rapidly designed in a week following the suggestions of members of the public that contacted the authors sharing with them their experience and priorities, claiming that the pandemic was impacting on people's lives and the need of assessing the nature of this impact at several health dimensions that at that moment worried them most.

1  
2  
3 Patients and public were involved in the data collection as the survey was shared in 5  
4  
5 2 different languages through social media using snowball sampling. A report was  
6  
7 generated based on the study and its results to be disseminated to the general public  
8  
9  
10 4 through its upload in the institutional websites and shared by email to a list of people that  
11  
12 gave specific consent to be notified of the results obtained. A press release was also issued  
13  
14  
15 6 and the study and its results discussed with key community members through meetings  
16  
17 and public debates.  
18

## 19 8 20 **12. Funding**

21  
22  
23 10 This work was supported by the Spanish Government-FEDER Funds through CV  
24  
25 [CPII18/00031], and funding from the European Union's Horizon 2020 research and  
26  
27 12 innovation programme under grant agreement No 847762 through LAC contract.  
28

## 29 **13. Conflicts of Interest**

30  
31  
32 14 JF, JLR and JMM salaries are partially paid through the European Union's Horizon 2020  
33  
34 research and innovation programme under grant agreement No 847762.  
35

36  
37 16 LA received support from the European Union's Horizon 2020 research and innovation  
38  
39 programme under grant agreement No 847762 through her contract.  
40

41  
42 18 JAMM has a post-doctoral Research Contract from the Fundació Lluita contra la SIDA,  
43  
44 and has received honoraria for research/educational presentations by GILEAD Sciences  
45  
46 20 and MSD.

47  
48 MV is the president of the Suicidal Conduct Committee of PSSJD.  
49

50  
51 22 ASB has received support from the Diputació de Barcelona through contracts or grants  
52  
53 to develop seven projects on mental health planning; from the Spanish Government-  
54  
55 24 FEDER Funds through Instituto de Salud Carlos III: grant to develop a research project  
56  
57 about mental health (PI19/00111 and PI15/00519); and from the Catalan Government  
58  
59 26 through an intensification research contract by PERIS program (SLT006/17/68), 2018-  
60

2020. He has acted as member of the Advisory Board of Instituto de Salud Carlos III for the evaluation of research projects and as member of the Advisory Board of Fundación Progreso y Salud for the evaluation of research projects.

CV received support by the Spanish Government-FEDER Funds through CIBER Enfermedades Respiratorias and her contract [CPII18/00031]; by the European Union's Horizon 2020 research and innovation programme for being the local PI of the Comix study (conducted within the EpiPose project (GA 101003688); and has acted as expert member of the Covid-19 crisis committee of the IGTP.

MRS, CA, PJC, BA and JU declare no competing interests.

#### 14. References

- 1 Ministerio de Sanidad Servicios Sociales e Igualdad; Ministerio de Economía y Competitividad; Instituto de Salud Carlos III. Situación del COVID-19 en España. <https://covid19.isciii.es/>
- 2 Health Department of the Catalan Government (Institution). Comunicat del Departament de Salut, 30 de març de 2020. <https://govern.cat/salaprensa/notes-premsa/383715/comunicat-del-departament-salut>
- 3 European Centre for Disease Prevention and Control. Novel coronavirus disease 2019 ( COVID-19 ) pandemic : increased transmission in the EU / EEA and the UK – sixth update. 2020. <https://www.ecdc.europa.eu/sites/default/files/documents/RRA-sixth-update-Outbreak-of-novel-coronavirus-disease-2019-COVID-19.pdf>
- 4 CDC. Patients with COVID-19. CDC website. 2020. <https://www.cdc.gov/coronavirus/2019-ncov/hcp/disposition-hospitalized->



1  
2  
3  
4  
5  
6  
7  
8  
9  
10  
11  
12  
13  
14  
15  
16  
17  
18  
19  
20  
21  
22  
23  
24  
25  
26  
27  
28  
29  
30  
31  
32  
33  
34  
35  
36  
37  
38  
39  
40  
41  
42  
43  
44  
45  
46  
47  
48  
49  
50  
51  
52  
53  
54  
55  
56  
57  
58  
59  
60

patients.html%0D%0A%0D%0A%0D%0A (accessed 20 Mar 2020).

- 2 5 Van Bortel T, Basnayake A, Wurie F, *et al.* Psychosocial effects of an Ebola outbreak at individual, community and international levels. *Bull World Health Organ* 2016;**94**:210–4. doi:10.2471/blt.15.158543
- 4 6 Rubin GJ, Wessely S. The psychological effects of quarantining a city. *BMJ* 2020;**368**:1–2. doi:10.1136/bmj.m313
- 7 8 Wang C, Pan R, Wan X, *et al.* Immediate psychological responses and associated factors during the initial stage of the 2019 coronavirus disease (COVID-19) epidemic among the general population in China. *Int J Environ Res Public Health* 2020;**17**. doi:10.3390/ijerph17051729
- 10 8 Sim K, Huak Chan Y, Chong PN, *et al.* Psychosocial and coping responses within the community health care setting towards a national outbreak of an infectious disease. *J Psychosom Res* 2010;**68**:195–202. doi:10.1016/j.jpsychores.2009.04.004
- 14 9 Brooks SK, Webster RK, Smith LE, *et al.* The psychological impact of quarantine and how to reduce it: rapid review of the evidence. *Lancet* 2020;**395**:912–20. doi:10.1016/S0140-6736(20)30460-8
- 16 18 10 Leung GM, Lam TH, Ho LM, *et al.* The impact of community psychological responses on outbreak control for severe acute respiratory syndrome in Hong Kong. *J Epidemiol Community Health* 2003;**57**:857–63. doi:10.1136/jech.57.11.857
- 20 22 11 McAlonan GM, Lee AM, Cheung V, *et al.* Immediate and sustained psychological impact of an emerging infectious disease outbreak on health care workers. *Can J Psychiatry* 2007;**52**:241–7. doi:10.1177/070674370705200406
- 24 12 Gibbons JD, Chakraborti S. *Nonparametric Statistical Inference*. 5th ed. Boca

- 1  
2  
3 Raton: : Chapman & Hall/CRC Press, Taylor & Francis Group 2011.  
4  
5 2 13 Hollander M, Wolfe D. *Nonparametric Statistical Methods, 2nd Edition*. 1999.  
6  
7 14 INEbase / Demography and population /Population figures and Demographic  
8  
9  
10 4 Censuses /Population figures / Latest data.  
11  
12 15 Yao H, Chen JH, Xu YF. Patients with mental health disorders in the COVID-19  
13  
14 6 epidemic. *The Lancet Psychiatry* 2020;7:e21. doi:10.1016/S2215-  
15  
16 0366(20)30090-0  
17  
18 8 16 Cullen W, Gulati G, Kelly BD. Mental health in the COVID-19 pandemic. *QJM*  
19  
20 2020;113:311–2. doi:10.1093/qjmed/hcaa110  
21  
22  
23 10 17 Mari-Dell’olmo M, Gotsens M, Pasarín MI, *et al*. Socioeconomic inequalities in  
24  
25 COVID-19 in a European urban area: Two waves, two patterns. *Int J Environ Res*  
26  
27 12 *Public Health* Published Online First: 2021. doi:10.3390/ijerph18031256  
28  
29  
30 18 González-Sanguino C, Ausín B, Castellanos MÁ, *et al*. Mental health  
31  
32 14 consequences during the initial stage of the 2020 Coronavirus pandemic  
33  
34 (COVID-19) in Spain. *Brain Behav Immun* Published Online First: 2020.  
35  
36 16 doi:10.1016/j.bbi.2020.05.040  
37  
38  
39 19 Wang C, Pan R, Wan X, *et al*. A longitudinal study on the mental health of  
40  
41 18 general population during the COVID-19 epidemic in China. *Brain Behav Immun*  
42  
43 Published Online First: 2020. doi:10.1016/j.bbi.2020.04.028  
44  
45  
46 20 20 Rodríguez-Rey R, Garrido-Hernansaiz H, Collado S. Psychological Impact and  
47  
48 Associated Factors During the Initial Stage of the Coronavirus (COVID-19)  
49  
50 22 Pandemic Among the General Population in Spain. *Front Psychol* Published  
51  
52 Online First: 2020. doi:10.3389/fpsyg.2020.01540  
53  
54  
55 24 21 Jacques-Avinõ C, López-Jiménez T, Medina-Perucha L, *et al*. Gender-based  
56  
57 approach on the social impact and mental health in Spain during COVID-19  
58  
59  
60

1  
2  
3  
4  
5  
6  
7  
8  
9  
10  
11  
12  
13  
14  
15  
16  
17  
18  
19  
20  
21  
22  
23  
24  
25  
26  
27  
28  
29  
30  
31  
32  
33  
34  
35  
36  
37  
38  
39  
40  
41  
42  
43  
44  
45  
46  
47  
48  
49  
50  
51  
52  
53  
54  
55  
56  
57  
58  
59  
60

lockdown: A cross-sectional study. *BMJ Open* Published Online First: 2020.

doi:10.1136/bmjopen-2020-044617

22 Ramírez LPG, Arriaga RJM, Hernández-Gonzalez MA, *et al.* Psychological  
4 distress and signs of post-traumatic stress in response to the COVID-19 health  
emergency in a Mexican sample. *Psychol Res Behav Manag* Published Online  
6 First: 2020. doi:10.2147/PRBM.S259563

23 Cao W, Fang Z, Hou G, *et al.* The psychological impact of the COVID-19  
8 epidemic on college students in China. *Psychiatry Res* Published Online First:  
2020. doi:10.1016/j.psychres.2020.112934

10 24 Walter LA, McGregor AJ. Sex- and Gender-specific Observations and  
Implications for COVID-19. *West J Emerg Med* 2020;:507–9.  
12 doi:10.5811/westjem.2020.4.47536

25 Peterman A, Potts A, Donnell MO, *et al.* Working Paper 528 April 2020  
14 Pandemics and Violence Against Women and Children. *Cent Glob Dev* 2020;:43.

26 Davies SE, Bennett B. A gendered human rights analysis of Ebola and Zika:  
37 Locating gender in global health emergencies. *Int Aff* Published Online First:  
38 2016. doi:10.1111/1468-2346.12704

18 27 Mollona E, Aivazidou E, Barberio V, *et al.* A policy framework for tackling the  
economic and social impact of the COVID-19 crisis. 2019.  
46 doi:10.6092/unibo/amsacta/6247

28 Kisely S, Warren N, McMahon L, *et al.* Occurrence, prevention, and  
51 management of the psychological effects of emerging virus outbreaks on  
52 healthcare workers: rapid review and meta-analysis. *BMJ* 2020;369.  
54 doi:https://doi.org/10.1136/bmj.m1642

29 Davico C, Ghiggia A, Marcotulli D, *et al.* Psychological Impact of the COVID-

- 1  
2  
3 19 Pandemic on Adults and Their Children in Italy. *Front Psychiatry* 2021;**12**:1–  
4  
5 2 8. doi:10.3389/fpsyt.2021.572997  
6  
7  
8 30 Spinelli M, Lionetti F, Pastore M, *et al.* Parents' Stress and Children's  
9  
10 4 Psychological Problems in Families Facing the COVID-19 Outbreak in Italy.  
11  
12 *Front Psychol* Published Online First: 2020. doi:10.3389/fpsyg.2020.01713  
13  
14 6 31 Wang G, Zhang Y, Zhao J, *et al.* Mitigate the effects of home confinement on  
15  
16 children during the COVID-19 outbreak. *Lancet* 2020;**395**:945–7.  
17  
18 doi:10.1016/S0140-6736(20)30547-X  
19  
20 8  
21 32 Kang SJ, Jung SI. Age-Related Morbidity and Mortality among Patients with  
22  
23 COVID-19. *Infect Chemother* Published Online First: 2020.  
24 10  
25 doi:10.3947/ic.2020.52.2.154  
26  
27  
28 12 33 Armitage R, Nellums LB. COVID-19 and the consequences of isolating the  
29  
30 elderly. *Lancet Public Heal* 2020;**5**:e256. doi:10.1016/S2468-2667(20)30061-X  
31  
32  
33 14 34 Petretto DR, Pili R. Ageing and COVID-19: What is the Role for Elderly People?  
34  
35 *Geriatrics* 2020;**5**:25. doi:10.3390/geriatrics5020025  
36  
37  
38 16 35 Meng H, Xu Y, Dai J, *et al.* Analyze the psychological impact of COVID-19  
39  
40 among the elderly population in China and make corresponding suggestions.  
41  
42 18 *Psychiatry Res.* 2020. doi:10.1016/j.psychres.2020.112983  
43  
44 36 Bobes-Bascarán T, Sáiz PA, Velasco A, *et al.* Early psychological correlates  
45  
46 associated with COVID-19 in a Spanish older adult sample. *Am J Geriatr*  
47 20  
48 *Psychiatry* 2020;:1–12. doi:https://doi.org/10.1016/j.jagp.2020.09.005  
49  
50  
51 22 37 Cohen O, Geva D, Lahad M, *et al.* Community Resilience throughout the  
52  
53 Lifespan the Potential Contribution of Healthy Elders. *PLoS One* 2016;**11**:1–14.  
54  
55 24 doi:10.1371/journal.pone.0148125  
56  
57  
58 38 Fernández-Aguilar L, Ricarte J, Ros L, *et al.* Emotional differences in young and  
59  
60

1  
2  
3  
4  
5  
6  
7  
8  
9  
10  
11  
12  
13  
14  
15  
16  
17  
18  
19  
20  
21  
22  
23  
24  
25  
26  
27  
28  
29  
30  
31  
32  
33  
34  
35  
36  
37  
38  
39  
40  
41  
42  
43  
44  
45  
46  
47  
48  
49  
50  
51  
52  
53  
54  
55  
56  
57  
58  
59  
60

older adults: Films as mood induction procedure. *Front Psychol* Published

Online First: 2018. doi:10.3389/fpsyg.2018.01110

39 Shanahan L, Steinhoff A, Bechtiger L, *et al.* Emotional Distress in Young Adults

4 During the COVID-19 Pandemic: Evidence of Risk and Resilience From a

Longitudinal Cohort Study. *Psychol Med* Published Online First: 2020.

6 doi:10.1017/s003329172000241x

40 Commodari E, La Rosa VL. Adolescents in quarantine during COVID-19

8 pandemic in Italy: Perceived health risk, beliefs, psychological experiences and expectations for the future. *Front Psychol* 2020;**11**:2480.

10 doi:10.3389/FPSYG.2020.559951

41 Maugeri G, Castrogiovanni P, Battaglia G, *et al.* The impact of physical activity

12 on psychological health during Covid-19 pandemic in Italy. *Heliyon* Published

Online First: 2020. doi:10.1016/j.heliyon.2020.e04315

14 42 Beck F, Léger D, Fressard L, *et al.* Covid-19 health crisis and lockdown

associated with high level of sleep complaints and hypnotic uptake at the

16 population level. *J. Sleep Res.* 2020. doi:10.1111/jsr.13119

43 Rossi R, Socci V, Pacitti F, *et al.* Mental Health Outcomes Among Frontline and

18 Second-Line Health Care Workers During the Coronavirus Disease 2019

(COVID-19) Pandemic in Italy. *JAMA Netw open* 2020;**3**:e2010185.

20 doi:10.1001/jamanetworkopen.2020.10185

44 Xiao J, Fang M, Chen Q, *et al.* SARS, MERS and COVID-19 among healthcare

22 workers: A narrative review. *J Infect Public Health* 2020;**13**:843–8.

53 doi:10.1016/j.jiph.2020.05.019

24 45 Simione L, Gnagnarella C. Differences Between Health Workers and General

Population in Risk Perception, Behaviors, and Psychological Distress Related to

- 1  
2  
3 COVID-19 Spread in Italy. *Front Psychol* 2020;**11**.  
4  
5 2 doi:10.3389/fpsyg.2020.02166  
6  
7 46 Pappa S, Ntella V, Giannakas T, *et al*. Prevalence of depression, anxiety, and  
8  
9 insomnia among healthcare workers during the COVID-19 pandemic: A  
10 4  
11 systematic review and meta-analysis. *Brain. Behav. Immun.* 2020.  
12  
13 doi:10.1016/j.bbi.2020.05.026  
14 6  
15 47 Alonso J, Vilagut G, Mortier P, *et al*. Mental health impact of the first wave of  
16  
17 COVID-19 pandemic on Spanish healthcare workers: A large cross-sectional  
18 8  
19 survey. *Rev Psiquiatr Salud Ment* Published Online First: 2021.  
20  
21 doi:10.1016/j.rpsm.2020.12.001  
22 10  
23 48 Mortier P, Vilagut G, Ferrer M, *et al*. Thirty-day suicidal thoughts and behaviors  
24  
25 among hospital workers during the first wave of the Spain COVID-19 outbreak.  
26 12  
27 *Depress Anxiety* Published Online First: 2021. doi:10.1002/da.23129  
28  
29 49 Ramaci T, Barattucci M, Ledda C, *et al*. Social stigma during COVID-19 and its  
30  
31 impact on HCWs outcomes. *Sustain* Published Online First: 2020.  
32 14  
33 16 doi:10.3390/su12093834  
34  
35 50 Robert R, Kentish-Barnes N, Boyer A, *et al*. Ethical dilemmas due to the Covid-  
36  
37 19 pandemic. *Ann. Intensive Care.* 2020. doi:10.1186/s13613-020-00702-7  
38 18  
39 51 Zanin M, Xiao C, Liang T, *et al*. The public health response to the COVID-19  
40  
41 outbreak in mainland China: a narrative review. *J Thorac Dis* Published Online  
42 20  
43 First: 2020. doi:10.21037/jtd-20-2363  
44  
45 52 Verweij M, van de Vathorst S, Schermer M, *et al*. Ethical Advice for an Intensive  
46  
47 Care Triage Protocol in the COVID-19 Pandemic: Lessons Learned from The  
48  
49 Netherlands. *Public Health Ethics* Published Online First: 2020.  
50 24  
51  
52 doi:10.1093/phe/phaa027  
53  
54  
55  
56  
57  
58  
59  
60

- 1  
2  
3 53 Vincent JL, Creteur J. Ethical aspects of the COVID-19 crisis: How to deal with  
4  
5 2 an overwhelming shortage of acute beds. *Eur Hear journal Acute Cardiovasc*  
6  
7 *care* Published Online First: 2020. doi:10.1177/2048872620922788  
8  
9  
10 4 54 Owens IT. Supporting nurses' mental health during the pandemic. *Nursing*  
11  
12 *(Lond)* 2020;**50**:54–7. doi:10.1097/01.NURSE.0000697156.46992.b2  
13  
14 6 55 Martínez-López JÁ, Lázaro-Pérez C, Gómez-Galán J, *et al.* Psychological Impact  
15  
16 of COVID-19 Emergency on Health Professionals: Burnout Incidence at the  
17  
18 Most Critical Period in Spain. *J Clin Med* Published Online First: 2020.  
19  
20 8  
21 doi:10.3390/jcm9093029  
22  
23  
24 10 56 Nowicki GJ, Ślusarska B, Tucholska K, *et al.* The severity of traumatic stress  
25  
26 associated with covid-19 pandemic, perception of support, sense of security, and  
27  
28 12 sense of meaning in life among nurses: Research protocol and preliminary results  
29  
30 from poland. *Int J Environ Res Public Health* Published Online First: 2020.  
31  
32 doi:10.3390/ijerph17186491  
33  
34 14  
35 57 Delgado D, Quintana FW, Perez G, *et al.* Personal safety during the covid-19  
36  
37 16 pandemic: Realities and perspectives of healthcare workers in latin America. *Int*  
38  
39 *J Environ Res Public Health* Published Online First: 2020.  
40  
41 doi:10.3390/ijerph17082798  
42  
43 18  
44 58 Epstein EG, Delgado S. Understanding and addressing moral distress. *Online J*  
45  
46 20 *Issues Nurs* Published Online First: 2010. doi:10.3912/OJIN.Vol15No03Man01  
47  
48  
49 59 Tomlin J, Dalglish-Warburton B, Lamph G. Psychosocial Support for  
50  
51 22 Healthcare Workers During the COVID-19 Pandemic. *Front Psychol* Published  
52  
53 Online First: 2020. doi:10.3389/fpsyg.2020.01960  
54  
55  
56 24 60 Maves RC, Downar J, Dichter JR, *et al.* Triage of Scarce Critical Care Resources  
57  
58 in COVID-19 An Implementation Guide for Regional Allocation: An Expert  
59  
60

1  
2  
3 Panel Report of the Task Force for Mass Critical Care and the American College  
4 of Chest Physicians. *Chest*. 2020. doi:10.1016/j.chest.2020.03.063  
5  
6 2

7  
8 61 Johns Hopkins Berman Institute of Bioethics. Resources for Frontline Clinicians.  
9  
10 4 2020.

11  
12 62 Chmitorz A, Kunzler A, Helmreich I, *et al*. Intervention studies to foster  
13  
14 6 resilience – A systematic review and proposal for a resilience framework in  
15  
16 future intervention studies. *Clin Psychol Rev* 2018;**59**:78–100.  
17  
18 doi:10.1016/j.cpr.2017.11.002  
19  
20 8

21  
22 63 Norris FH, Stevens SP, Pfefferbaum B, *et al*. Community resilience as a  
23  
24 10 metaphor, theory, set of capacities, and strategy for disaster readiness. *Am J*  
25  
26 *Community Psychol* 2008;**41**:127–50. doi:10.1007/s10464-007-9156-6  
27

28  
29 12 64 Ye J. Pediatric mental and behavioral health in the period of quarantine and  
30  
31 social distancing with COVID-19. *JMIR Pediatr Parent* 2020;**3**.  
32  
33 14 doi:10.2196/19867  
34  
35  
36  
37  
38  
39

## 40 15. Tables

41  
42 18  
43  
44  
45  
46  
47  
48  
49  
50  
51  
52  
53  
54  
55  
56  
57  
58  
59  
60



**Table 1: Characteristics of the cohort.** N of cases (number of responses received per answer category) and percentage out of the total responses obtained per each question.

Please note that some of the questions were multiple choice.

|                                 | ANSWER CATEGORIES      | N CASES | TOTAL % | ANSWER CATEGORIES     | N CASES | TOTAL % |
|---------------------------------|------------------------|---------|---------|-----------------------|---------|---------|
| <b>Gender</b>                   | Female                 | 3,922   | 70.4    | No                    | 24,755  | 39.75   |
|                                 | Male                   | 16,556  | 29.22   | Yes, of people of <16 | 15,452  | 24.81   |
|                                 | Non binary             | 88      | 0.15    | Yes, of people of >16 | 7,624   | 12.24   |
|                                 | Not saying             | 69      | 0.12    | Yes, siblings         | 782     | 1.26    |
| <b>Origin</b>                   | Catalonia region       | 54,318  | 95.63   | Yes, parents          | 9,409   | 15.11   |
|                                 | Other                  | 2,480   | 4.37    | Yes, others           | 4,248   | 6.82    |
| <b>Civil status</b>             | Married                | 30,389  | 53.65   | none                  | 24,814  | 43.80   |
|                                 | Divorced               | 6,030   | 10.64   | 1                     | 14,055  | 24.81   |
|                                 | In couple              | 10,305  | 18.19   | 2                     | 15,070  | 26.60   |
|                                 | Single                 | 7,990   | 14.1    | 3                     | 2,473   | 4.36    |
|                                 | Widow                  | 1,929   | 3.4     | 4                     | 217     | 0.38    |
| <b>Housing</b>                  | Owned apartment/house  | 51,428  | 90.95   | 5                     | 20      | 0.03    |
|                                 | Shared apartment/house | 4,417   | 7.81    | >2                    | 4,379   | 7.77    |
|                                 | Rented room            | 607     | 1.07    | 2                     | 37,677  | 66.9    |
|                                 | Centre/institution     | 71      | 0.12    | 1                     | 14,256  | 25.31   |
|                                 | Homeless               | 18      | 0.03    | No                    | 11,685  | 20.67   |
| <b>Maximum Education Degree</b> | Primary Education      | 2,182   | 3.85    | Yes                   | 20,201  | 35.73   |
|                                 | Secondary Education    | 3,093   | 5.46    | Some                  | 24,637  | 43.58   |
|                                 | High School            | 17,853  | 31.53   | No                    | 33,374  | 59.01   |

|                   |                   |        |       |                          |                                                  |        |       |
|-------------------|-------------------|--------|-------|--------------------------|--------------------------------------------------|--------|-------|
|                   | Degree            | 24,130 | 42.62 |                          | Yes, one                                         | 20,141 | 35.61 |
|                   | Master            | 7,528  | 13.29 |                          | Yes, more than one                               | 3,041  | 5.37  |
|                   | PhD               | 1,829  | 3.23  |                          | No                                               | 42,899 | 75.83 |
|                   | Qualified job     | 20,449 | 36.13 | <b>Rent to pay</b>       | Yes                                              | 13,669 | 24.16 |
|                   | Non qualified job | 2,037  | 3.59  |                          | Nurse                                            | 1,567  | 30.63 |
|                   | Job in Healthcare | 5,132  | 9.06  |                          | Physician                                        | 1,110  | 21.70 |
|                   | Home/people care  | 2,731  | 4.82  |                          | Others (including working on a private pharmacy) | 659    | 12.88 |
| <b>Employment</b> | Self-employed     | 5,110  | 9.02  |                          | Technician                                       | 588    | 11.49 |
|                   | Company owner     | 2,417  | 4.27  | <b>Occupation of HCW</b> | Administrative personnel                         | 511    | 9.99  |
|                   | Unemployed        | 2,883  | 5.09  |                          | Nurse assistant                                  | 491    | 9.59  |
|                   | Other             | 15,832 | 27.97 |                          | Researcher                                       | 129    | 2.52  |
|                   |                   |        |       |                          | Caretaker                                        | 28     | 0.54  |
|                   |                   |        |       |                          | Cleaning personnel                               | 15     | 0.29  |
|                   |                   |        |       |                          | Kitchen personnel                                | 13     | 0.25  |
|                   |                   |        |       |                          | Laundry personnel                                | 4      | 0.07  |

**Table 2: Impact of the pandemic on the General population.** N of cases (number of responses received per answer category) and percentage out of the total responses obtained per each question. Please note that some of the questions were multiple choice.

\*For the number of symptoms only answers up to 4 are presented, even if the percentage given was calculated out of the total responses obtained.

| ANSWER CATEGORIES                                         |                                                                | N CASES | TOTAL % | ANSWER CATEGORIES              |                                  | N CASES | TOTAL % |
|-----------------------------------------------------------|----------------------------------------------------------------|---------|---------|--------------------------------|----------------------------------|---------|---------|
| <b>Loss of job</b>                                        | No                                                             | 42,475  | 75.12   | <b>Staying home</b>            | No, I am forced to go to work    | 228     | 0.40    |
|                                                           | Yes, the company made a labour force adjustment plan           | 103     | 0.18    |                                | No, I need to work               | 534     | 0.94    |
|                                                           | Yes, the company made a temporary labour force adjustment plan | 5,530   | 9.78    |                                | No, I work on essential services | 7,549   | 13.32   |
|                                                           | Yes, I have lost some jobs previously contracted/arranged      | 3,252   | 5.75    |                                | Yes                              | 31,272  | 55.19   |
|                                                           | Yes, I was fired                                               | 499     | 0.88    |                                | Yes, teleworking                 | 17,073  | 30.13   |
|                                                           | Yes, others                                                    | 4,687   | 8.29    |                                | No                               | 14,021  | 26.86   |
| <b>Spending less</b>                                      | Yes                                                            | 34,307  | 60.66   | <b>Afraid</b>                  | Yes, going shopping              | 9,029   | 17.30   |
|                                                           | A little                                                       | 12,493  | 22.09   |                                | Yes, to infect others            | 11,545  | 22.12   |
|                                                           | No                                                             | 9,747   | 17.23   |                                | Yes, to get infected             | 17,590  | 33.70   |
| <b>Seek for social assistance/or any other assistance</b> | No                                                             | 51,588  | 91.00   | <b>Afraid to infect</b>        | Elders                           | 4,128   | 35.76   |
|                                                           | Not yet, but will need to                                      | 2,756   | 5.00    |                                | Anyone                           | 5,689   | 49.28   |
|                                                           | Yes                                                            | 2,208   | 4.00    |                                | Children                         | 1,524   | 13.20   |
| <b>Contact with someone infected by</b>                   | I do not know                                                  | 45,860  | 80.15   | <b>Increased substance use</b> | Colleagues at work               | 201     | 1.74    |
|                                                           | yes, with a probable non-confirmed case                        | 5,627   | 9.83    |                                | No                               | 36,521  | 57.94   |

|                                                           |                                                       |        |       |                                                      |                                             |            |            |            |
|-----------------------------------------------------------|-------------------------------------------------------|--------|-------|------------------------------------------------------|---------------------------------------------|------------|------------|------------|
| <b>SARS-CoV-2</b>                                         | Yes, with a confirmed case                            | 5,730  | 10.01 | Yes, alcohol                                         | 3,736                                       | 5.92       |            |            |
|                                                           | No                                                    | 26,598 | 26.18 | Yes, food                                            | 15,292                                      | 24.26      |            |            |
|                                                           | Headache                                              | 16,268 | 16.01 | Yes, illegal drugs                                   | 257                                         | 0.40       |            |            |
|                                                           | Sore throat                                           | 10,013 | 9.85  | Yes, drugs to calm down                              | 2,617                                       | 4.15       |            |            |
|                                                           | Nasal congestion/runn ing nose                        | 9,322  | 9.17  | Yes, tobacco                                         | 4,599                                       | 7.29       |            |            |
|                                                           | Extreme fatigue/tiredness                             | 7,029  | 6.91  | <b>Media to get information about the pandemic</b>   | Social media                                | 35,080     | 29.23      |            |
|                                                           | Persistent cough (for one week or more)               | 6,957  | 6.84  |                                                      | TV                                          | 44,126     | 36.77      |            |
| <b>Presence of symptoms (since February)</b>              | Muscle pain                                           | 6,299  | 6.20  |                                                      | Radio                                       | 18,543     | 15.45      |            |
|                                                           | Diarrhea                                              | 5,453  | 5.36  |                                                      | Newspapers                                  | 16,255     | 13.54      |            |
|                                                           | Dizziness                                             | 2,897  | 2.85  |                                                      | Other                                       | 5,991      | 4.99       |            |
|                                                           | Shortness of breath                                   | 2,231  | 2.19  |                                                      | It's ok                                     | 14,193     | 18.98      |            |
|                                                           | Chest pain                                            | 1,935  | 1.90  |                                                      | The Government explains too much            | 2,417      | 3.23       |            |
|                                                           | Loss of smell, smell blindness                        | 1,894  | 1.86  |                                                      | The Government explains too less            | 6,678      | 8.93       |            |
|                                                           | Persistent fever (for one week or more)               | 1,663  | 1.63  | <b>Thoughts about the information received</b>       | Media explain too much                      | 9,556      | 12.78      |            |
|                                                           | Loss of appetite/weight                               | 1,333  | 1.31  |                                                      | Media explain too less                      | 2,177      | 2.91       |            |
|                                                           | Loss of taste                                         | 1,689  | 1.66  |                                                      | Too negative                                | 15,645     | 20.92      |            |
|                                                           | 1                                                     | 11,899 | 40.03 |                                                      | Poorly adjusted to the reality              | 4,049      | 26.82      |            |
| <b>N of symptoms*</b>                                     | 2                                                     | 7,062  | 23.76 |                                                      | I do not think anything about it            | 20,053     | 5.41       |            |
|                                                           | 3                                                     | 4,365  | 14.68 | <b>Impact of the pandemic on people (subjective)</b> | No                                          | 14,575     | 21.43      |            |
|                                                           | 4                                                     | 2,481  | 8.34  |                                                      | Yes, my personality                         | 3,252      | 4.78       |            |
| <b>How did they feel when answering the questionnaire</b> | Well                                                  | 37,599 | 66.50 |                                                      | Yes, my vision of the society/ how we lived | 34,274     | 50.41      |            |
|                                                           | Normal                                                | 12,726 | 22.50 |                                                      | Yes, my life                                | 15,889     | 23.36      |            |
|                                                           | Not at 100%                                           | 6,010  | 10.60 |                                                      | <b>Score</b>                                | <b>50%</b> | <b>90%</b> | <b>95%</b> |
|                                                           | Bad                                                   | 235    | 0.42  | <b>Scores results per percentiles</b>                | Anxiety                                     | 2          | ≥10        | ≥16        |
| <b>Use of healthcare resources put in place in</b>        | None                                                  | 38,955 | 64.25 |                                                      | Stress                                      | 8          | ≥24        | ≥28        |
|                                                           | Have used an app set up for management of COVID cases | 13,044 | 21.51 |                                                      | Depression                                  | 4          | ≥16        | ≥20        |

|                                             |                                                                         |       |       |      |    |     |     |
|---------------------------------------------|-------------------------------------------------------------------------|-------|-------|------|----|-----|-----|
| <b>the context of the COVID-19 pandemic</b> | Have called a telephone number set up for the management of COVID cases | 3,399 | 5.60  | PTSD | 17 | ≥46 | ≥54 |
|                                             | Have been to a public healthcare center (including GP)                  | 2,286 | 3.77  |      |    |     |     |
|                                             | Have been tested                                                        | 1,108 | 1.82  |      |    |     |     |
|                                             | Have been to private doctor/healthcare center                           | 973   | 1.60  |      |    |     |     |
|                                             | Have gone to the emergency room                                         | 863   | 1.42  |      |    |     |     |
| <b>For those tested, result of the test</b> | Negative                                                                | 621   | 57.76 |      |    |     |     |
|                                             | Positive                                                                | 454   | 42.23 |      |    |     |     |

2

Review only

**Table 3: Impact of the pandemic on the HCW.** N of cases (number of responses received per answer category) and percentage out of the total responses obtained per each question. Please note that some of the questions were multiple choice.

| ANSWER CATEGORIES                                    |                                                                                                                                        | N CASES | TOTAL % | ANSWER CATEGORIES                                          |                                                                                                       | N CASES | TOTAL % |
|------------------------------------------------------|----------------------------------------------------------------------------------------------------------------------------------------|---------|---------|------------------------------------------------------------|-------------------------------------------------------------------------------------------------------|---------|---------|
| <b>Having worked directly with COVID-19 patients</b> | No                                                                                                                                     | 2,939   | 58.34   | No                                                         |                                                                                                       | 2,817   | 56.29   |
|                                                      | Yes                                                                                                                                    | 2,098   | 41.65   | No, I follow protocols                                     |                                                                                                       | 1,256   | 25.09   |
| <b>Fear of working with COVID-19 patients</b>        | No                                                                                                                                     | 1,122   | 24.13   | <b>Ethical concerns</b>                                    | Yes, with selection of patients and/or protocols for selection of patients or therapeutic indications | 473     | 9.41    |
|                                                      | Yes                                                                                                                                    | 3,528   | 75.87   |                                                            | Yes, others                                                                                           | 460     | 9.19    |
|                                                      | No fear                                                                                                                                | 1,122   | 14.58   |                                                            | Having worked without sufficient protection                                                           | 112     | 25.68   |
|                                                      | Scared of transmitting the virus to other non-COVID patients                                                                           | 1,150   | 14.95   |                                                            | With patients triage or protocols for patients triage or therapeutic indication                       | 71      | 16.28   |
| <b>Fear of working with COVID-19 patients</b>        | Scared of transmitting the virus to own people (family, colleagues)                                                                    | 3,300   | 42.90   | <b>Problems faced by healthcare professionals, grouped</b> | With the protocol for case management.                                                                | 51      | 11.46   |
|                                                      | Scared of being obliged to take medical decisions representing an ethical dilemma for me (patient selection, application of protocols) | 482     | 6.26    |                                                            | With the protocol for End-of-Life management                                                          | 39      | 8.94    |
|                                                      | Scared of being infected                                                                                                               | 1,309   | 17.01   |                                                            | With institution management or orders from superiors.                                                 | 35      | 8.02    |

1  
2  
3  
4  
5  
6  
7  
8  
9  
10  
11  
12  
13  
14  
15  
16  
17  
18  
19  
20  
21  
22  
23  
24  
25  
26  
27  
28  
29  
30  
31  
32  
33  
34  
35  
36  
37  
38  
39  
40  
41  
42  
43  
44  
45  
46  
47  
48  
49  
50  
51  
52  
53  
54  
55  
56  
57  
58  
59  
60

Afraid of  
dying 329 4.27

With the disjunctive of  
having to/wanting to go  
to work at first line and  
not being able/wanting to  
do it. 30 6.88

With the prioritization of  
dispensing protective  
material (facial masks,  
EPIs) or tests. 23 5.27

With the impact of the  
outbreak and/or  
lockdown on some  
populations (chronic or  
mental health patients,  
elders, etc.) 17 3.89

Others (non-specified) 17 3.89

With problems due to the  
organizational changes. 16 3.66

With management of  
information given to  
patients/their families,  
and related problems  
(including  
confidentiality issues). 15 3.44

With colleagues attitudes 11 2.52

2

**Table 4: Conditions statistically associated to the mental-health scores results.**

| Factors:                                                                                                                          | Statistically association to: |               |              |            |                 |                 |                    |
|-----------------------------------------------------------------------------------------------------------------------------------|-------------------------------|---------------|--------------|------------|-----------------|-----------------|--------------------|
|                                                                                                                                   | Depression Index              | Anxiety Index | Stress Index | PTSD Index | Evitation Index | Intrusion Index | Hyperarousal Index |
| Risk                                                                                                                              | p                             | p             | p            | p          | p               | p               | p                  |
| Women                                                                                                                             | 0.019                         | 0.003         |              | 0.000      | 0.007           | 0.034           | 0.027              |
| <42 y.o.                                                                                                                          |                               | 0.008         |              |            |                 |                 |                    |
| Caregivers                                                                                                                        |                               | 0.002         | 0.039        | 0.006      |                 | 0.050           |                    |
| Adults with higher perception of the difficulty of quarantine for children and the whole family (score in a 10-points scale) vs 0 |                               |               |              | 0.041      |                 | 0.032           | 0.022              |
| Living in a middle-high density population town                                                                                   |                               | 0.031         |              |            |                 |                 |                    |
| Living in a shared apartment/house                                                                                                |                               | 0.006         |              |            |                 |                 |                    |
| Living in a rented room                                                                                                           |                               | 0.039         |              |            |                 |                 |                    |
| Declaring to be homeless                                                                                                          |                               |               |              | 0.044      |                 |                 |                    |
| High deprivation index (>10)                                                                                                      |                               | 0.015         |              |            |                 |                 |                    |
| Going to work because job on essential services                                                                                   |                               | 0.011         |              |            |                 |                 |                    |
| Being a healthcare worker and to be afraid of attending COVID-19 patients                                                         | 0.017                         |               |              |            | 0.023           |                 |                    |
| To have been in contact with a COVID-19 patient                                                                                   |                               | 0.006         |              | 0.038      |                 |                 |                    |
| Having had symptoms compatible with COVID-19                                                                                      | 0.021                         | 0.002         |              | 0.008      |                 |                 |                    |
| Having used all healthcare resources put in place in the context of the COVID-19 pandemic                                         |                               |               | 0.039        | 0.008      | 0.007           |                 | 0.011              |
| To be afraid (of getting infected, to infect others, to go shopping)                                                              |                               | 0.000         | 0.036        | 0.000      | 0.003           | 0.012           | 0.006              |
| To have increased the consume of at least one substance                                                                           |                               | 0.006         |              | 0.008      |                 |                 |                    |



To use 3 media to get  
information about COVID-  
19

0.033

| <b>Protection</b>       | <b>p</b> |
|-------------------------|----------|----------|----------|----------|----------|----------|----------|
| >61 y.o.                |          | 0.006    |          | 0.05     |          |          |          |
| To be married           |          | 0.007    |          |          |          |          |          |
| Being a widow           |          |          |          | 0.020    | 0.011    |          |          |
| To have a qualified job |          | 0.008    |          |          |          |          |          |
| To have a PhD           | 0.019    | 0.010    |          |          | 0.031    |          |          |
| Feeling well            |          | 0.045    |          | 0.037    |          |          |          |

2

| General demography                                                                                                                                       |                                                                                                                                                                                                                                                                                                                                                                         |
|----------------------------------------------------------------------------------------------------------------------------------------------------------|-------------------------------------------------------------------------------------------------------------------------------------------------------------------------------------------------------------------------------------------------------------------------------------------------------------------------------------------------------------------------|
| How old are you?                                                                                                                                         |                                                                                                                                                                                                                                                                                                                                                                         |
| Which gender do you identify with?                                                                                                                       | male, female, non binary, I prefer not to say                                                                                                                                                                                                                                                                                                                           |
| In which country do you live?                                                                                                                            |                                                                                                                                                                                                                                                                                                                                                                         |
| In which postal code do you live?                                                                                                                        |                                                                                                                                                                                                                                                                                                                                                                         |
| How would you define your civil status?                                                                                                                  | single, married, divorced, widow, in a couple                                                                                                                                                                                                                                                                                                                           |
| 1 Where do you live?                                                                                                                                     | my own house/apartment, shared house/apartment, in a rented room, institutionalized, I am homeless                                                                                                                                                                                                                                                                      |
| 2 What level of education do you have? (check the maximum obtained)                                                                                      | primary education, secondary education, further education, bachelor degree, masters degree, doctoral degree                                                                                                                                                                                                                                                             |
| 3 What is your job?                                                                                                                                      | skilled job, unskilled job, caring for others/home, I have a company, I am self-employed, I am a healthcare worker (or working in a healthcare setting, I am unemployed, others                                                                                                                                                                                         |
| Questions for the Scale of socio-economic precariousness                                                                                                 |                                                                                                                                                                                                                                                                                                                                                                         |
| 4 Who provides financially at home?                                                                                                                      | For index scoring, sum of all points multiplied by 2.                                                                                                                                                                                                                                                                                                                   |
| 5 Have you lost your job due to the COVID-19 outbreak?                                                                                                   | >2 of us = 0 p, 2 of us = 1 p, only me = 2p<br>no = 0 p; yes, the company made a temporary labour force adjustment plan = 1 p; yes, others = 1.5 p; yes, I was fired/the company made a labour force adjustment plan/ I have lost some jobs previously contracted/arranged = 2 p                                                                                        |
| 7 Do you have savings?                                                                                                                                   | yes = 0 p, yes, some = 1 p, no = 2 p                                                                                                                                                                                                                                                                                                                                    |
| 8 Do you have a mortgage to pay?                                                                                                                         | no = 0 p; yes, one = 1 p; yes, more than 1 = 2 p                                                                                                                                                                                                                                                                                                                        |
| 8 Do you have rent to pay?                                                                                                                               | no = 0 p, yes = 2 p                                                                                                                                                                                                                                                                                                                                                     |
| 9 Are you spending less since the COVID-19 outbreak?                                                                                                     | no = 0 p; a little = 1 p; yes = 2 p                                                                                                                                                                                                                                                                                                                                     |
| 9 Have you asked for social assistance or for any other assistance due to the COVID-19 outbreak?                                                         | no = 0 p; no, but will have to = 1 p; yes = 2 p                                                                                                                                                                                                                                                                                                                         |
| 10 Do you have to take care of somebody? (multiple choice question)                                                                                      | no = 0 p; yes (any answer: children <16 y.o., >16 y.o, parents, siblings, others) = 1 p per positive answer.                                                                                                                                                                                                                                                            |
| Habits and COVID-19-related health status during confinement                                                                                             |                                                                                                                                                                                                                                                                                                                                                                         |
| 11 If having children: In which grade do you think the confinement is being difficult for children (and therefore for the family)?                       | scale of potential answer, 0 being= not at all and 10= a lot                                                                                                                                                                                                                                                                                                            |
| 13 Are you staying at home, during this time?                                                                                                            | yes; yes, I am teleworking; no, I work in essential services; no, I need to work; no, my employer does not allow me to                                                                                                                                                                                                                                                  |
| 14 Are you scared or worried?                                                                                                                            | no; yes, of getting infected; yes, of going to the shops; yes, of infecting others; yes, that people close to me get infected                                                                                                                                                                                                                                           |
| 15 Who are you scared of infecting?                                                                                                                      | the children, my parents/close elderly people; my colleagues; anyone                                                                                                                                                                                                                                                                                                    |
| 16 Do you think you are consuming more since the outbreak began?                                                                                         | no; yes, I eat more; yes, I drink more (alcoholic drinks); yes, I smoke more; yes, I consume more illegal drugs; yes, I consume more drugs to calm myself down (sleeping pills, muscle relaxants, tranquilizers)                                                                                                                                                        |
| 17 Through which channel do you receive information about the outbreak?                                                                                  | TV; Radio; Newspaper; Social media (Whatsapp, Twitter, Telegram etc.); Other channels                                                                                                                                                                                                                                                                                   |
| 18 What do you think of the information you are receiving?                                                                                               | It's too much: I would like the Government to explain less; It's too much: I would like the media to explain less; It's too little: I would like the Government to explain more; It's too little: I would like the media to explain more; It's too negative/too sensationalist; I think it's poorly adjusted to reality; It's alright; I do not think anything about it |
| 20 Do you think this situation has changed you?                                                                                                          | no; yes, my life has changed; yes, my personality had changed; yes, the way I see society/the way we lived                                                                                                                                                                                                                                                              |
| 21 Have you been in contact with someone infected by SARS-CoV-2?                                                                                         | yes, with a confirmed case (test positive); yes, with a probable non-confirmed case (test negative or test not done); I do not know                                                                                                                                                                                                                                     |
| 22 Since February, have you had any of these symptoms?                                                                                                   | no; persistent cough (for one week or more); headache; persistent fever (for one week or more); extreme fatigue/tiredness; sore throat; muscle pain; loss of appetite/weight; loss of smell, smell blindness; loss of taste; diarrhea; dizziness; shortness of breath; chest pain; nasal congestion/running nose                                                        |
| 24 How do you feel now?                                                                                                                                  | well, normal, I do not feel at 100%, bad                                                                                                                                                                                                                                                                                                                                |
| 25 In the last 14 days, have you used any healthcare resources put in place for the COVID-19 pandemic?                                                   | have called a telephone number set up for the management of COVID cases; have gone to the emergency room; have used an app set up for management of COVID cases; have been to a public healthcare center (including GP); have been to private doctor/healthcare center; have been tested; none of the above                                                             |
| 27 If you were tested, what was the result?                                                                                                              | positive, negative                                                                                                                                                                                                                                                                                                                                                      |
| For HealthCare workers                                                                                                                                   |                                                                                                                                                                                                                                                                                                                                                                         |
| 28 What is your job?                                                                                                                                     | physician, nurse, nurse assistant, technician, caretaker, researcher, kitchen personnel, cleaning personnel, administrative personnel, others                                                                                                                                                                                                                           |
| 29 Have you been working with COVID patients directly?                                                                                                   | no; not as far as I know; yes, I have been/am in a COVID team; yes, on duty                                                                                                                                                                                                                                                                                             |
| 30 Are you scared of working with COVID patients?                                                                                                        | no; yes, o being infected; yes, of dying; yes, of transmitting the virus to other non-COVID patients; yes, of transmitting the virus to my people (family/colleagues); yes, of being obliged to take medical decisions representing an ethical dilemma for me (patient selection, application of protocols)                                                             |
| 32 Do you have ethical concerns while working?                                                                                                           | no; no, I think I need to follow the protocols; yes, with selection of patients and/or protocols for selection of patients or therapeutic indications; yes, others                                                                                                                                                                                                      |
| Questions related to mental-health                                                                                                                       |                                                                                                                                                                                                                                                                                                                                                                         |
| Scoring                                                                                                                                                  |                                                                                                                                                                                                                                                                                                                                                                         |
| 34 Questions related to anxiety- How these sentences apply to you?                                                                                       | For each of the questions below: never = 0 p, sometimes = 1 p, often = 2 p, almost always = 3 p. For the index scoring, sum of all points multiplied by 2.                                                                                                                                                                                                              |
| 35 last week I was aware of dryness of my mouth                                                                                                          |                                                                                                                                                                                                                                                                                                                                                                         |
| 36 last week I experienced breathing difficulty (excessively rapid breathing, breathlessness in the absence of any physical exertion and absence of any) |                                                                                                                                                                                                                                                                                                                                                                         |
| 36 last week I experienced trembling (eg in the hands)                                                                                                   |                                                                                                                                                                                                                                                                                                                                                                         |
| 37 last week I was worried about situations in which I might panic and make a fool of myself                                                             |                                                                                                                                                                                                                                                                                                                                                                         |
| 37 last week I felt I was close to panic                                                                                                                 |                                                                                                                                                                                                                                                                                                                                                                         |
| 37 last week I was aware of the action of my heart in the absence of physical exertions (sense of heart rate increase, heart missing a beat)             |                                                                                                                                                                                                                                                                                                                                                                         |
| 38 last week I felt scared without any good reason                                                                                                       |                                                                                                                                                                                                                                                                                                                                                                         |
| 39 Questions related to stress- How these sentences apply to you?                                                                                        | For each of the questions below: never = 0 p, sometimes = 1 p, often = 2 p, almost always = 3 p. For the index scoring, sum of all points multiplied by 2.                                                                                                                                                                                                              |
| 40 last week I found it hard to wind down                                                                                                                |                                                                                                                                                                                                                                                                                                                                                                         |
| 40 last week I tended to over-react to situations                                                                                                        |                                                                                                                                                                                                                                                                                                                                                                         |
| 41 last week I felt that I was using a lot of nervous energy                                                                                             |                                                                                                                                                                                                                                                                                                                                                                         |
| 41 last week I found myself getting agitated                                                                                                             |                                                                                                                                                                                                                                                                                                                                                                         |
| 42 last week I found it difficult to relax                                                                                                               |                                                                                                                                                                                                                                                                                                                                                                         |
| 42 last week I was intolerant of anything that kept me from getting on with what I was doing                                                             |                                                                                                                                                                                                                                                                                                                                                                         |
| 42 last week I felt that I was rather touchy                                                                                                             |                                                                                                                                                                                                                                                                                                                                                                         |
| 43 Questions related to depression- How these sentences apply to you?                                                                                    | For each of the questions below: never = 0 p, sometimes = 1 p, often = 2 p, almost always = 3 p. For the index scoring, sum of all points multiplied by 2.                                                                                                                                                                                                              |
| 44 last week I couldn't seem to experience any positive feeling at all                                                                                   |                                                                                                                                                                                                                                                                                                                                                                         |
| 45 last week I found it difficult to work up the initiative to do things                                                                                 |                                                                                                                                                                                                                                                                                                                                                                         |
| 45 last week I felt that I had nothing to look forward to                                                                                                |                                                                                                                                                                                                                                                                                                                                                                         |
| 46 last week I felt down-hearted and blue                                                                                                                |                                                                                                                                                                                                                                                                                                                                                                         |
| 46 last week I was unable to become enthusiastic about anything                                                                                          |                                                                                                                                                                                                                                                                                                                                                                         |
| 47 last week I felt that life was meaningless                                                                                                            |                                                                                                                                                                                                                                                                                                                                                                         |
| 47 Questions related to PTSD symptoms- How these sentences apply to you?                                                                                 | For each of the questions below: 0= not at all, 1= a little bit, 2= moderately, 3= quite a bit, 4=extremely. For the index scoring, sum of all points multiplied by 2.                                                                                                                                                                                                  |
| Questions related to Intrusion symptoms                                                                                                                  |                                                                                                                                                                                                                                                                                                                                                                         |
| 49 last week any reminder brought back feelings about it                                                                                                 |                                                                                                                                                                                                                                                                                                                                                                         |
| 49 last week I had trouble staying asleep                                                                                                                |                                                                                                                                                                                                                                                                                                                                                                         |
| 50 last week other things kept making me think about it.                                                                                                 |                                                                                                                                                                                                                                                                                                                                                                         |
| 50 last week I thought about it when I didn't mean to                                                                                                    |                                                                                                                                                                                                                                                                                                                                                                         |
| 51 last week Pictures about it popped into my mind                                                                                                       |                                                                                                                                                                                                                                                                                                                                                                         |
| 51 last week I found myself acting or feeling like I was back at that time                                                                               |                                                                                                                                                                                                                                                                                                                                                                         |
| 51 last week I had waves of strong feelings about it                                                                                                     |                                                                                                                                                                                                                                                                                                                                                                         |
| Questions related to Avoidance symptoms                                                                                                                  |                                                                                                                                                                                                                                                                                                                                                                         |
| 52 last week I avoided letting myself get upset when I thought about it or was reminded of it                                                            |                                                                                                                                                                                                                                                                                                                                                                         |
| 53 last week I felt as if it hadn't happened or wasn't real                                                                                              |                                                                                                                                                                                                                                                                                                                                                                         |
| 53 last week I stayed away from reminders of it.                                                                                                         |                                                                                                                                                                                                                                                                                                                                                                         |
| 54 last week I thought about it when I didn't mean to                                                                                                    |                                                                                                                                                                                                                                                                                                                                                                         |
| 54 last week I was aware that I still had a lot of feelings about it, but I didn't deal with them                                                        |                                                                                                                                                                                                                                                                                                                                                                         |
| 55 last week My feelings about it were kind of numb                                                                                                      |                                                                                                                                                                                                                                                                                                                                                                         |
| 55 last week I tried to remove it from my memory                                                                                                         |                                                                                                                                                                                                                                                                                                                                                                         |
| 55 last week I tried not to talk about it                                                                                                                |                                                                                                                                                                                                                                                                                                                                                                         |
| Questions related to Hyperarousal symptoms                                                                                                               |                                                                                                                                                                                                                                                                                                                                                                         |
| 56 last week I felt irritable and angry.                                                                                                                 |                                                                                                                                                                                                                                                                                                                                                                         |
| 57 last week I was jumpy and easily startled                                                                                                             |                                                                                                                                                                                                                                                                                                                                                                         |
| 57 last week I had trouble falling asleep                                                                                                                |                                                                                                                                                                                                                                                                                                                                                                         |
| 58 last week I had trouble concentrating                                                                                                                 |                                                                                                                                                                                                                                                                                                                                                                         |
| 58 last week I felt watchful and on-guard                                                                                                                |                                                                                                                                                                                                                                                                                                                                                                         |

|                                                  | Conditional distributions given the responders gender (%)      |       |          |        | Conditional distributions given the responders age range (%) |            |            |          | p     |        |
|--------------------------------------------------|----------------------------------------------------------------|-------|----------|--------|--------------------------------------------------------------|------------|------------|----------|-------|--------|
|                                                  | women                                                          | men   | BMJ Open | vs men | <42 y.o.                                                     | 42-52 y.o. | 52-61 y.o. | >61 y.o. |       |        |
| 1 Civil status                                   | Married                                                        | 51.04 | 60.21    | 14.77  | 27.94                                                        | 32.2       | 56.74      | 61.12    | 63.22 |        |
|                                                  | Divorced                                                       | 11.75 | 7.94     | 5.68   | 16.17                                                        | 2.52       | 11.33      | 15.14    | 13.08 |        |
|                                                  | In couple                                                      | 18.40 | 17.39    | 39.77  | 23.52                                                        | 38.02      | 18.34      | 10.91    | 6.85  |        |
|                                                  | Single                                                         | 14.51 | 12.89    | 38.63  | 30.88                                                        | 27.15      | 12.85      | 10.06    | 7.2   |        |
|                                                  | Widow                                                          | 4.18  | 1.54     | 1.13   | 1.47                                                         | 0.08       | 0.71       | 2.75     | 9.63  |        |
| 2 Housing                                        | Owned apartment/house                                          | 91.08 | 90.89    | 64.36  | 72.46                                                        | 79.44      | 94.22      | 95.08    | 94.48 |        |
|                                                  | Shared apartment/house                                         | 7.7   | 7.9      | 26.43  | 23.18                                                        | 18.43      | 4.9        | 4.11     | 4.33  |        |
|                                                  | Rented room                                                    | 1.05  | 1.07     | 8.04   | 0.00                                                         | 2.01       | 0.81       | 0.67     | 0.83  | p<0.01 |
|                                                  | Centre/institution                                             | 0.13  | 0.09     | 0.00   | 0.00                                                         | 0.05       | 0.03       | 0.09     | 0.3   |        |
|                                                  | Homeless                                                       | 0.02  | 0.03     | 1.14   | 4.34                                                         | 0.05       | 0.01       | 0.02     | 0.03  |        |
| 3 Maximum Education Degree                       | Primary Education                                              | 3.52  | 4.63     | 5.68   | 5.79                                                         | 1.53       | 3.3        | 4.24     | 6.1   |        |
|                                                  | Secondary Education                                            | 5.18  | 6.17     | 3.4    | 1.44                                                         | 4.83       | 4.49       | 5.19     | 7.19  |        |
|                                                  | High School                                                    | 29.92 | 35.46    | 29.54  | 28.98                                                        | 27.54      | 30.98      | 34.17    | 33.11 |        |
|                                                  | Degree                                                         | 44.99 | 36.96    | 31.81  | 33.33                                                        | 38.72      | 43.92      | 43.48    | 44.26 | p<0.01 |
|                                                  | Master                                                         | 13.47 | 12.77    | 26.13  | 21.73                                                        | 24.32      | 14.3       | 9.7      | 5.65  |        |
| 4 Employment                                     | PhD                                                            | 2.9   | 3.98     | 3.4    | 8.69                                                         | 3.03       | 2.99       | 3.2      | 3.67  |        |
|                                                  | Qualified job                                                  | 36.95 | 34.15    | 35.22  | 37.68                                                        | 48.19      | 48.76      | 41.3     | 7.86  |        |
|                                                  | Non qualified job                                              | 3.51  | 3.78     | 9.09   | 2.89                                                         | 4.39       | 4.46       | 4.49     | 1.15  |        |
|                                                  | Job in Healthcare                                              | 10.9  | 4.67     | 9.09   | 1.44                                                         | 12.16      | 10.58      | 9.21     | 4.64  |        |
|                                                  | Home/people care                                               | 6.24  | 1.42     | 0.00   | 2.89                                                         | 0.94       | 1.69       | 3.25     | 12.86 | 0-0.01 |
| 5 Self-employed                                  | Company owner                                                  | 3.00  | 7.36     | 1.13   | 1.44                                                         | 2.39       | 5.66       | 5.9      | 3.05  |        |
|                                                  | Unemployed                                                     | 5.29  | 4.54     | 12.5   | 11.59                                                        | 7.63       | 4.62       | 5.61     | 2.69  |        |
|                                                  | Other                                                          | 26.03 | 32.63    | 23.86  | 26.08                                                        | 16.54      | 12.73      | 18.8     | 62.13 |        |
|                                                  | >2                                                             | 8.03  | 7.05     | 14.77  | 16.41                                                        | 13.59      | 3.99       | 7.26     | 6.43  |        |
|                                                  | >2                                                             | 66.29 | 68.57    | 54.54  | 55.22                                                        | 70.39      | 71.65      | 64.94    | 61.18 |        |
| 6 People financially providing at home           | 1                                                              | 25.67 | 24.37    | 30.68  | 28.35                                                        | 16012.00   | 24.35      | 27.78    | 32.38 |        |
|                                                  | No                                                             | 16.55 | 47.61    | 58.94  | 34.66                                                        | 45.98      | 16.26      | 31.39    | 67.82 |        |
|                                                  | Yes, of people of <16 y.o.                                     | 25.99 | 21.93    | 13.68  | 25.33                                                        | 33.96      | 48.69      | 13.52    | 3.07  |        |
|                                                  | Yes, of people of >16 y.o.                                     | 13.02 | 10.35    | 6.31   | 6.66                                                         | 4.81       | 12.58      | 23.54    | 6.73  |        |
|                                                  | Yes, siblings                                                  | 1.36  | 0.96     | 4.21   | 2.66                                                         | 1.57       | 0.86       | 1.33     | 1.28  | <0.01  |
| 7 Care of someone                                | Yes, parents                                                   | 16.1  | 12.66    | 10.52  | 17.33                                                        | 8.41       | 16.92      | 23.03    | 10.92 |        |
|                                                  | Yes, others                                                    | 6.95  | 6.46     | 6.31   | 13.33                                                        | 5.24       | 4.66       | 7.17     | 10.16 |        |
|                                                  | None                                                           | 40.62 | 51.34    |        |                                                              | 48.85      | 18.85      | 35.96    | 70.47 |        |
|                                                  | 1 option selected                                              | 25.9  | 22.11    | 11.3   | 5.79                                                         | 13.12      | 21.03      | 39.98    | 24.24 |        |
|                                                  | 2 options selected                                             | 28.23 | 22.83    |        |                                                              | 34.82      | 49.43      | 19.32    | 4.51  | <0.01  |
| 8 Burden of care                                 | 3 options selected                                             | 4.77  | 3.39     |        |                                                              | 2.82       | 9.88       | 4.31     | 0.61  |        |
|                                                  | 4 options selected                                             | 0.41  | 0.30     |        |                                                              | 0.31       | 0.73       | 0.38     | 0.11  |        |
|                                                  | 5 options selected                                             | 0.04  | 0.01     |        |                                                              | 0.04       | 0.04       | 0.02     | 0.02  |        |
|                                                  | No                                                             | 76.13 | 72.73    | 63.63  | 65.21                                                        | 68.4       | 69.41      | 73.65    | 88.18 |        |
|                                                  | Yes, the company made a labour force adjustment plan           | 0.18  | 0.17     | 0.00   | 0.00                                                         | 0.22       | 0.26       | 0.15     | 0.09  |        |
| 9 Loss of job                                    | Yes, the company made a temporary labour force adjustment plan | 9.70  | 10.01    | 9.09   | 7.24                                                         | 14.5       | 13.04      | 9.9      | 2.17  | <0.01  |
|                                                  | Yes, I have lost some jobs previously contracted/arranged      | 4.93  | 7.61     | 15.9   | 14.49                                                        | 6.75       | 7.17       | 6.68     | 2.54  |        |
|                                                  | Yes, I was fired                                               | 0.96  | 0.68     | 2.27   | 0.00                                                         | 1.79       | 0.96       | 0.67     | 0.16  |        |
|                                                  | Yes, others                                                    | 8.08  | 8.77     | 9.09   | 13.04                                                        | 8.3        | 9.12       | 8.93     | 6.83  |        |
|                                                  | No                                                             | 22.00 | 18.00    | 30.00  | 26.00                                                        | 20.34      | 24.48      | 22.21    | 15.82 |        |
| 10 Savings                                       | Yes                                                            | 34.00 | 40.00    | 23.00  | 28.00                                                        | 36.22      | 32.37      | 33.65    | 40.55 | <0.01  |
|                                                  | None                                                           | 44.00 | 42.00    | 48.00  | 46.00                                                        | 43.43      | 43.14      | 44.13    | 43.62 |        |
|                                                  | Yes, one                                                       | 58.75 | 59.47    | 80.68  | 57.97                                                        | 64.04      | 59.65      | 54.68    | 76.91 | <0.01  |
|                                                  | Yes, more than one                                             | 36.17 | 34.37    | 18.18  | 36.23                                                        | 31.76      | 50.8       | 39.81    | 20.66 |        |
|                                                  | No                                                             | 5.07  | 6.14     | 51.00  | 66.00                                                        | 4.18       | 6.54       | 5.49     | 2.43  |        |
| 11 Rent to pay                                   | Yes                                                            | 76.00 | 76.00    | 51.00  | 66.00                                                        | 56.64      | 75.05      | 83.23    | 87.08 |        |
|                                                  | No                                                             | 24.00 | 24.00    | 49.00  | 34.00                                                        | 43.35      | 24.94      | 16.76    | 12.91 | <0.01  |
|                                                  | Yes                                                            | 59.85 | 62.61    | 59.09  | 69.56                                                        | 64.15      | 58.86      | 60.4     | 59.52 |        |
|                                                  | A little                                                       | 22.34 | 21.56    | 13.63  | 17.39                                                        | 19.89      | 23.74      | 22.72    | 21.87 |        |
|                                                  | No                                                             | 17.80 | 15.82    | 27.27  | 13.04                                                        | 15.95      | 17.38      | 16.87    | 18.59 |        |
| 12 For social assistance/or any other assistance | Not yet, but will need to                                      | 91.42 | 90.8     | 80.68  | 81.15                                                        | 88.95      | 88.41      | 90.73    | 96.48 |        |
|                                                  | Yes                                                            | 4.71  | 5.19     | 10.22  | 8.69                                                         | 6.34       | 6.43       | 5.08     | 1.81  | <0.01  |
|                                                  | Yes                                                            | 3.85  | 3.99     | 9.09   | 10.14                                                        | 4.7        | 5.15       | 4.18     | 1.7   |        |
|                                                  | <7                                                             | 26.19 | 17.04    | 22.47  | 17.39                                                        | 21.17      | 30.35      | 26.04    | 22.72 |        |
|                                                  | 7-8.5                                                          | 20.00 | 10.22    | 20.12  | 10.14                                                        | 33.2       | 28.42      | 32.07    | 36.36 | p<0.01 |
| 13 Level of socio-economic situation -score      | 8.5-10                                                         | 32.09 | 32.95    | 33.59  | 43.47                                                        | 17.38      | 18.8       | 19.27    | 24.3  |        |
|                                                  | >10                                                            | 21.71 | 39.77    | 23.8   | 28.98                                                        | 28.24      | 22.41      | 22.6     | 16.59 |        |
|                                                  | No, I am forced to go to work                                  | 0.33  | 0.55     | 2.29   | 1.44                                                         | 0.54       | 0.56       | 0.4      | 0.1   |        |
|                                                  | No, I need to work                                             | 0.69  | 1.51     | 1.14   | 1.44                                                         | 0.75       | 0.79       | 0.88     | 1.3   |        |
|                                                  | No, I work on essential services                               | 13.73 | 12.39    | 13.79  | 7.24                                                         | 16.36      | 17.77      | 15.19    | 4.47  | p<0.01 |
| 14 Media to get information about pandemic       | Yes                                                            | 54.13 | 57.73    | 43.67  | 62.31                                                        | 43.85      | 39.51      | 48.13    | 87.39 |        |
|                                                  | Yes, teleworking                                               | 21.11 | 27.79    | 39.08  | 27.53                                                        | 39.48      | 41.35      | 36.73    | 6.71  |        |
|                                                  | Yes, going shopping                                            | 18.9  | 13.39    | 17.17  | 10.14                                                        | 17.82      | 18.59      | 16.69    | 16.19 |        |
|                                                  | Yes, to infect others                                          | 23.89 | 17.68    | 30.3   | 24.63                                                        | 28.52      | 24.76      | 22.13    | 13.85 | p<0.01 |
|                                                  | Yes, to get infected                                           | 35.04 | 30.47    | 26.26  | 27.53                                                        | 31.87      | 33.57      | 34.33    | 34.9  |        |
| 15 Elders to infect                              | Elders                                                         | 36.23 | 34.25    | 43.33  | 23.52                                                        | 42.05      | 35.33      | 36.86    | 22.98 |        |
|                                                  | Anyone                                                         | 48.63 | 51.26    | 50.00  | 70.58                                                        | 41.27      | 41.49      | 54.17    | 69.79 |        |
|                                                  | Children                                                       | 13.32 | 12.97    | 3.33   | 5.88                                                         | 14.28      | 21.55      | 7.21     | 6.47  | p<0.01 |
|                                                  | Colleagues at work                                             | 1.81  | 1.50     | 3.33   | 0.00                                                         | 2.38       | 1.61       | 1.74     | 0.74  |        |
|                                                  | No                                                             | 55.2  | 64.77    | 41.22  | 50.00                                                        | 42.95      | 51.97      | 59.86    | 77.68 |        |
| 16 Exposed consume substances                    | Yes, alcohol                                                   | 5.57  | 6.74     | 8.77   | 9.75                                                         | 8.88       | 7.23       | 5.01     | 2.47  |        |
|                                                  | Yes, food                                                      | 26.26 | 19.40    | 22.8   | 20.73                                                        | 33.04      | 27.44      | 22.72    | 13.4  | p<0.01 |
|                                                  | Yes, illegal drugs                                             | 0.25  | 0.73     | 5.26   | 2.43                                                         | 1.07       | 0.28       | 0.16     | 0.09  |        |
|                                                  | Yes, drugs to calm down                                        | 4.83  | 2.44     | 8.77   | 6.09                                                         | 4.24       | 4.99       | 4.27     | 3.07  |        |
|                                                  | Yes, tobacco                                                   | 7.85  | 5.89     | 13.15  | 10.97                                                        | 9.79       | 8.06       | 7.95     | 3.27  |        |
| 17 Media to get information about pandemic       | Social media                                                   | 30.09 | 27.20    | 35.00  | 30.88                                                        | 7.49       | 5.45       | 3.41     | 1.49  |        |
|                                                  | TV                                                             | 37.48 | 35.18    | 28.33  | 31.61                                                        | 50.54      | 50.41      | 50.03    | 48.38 |        |
|                                                  | Radio                                                          | 14.94 | 16.67    | 10.00  | 12.5                                                         | 13.74      | 20.14      | 22.9     | 25.1  |        |
|                                                  | Newspapers                                                     | 12.83 | 15.18    | 15.00  | 11.76                                                        | 19.17      | 16.7       | 17.07    | 20.19 |        |
|                                                  | Other                                                          | 4.63  | 5.74     | 11.66  | 13.23                                                        | 9.03       | 7.27       | 6.52     | 4.82  |        |
| 18 If's ok                                       | If's ok                                                        | 19.28 | 18.40    | 6.33   | 13.18                                                        | 9.76       | 17.8       | 28.13    | 26.74 |        |
|                                                  | The Government explains too much                               | 2.65  | 4.55     | 0.00   | 2.19                                                         | 1.44       | 2.28       | 3.88     | 6.66  |        |
|                                                  | The Government explains too less                               | 9.06  | 8.60     | 14.08  | 9.89                                                         | 8.99       | 8.56       | 9.7      | 8.53  | <0.01  |
|                                                  | Media explain too much                                         | 12.49 | 13.43    | 11.97  | 8.79                                                         | 9.69       | 10.46      | 14.32    | 19.21 |        |
|                                                  | Media explain too less                                         | 2.8   | 3.11     | 5.63   | 8.79                                                         | 2.68       | 2.69       | 3.53     | 2.96  |        |
| 19 Impact of the pandemic on people (subjective) | Too negative                                                   | 20.47 | 21.90    | 25.35  | 18.68                                                        | 41.88      | 26.09      | 0.24     | 0.11  |        |
|                                                  | Poorly adjusted to the reality                                 | 27.34 | 25.60    | 30.98  | 29.67                                                        | 21.13      | 25.61      | 33.57    | 31.12 |        |
|                                                  | I do not think anything about it                               | 5.87  | 4.36     | 5.63   | 8.79                                                         | 4.38       | 6.47       | 6.6      | 4.64  |        |
|                                                  | No                                                             | 18.11 | 29.88    | 23.07  | 23.25                                                        | 17.23      | 19.43      | 21.13    | 28.05 |        |
|                                                  | Yes, my personality                                            | 5.18  | 3.71     | 9.4    | 5.81                                                         | 8.17       | 8.55       | 3.59     | 2.02  |        |
| 20 Impact with someone infected by SARS-CoV-2    | Yes, my vision of the society/ho                               | 51.74 | 47.05    | 43.58  | 50.00                                                        | 50.98      | 51.86      | 52.4     | 46.36 | <0.01  |
|                                                  | Yes, my life                                                   | 24.95 | 19.34    | 23.93  | 20.93                                                        | 23.6       | 23.14      | 23.17    | 23.56 |        |
|                                                  | I do not know                                                  | 79.01 | 82.93    | 70.32  | 82.6                                                         | 75.00      | 76.77      | 79.62    | 88.72 |        |
|                                                  | Yes, with a probable non-confirmed case                        | 10.16 | 9.01     | 16.48  | 5.79                                                         | 13.05      | 11.61      | 9.79     | 5.14  | <0.01  |
|                                                  | Yes, with a confirmed case                                     | 10.81 | 8.04     | 13.18  | 11.59                                                        | 11.93      | 11.61      | 10.58    | 6.12  |        |
| 21 Presence of symptoms (since diagnosis)        | No                                                             | 22.92 | 35.72    | 11.29  | 37.75                                                        | 15.55      | 20.98      | 28.09    | 46.06 |        |
|                                                  | Headache                                                       | 17.06 | 13.02    | 13.7   | 8.16                                                         | 17.59      | 18.01      | 16.29    | 10.81 |        |
|                                                  | Sore throat                                                    | 10.51 | 7.95     | 9.27   | 13.26                                                        | 10.81      | 10.59      | 9.47     | 7.96  |        |
|                                                  | Nasal congestion/running nose                                  | 9.1   | 9.37     | 10.08  | 12.24                                                        | 12.06      | 9.05       | 8.28     | 6.2   |        |
|                                                  | Extreme fatigue/bredness                                       | 7.47  | 5.30     | 10.48  | 4.08                                                         | 7.92       | 7.57       | 6.76     | 4.77  |        |
| 22 Persistent cough (for one week or more)       | Persistent cough (for one week or more)                        | 6.96  | 6.50     | 6.85   | 7.14                                                         | 6.71       | 6.94       | 6.92     | 6.81  |        |
|                                                  | Muscle pain                                                    | 6.55  | 5.15     | 8.87   | 4.08                                                         | 6.54       | 6.78       | 6.43     | 4.67  |        |
|                                                  | Diarrhea                                                       | 5.37  | 5.32     | 8.46   | 6.12                                                         | 6.74       | 5.63       | 5.06     | 3.36  |        |
|                                                  | Dizziness                                                      | 3.14  | 1.95     | 8.06   | 2.04                                                         | 3.92       | 2.97       | 2.53     | 1.54  |        |
|                                                  | Shortness of breath                                            | 2.27  | 1.95     | 3.62   | 2.04                                                         | 2.88       | 2.48       | 1.88     | 1.19  |        |
| 23 Chest pain                                    | Chest pain                                                     | 1.96  | 1.74     | 1.2    | 2.04                                                         | 3.38       | 2.28       | 1.71     | 0.93  |        |
|                                                  | Loss of smell, small blindness                                 | 1.93  | 1.66     | 2.41   | 1.02                                                         | 2.         |            |          |       |        |

STROBE Statement—Checklist of items that should be included in reports of *cross-sectional studies*

|                              | Item No | Recommendation                                                                                                                                                                                    | Page No        |
|------------------------------|---------|---------------------------------------------------------------------------------------------------------------------------------------------------------------------------------------------------|----------------|
| <b>Title and abstract</b>    | 1       | (a) Indicate the study's design with a commonly used term in the title or the abstract                                                                                                            | 1              |
|                              |         | (b) Provide in the abstract an informative and balanced summary of what was done and what was found                                                                                               | 2              |
| <b>Introduction</b>          |         |                                                                                                                                                                                                   |                |
| Background/rationale         | 2       | Explain the scientific background and rationale for the investigation being reported                                                                                                              | 4-5            |
| Objectives                   | 3       | State specific objectives, including any prespecified hypotheses                                                                                                                                  | 5              |
| <b>Methods</b>               |         |                                                                                                                                                                                                   |                |
| Study design                 | 4       | Present key elements of study design early in the paper                                                                                                                                           | 5-6            |
| Setting                      | 5       | Describe the setting, locations, and relevant dates, including periods of recruitment, exposure, follow-up, and data collection                                                                   | 5-6            |
| Participants                 | 6       | (a) Give the eligibility criteria, and the sources and methods of selection of participants                                                                                                       | 5              |
| Variables                    | 7       | Clearly define all outcomes, exposures, predictors, potential confounders, and effect modifiers. Give diagnostic criteria, if applicable                                                          | 5-6            |
| Data sources/<br>measurement | 8*      | For each variable of interest, give sources of data and details of methods of assessment (measurement). Describe comparability of assessment methods if there is more than one group              | 5-7            |
| Bias                         | 9       | Describe any efforts to address potential sources of bias                                                                                                                                         | 6-7            |
| Study size                   | 10      | Explain how the study size was arrived at                                                                                                                                                         | 7              |
| Quantitative variables       | 11      | Explain how quantitative variables were handled in the analyses. If applicable, describe which groupings were chosen and why                                                                      | N/A            |
| Statistical methods          | 12      | (a) Describe all statistical methods, including those used to control for confounding                                                                                                             | 6-8            |
|                              |         | (b) Describe any methods used to examine subgroups and interactions                                                                                                                               | 6-8            |
|                              |         | (c) Explain how missing data were addressed                                                                                                                                                       | 6-8            |
|                              |         | (d) If applicable, describe analytical methods taking account of sampling strategy                                                                                                                | 6-8            |
|                              |         | (e) Describe any sensitivity analyses                                                                                                                                                             | N/A            |
| <b>Results</b>               |         |                                                                                                                                                                                                   |                |
| Participants                 | 13*     | (a) Report numbers of individuals at each stage of study—eg numbers potentially eligible, examined for eligibility, confirmed eligible, included in the study, completing follow-up, and analysed | 5, 8           |
|                              |         | (b) Give reasons for non-participation at each stage                                                                                                                                              | N/A            |
|                              |         | (c) Consider use of a flow diagram                                                                                                                                                                | -              |
| Descriptive data             | 14*     | (a) Give characteristics of study participants (eg demographic, clinical, social) and information on exposures and potential confounders                                                          | 8-11           |
|                              |         | (b) Indicate number of participants with missing data for each variable of interest                                                                                                               | 29-34          |
| Outcome data                 | 15*     | Report numbers of outcome events or summary measures                                                                                                                                              | 8-11,<br>29-34 |

1  
2  
3  
4  
5  
6  
7  
8  
9  
10  
11  
12  
13  
14  
15  
16  
17  
18  
19  
20  
21  
22  
23  
24  
25  
26  
27  
28  
29  
30  
31  
32  
33  
34  
35  
36  
37  
38  
39  
40  
41  
42  
43  
44  
45  
46  
47  
48  
49  
50  
51  
52  
53  
54  
55  
56  
57  
58  
59  
60

|                          |    |                                                                                                                                                                                                              |             |
|--------------------------|----|--------------------------------------------------------------------------------------------------------------------------------------------------------------------------------------------------------------|-------------|
| Main results             | 16 | (a) Give unadjusted estimates and, if applicable, confounder-adjusted estimates and their precision (eg, 95% confidence interval). Make clear which confounders were adjusted for and why they were included | 8-11, 29-34 |
|                          |    | (b) Report category boundaries when continuous variables were categorized                                                                                                                                    |             |
|                          |    | (c) If relevant, consider translating estimates of relative risk into absolute risk for a meaningful time period                                                                                             |             |
| Other analyses           | 17 | Report other analyses done—eg analyses of subgroups and interactions, and sensitivity analyses                                                                                                               |             |
| <b>Discussion</b>        |    |                                                                                                                                                                                                              |             |
| Key results              | 18 | Summarise key results with reference to study objectives                                                                                                                                                     | 17          |
| Limitations              | 19 | Discuss limitations of the study, taking into account sources of potential bias or imprecision. Discuss both direction and magnitude of any potential bias                                                   | 11          |
| Interpretation           | 20 | Give a cautious overall interpretation of results considering objectives, limitations, multiplicity of analyses, results from similar studies, and other relevant evidence                                   | 11-17       |
| Generalisability         | 21 | Discuss the generalisability (external validity) of the study results                                                                                                                                        | 11-17       |
| <b>Other information</b> |    |                                                                                                                                                                                                              |             |
| Funding                  | 22 | Give the source of funding and the role of the funders for the present study and, if applicable, for the original study on which the present article is based                                                | 19          |

\*Give information separately for exposed and unexposed groups.

**Note:** An Explanation and Elaboration article discusses each checklist item and gives methodological background and published examples of transparent reporting. The STROBE checklist is best used in conjunction with this article (freely available on the Web sites of PLoS Medicine at <http://www.plosmedicine.org/>, Annals of Internal Medicine at <http://www.annals.org/>, and Epidemiology at <http://www.epidem.com/>). Information on the STROBE Initiative is available at [www.strobe-statement.org](http://www.strobe-statement.org).

# BMJ Open

## Identification of the most vulnerable populations in the psycho-social sphere: a cross-sectional study conducted in Catalonia during the strict lockdown imposed against the Covid-19 pandemic.

|                                 |                                                                                                                                                                                                                                                                                                                                                                                                                                                                                                                                                                                                                                                                                                                                                                                                                                                                                                                                                                                                                                                                                                                                                                                                                                                                                                                                                                                                                                                                                                    |
|---------------------------------|----------------------------------------------------------------------------------------------------------------------------------------------------------------------------------------------------------------------------------------------------------------------------------------------------------------------------------------------------------------------------------------------------------------------------------------------------------------------------------------------------------------------------------------------------------------------------------------------------------------------------------------------------------------------------------------------------------------------------------------------------------------------------------------------------------------------------------------------------------------------------------------------------------------------------------------------------------------------------------------------------------------------------------------------------------------------------------------------------------------------------------------------------------------------------------------------------------------------------------------------------------------------------------------------------------------------------------------------------------------------------------------------------------------------------------------------------------------------------------------------------|
| Journal:                        | <i>BMJ Open</i>                                                                                                                                                                                                                                                                                                                                                                                                                                                                                                                                                                                                                                                                                                                                                                                                                                                                                                                                                                                                                                                                                                                                                                                                                                                                                                                                                                                                                                                                                    |
| Manuscript ID                   | bmjopen-2021-052140.R2                                                                                                                                                                                                                                                                                                                                                                                                                                                                                                                                                                                                                                                                                                                                                                                                                                                                                                                                                                                                                                                                                                                                                                                                                                                                                                                                                                                                                                                                             |
| Article Type:                   | Original research                                                                                                                                                                                                                                                                                                                                                                                                                                                                                                                                                                                                                                                                                                                                                                                                                                                                                                                                                                                                                                                                                                                                                                                                                                                                                                                                                                                                                                                                                  |
| Date Submitted by the Author:   | 04-Oct-2021                                                                                                                                                                                                                                                                                                                                                                                                                                                                                                                                                                                                                                                                                                                                                                                                                                                                                                                                                                                                                                                                                                                                                                                                                                                                                                                                                                                                                                                                                        |
| Complete List of Authors:       | <p>Farrés, Judith; Anaxomics Biotech SL Systems Biology Solutions Ruiz, Jose Luis; Anaxomics Biotech SL Systems Biology Solutions Mas, Jose Manuel; Anaxomics Biotech SL Systems Biology Solutions Arias, Lilibeth; Fundació Institut d'Investigació en Ciències de la Salut Germans Trias i Pujol, Experimental Tuberculosis Unit; CIBERES Sarrias, Maria-Rosa; Fundació Institut d'Investigació en Ciències de la Salut Germans Trias i Pujol, Innate Immunity Group; CIBEREHD Armengol, Carolina; Fundació Institut d'Investigació en Ciències de la Salut Germans Trias i Pujol, Childhood Liver Oncology Group; CIBEREHD Cardona, Pere-Joan; Fundació Institut d'Investigació en Ciències de la Salut Germans Trias i Pujol, Experimental Tuberculosis Unit. UAB.; CIBERES</p> <p>Munoz-Moreno, Jose A; Fundació Lluita Contra la Sida; Universitat Oberta de Catalunya, Facultat de Psicologia i Ciències de l'Educació Vilaplana, Miriam; Parc Sanitari Sant Joan de Deu</p> <p>Arranz, Belen; Parc Sanitari Sant Joan de Deu, Institut de Recerca Sant Joan de Deu; CIBERSAM</p> <p>Usall, Judith; Parc Sanitari Sant Joan de Deu, Institut de Recerca Sant Joan de Deu</p> <p>Serrano-Blanco, Antoni; Parc Sanitari Sant Joan de Deu, Institut de Recerca Sant Joan de Deu; CIBERESP</p> <p>Vilaplana, Cristina; Fundació Institut d'Investigació en Ciències de la Salut Germans Trias i Pujol, Unitat de Tuberculosi Experimental. Universitat Autònoma de Barcelona (UAB); CIBERES</p> |
| <b>Primary Subject Heading</b>: | Public health                                                                                                                                                                                                                                                                                                                                                                                                                                                                                                                                                                                                                                                                                                                                                                                                                                                                                                                                                                                                                                                                                                                                                                                                                                                                                                                                                                                                                                                                                      |
| Secondary Subject Heading:      | Global health, Infectious diseases, Health policy                                                                                                                                                                                                                                                                                                                                                                                                                                                                                                                                                                                                                                                                                                                                                                                                                                                                                                                                                                                                                                                                                                                                                                                                                                                                                                                                                                                                                                                  |
| Keywords:                       | Public health < INFECTIOUS DISEASES, COVID-19, Health policy < HEALTH SERVICES ADMINISTRATION & MANAGEMENT, HEALTH SERVICES ADMINISTRATION & MANAGEMENT                                                                                                                                                                                                                                                                                                                                                                                                                                                                                                                                                                                                                                                                                                                                                                                                                                                                                                                                                                                                                                                                                                                                                                                                                                                                                                                                            |
|                                 |                                                                                                                                                                                                                                                                                                                                                                                                                                                                                                                                                                                                                                                                                                                                                                                                                                                                                                                                                                                                                                                                                                                                                                                                                                                                                                                                                                                                                                                                                                    |

1  
2  
3  
4  
5  
6  
7  
8  
9  
10  
11  
12  
13  
14  
15  
16  
17  
18  
19  
20  
21  
22  
23  
24  
25  
26  
27  
28  
29  
30  
31  
32  
33  
34  
35  
36  
37  
38  
39  
40  
41  
42  
43  
44  
45  
46  
47  
48  
49  
50  
51  
52  
53  
54  
55  
56  
57  
58  
59  
60

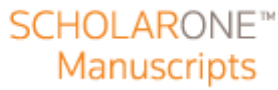



I, the Submitting Author has the right to grant and does grant on behalf of all authors of the Work (as defined in the below author licence), an exclusive licence and/or a non-exclusive licence for contributions from authors who are: i) UK Crown employees; ii) where BMJ has agreed a CC-BY licence shall apply, and/or iii) in accordance with the terms applicable for US Federal Government officers or employees acting as part of their official duties; on a worldwide, perpetual, irrevocable, royalty-free basis to BMJ Publishing Group Ltd ("BMJ") its licensees and where the relevant Journal is co-owned by BMJ to the co-owners of the Journal, to publish the Work in this journal and any other BMJ products and to exploit all rights, as set out in our [licence](#).

The Submitting Author accepts and understands that any supply made under these terms is made by BMJ to the Submitting Author unless you are acting as an employee on behalf of your employer or a postgraduate student of an affiliated institution which is paying any applicable article publishing charge ("APC") for Open Access articles. Where the Submitting Author wishes to make the Work available on an Open Access basis (and intends to pay the relevant APC), the terms of reuse of such Open Access shall be governed by a Creative Commons licence – details of these licences and which [Creative Commons](#) licence will apply to this Work are set out in our licence referred to above.

Other than as permitted in any relevant BMJ Author's Self Archiving Policies, I confirm this Work has not been accepted for publication elsewhere, is not being considered for publication elsewhere and does not duplicate material already published. I confirm all authors consent to publication of this Work and authorise the granting of this licence.



1  
2  
3  
4  
5  
6  
7  
8  
9  
10  
11  
12  
13  
14  
15  
16  
17  
18  
19  
20  
21  
22  
23  
24  
25  
26  
27  
28  
29  
30  
31  
32  
33  
34  
35  
36  
37  
38  
39  
40  
41  
42  
43  
44  
45  
46  
47  
48  
49  
50  
51  
52  
53  
54  
55  
56  
57  
58  
59  
60

2  
4  
8

**Identification of the most vulnerable populations in the psycho-social sphere: a cross-sectional study conducted in Catalonia during the strict lockdown imposed against the Covid-19 pandemic**

Judith Farrés<sup>1</sup>, José Luis Ruiz<sup>1</sup>, José Manuel Mas<sup>1</sup>, Lilibeth Arias<sup>2,3</sup>, Maria-Rosa Sarrias<sup>4,5</sup>, Carolina Armengol<sup>5,6</sup>, Pere-Joan Cardona<sup>2,3</sup>, Jose A. Munoz-Moreno<sup>7,8</sup>, Miriam Vilaplana<sup>9</sup>, Belén Arranz<sup>9,10,11</sup>, Judith Usall<sup>9,11</sup>, Antoni Serrano-Blanco<sup>9,11,12</sup>, Cristina Vilaplana<sup>2,3,\*</sup>

- 10 1. Anaxomics Biotech SL. C/ Diputació, 237, 1-1, 08007 Barcelona, Spain
- 12 2. Experimental Tuberculosis Unit (UTE). Fundació Institut Germans Trias i Pujol (IGTP). Universitat Autònoma de Barcelona (UAB). Edifici Mar. Can Ruti Campus. Ctra. de Can Ruti, camí de les Escoles, s/n, 08916 Badalona, Catalonia, Spain
- 14 3. Centro de Investigación Biomédica en Red de Enfermedades Respiratorias (CIBERES). Av. Monforte de Lemos, 3-5, pavelló 11, planta 0, 28029, Madrid, Spain
- 16 4. Innate Immunity Group. Fundació Institut Germans Trias i Pujol (IGTP). Can Ruti Campus. Edifici Muntanya. Ctra. de Can Ruti, camí de les Escoles, s/n, 08916 Badalona, Catalonia, Spain
- 18 5. Centro de Investigación Biomédica en Red de Enfermedades Hepáticas y Digestivas (CIBEREHD). Av. Monforte de Lemos, 3-5, pavelló 11, planta 0, 28029 Madrid, Spain.
- 20 6. Childhood Liver Oncology Group, Germans Trias i Pujol Research Institute (IGTP), Program of Predictive and Personalized Medicine of Cancer (PMPCC), Edifici Muntanya. Can Ruti Campus. Ctra. de Can Ruti, camí de les Escoles, s/n, 08916 Badalona, Catalonia, Spain
- 22 7. Fundació Lluita contra la SIDA (FLS) - Servei de Malalties Infeccioses, Hospital Germans Trias i Pujol, Crtra. Del Canyet, s/n. 08916. Badalona, Spain
- 24 8. Facultat de Psicologia i Ciències de l'Educació, Universitat Oberta de Catalunya (UOC), Rambla del Poblenou, 156. 08018. Barcelona, Spain
- 26 9. Parc Sanitari Sant Joan de Déu. C/Antoni Pujadas, 42, 08830 Sant Boi de Llobregat, Spain
- 28 10. Centro de Investigación Biomédica en Red de Salud Mental (CIBERSAM). Av. Monforte de Lemos, 3-5, pavelló 11, planta 0, 28029 Madrid, Spain
- 30 11. Institut de Recerca Sant Joan de Déu. C/ Santa Rosa, 39-57, 3a planta, 08940 Esplugues de Llobregat, Spain.
- 32 12. Centro de Investigación Biomédica en Red de Epidemiología y Salud Pública (CIBERESP). Av. Monforte de Lemos, 3-5, 28029 Madrid, Spain

38 **Corresponding author\*:**

Cristina Vilaplana, MD, PhD

ORCID: <https://orcid.org/0000-0002-2808-7270>

Principal Investigator

Fundació Institut Germans Trias i Pujol (IGTP), Experimental Tuberculosis Unit (UTE), Campus Can Ruti. Crtra. de Can Ruti, Camí de les Escoles, s/n, 08916 Badalona, Catalonia, Spain

Telephone: +34 93 033 0527

[cvilaplana@igtp.cat](mailto:cvilaplana@igtp.cat)

## Abstract

2 **Design and Objectives:** A cross-sectional study to evaluate the impact of Covid-19 on  
3  
4  
5  
6  
7  
8 the psycho-social sphere in both the general population and healthcare workers (HCWs).

9  
10  
11  
12  
13  
14  
15  
16  
17  
18  
19  
20  
21  
22  
23  
24  
25  
26  
27  
28  
29  
30  
31  
32  
33  
34  
35  
36  
37  
38  
39  
40  
41  
42  
43  
44  
45  
46  
47  
48  
49  
50  
51  
52  
53  
54  
55  
56  
57  
58  
59  
60  
**Methods:** The study was conducted in Catalonia (Spain) during the first wave of the  
Covid-19 pandemic when strict lockdown was in force. The study population included  
all people aged over 16 years who consented to participate in the study and completed the  
survey, in this case a 74-question questionnaire shared via social media using snowball  
sampling. A total of 56,656 completed survey questionnaires were obtained between the  
3rd and the 19<sup>th</sup> of April 2020.

The primary and secondary outcome measures included descriptive statistics for the non-  
psychological questions and the psychological impact of the pandemic, such as  
depression, anxiety, stress and post-traumatic stress disorder (PTSD) question scores.

**Results:** An early and markedly negative impact on family finances, fear of working with  
Covid-19 patients and ethical issues related to Covid-19 care among HCWs was  
observed. A total of seven target groups at higher risk of impaired mental health and  
which may therefore benefit from an intervention were identified, namely women,  
subjects aged less than 42 years, people with a care burden, socioeconomically deprived  
groups, people with unskilled or unqualified jobs, Covid-19 patients, and HCWs working  
with Covid-19 patients.

**Conclusions:** Active implementation of specific strategies to increase resilience and to  
prepare an adequate organizational response should be encouraged for the seven groups  
identified as high risk and susceptible to benefit from an intervention.

**Study registration:** ClinicalTrials.gov identifier (NCT number) NCT04378452.

## Strengths

1  
2  
3  
4  
5  
6  
7  
8  
9  
10  
11  
12  
13  
14  
15  
16  
17  
18  
19  
20  
21  
22  
23  
24  
25  
26  
27  
28  
29  
30  
31  
32  
33  
34  
35  
36  
37  
38  
39  
40  
41  
42  
43  
44  
45  
46  
47  
48  
49  
50  
51  
52  
53  
54  
55  
56  
57  
58  
59  
60

• The current study aimed to identify the impacts of the Covid-19 pandemic on a wide range of health-related dimensions two weeks after starting strict lockdown and while it was still in force.

• The survey rapidly reached a large number of people without exposing interviewers to infection, thus becoming one of the most extensive surveys ever published. A total of 56,656 survey questionnaires were analysed, thus representing 0.85% of the Catalan population aged >16 years

### 8 **Limitations**

- The survey was long (74 questions), thus allowing to collect a large amount of data, but this might also have generated fatigue and a high drop-out rate.
- No validated scales were used.
- The snowball strategy via social media does not allow the study population to be controlled, therefore this is not a representative survey of a specific population.

## 1. Introduction

2 By 30th March 2020, 78,797 confirmed cases of SARS-CoV-2, 6528 deaths and 14,709  
3  
4  
5  
6 patients who had recovered had been reported in Spain [1]. Of these, 16,157 cases and  
7  
8  
9  
10 1410 deaths were recorded in Catalonia [2]. The case fatality (8%) was calculated using  
11  
12 recorded cases, although the mortality rate was uncertain and the total number of cases  
13  
14 was unknown. At that time, there was local transmission of SARS-CoV-2 in the  
15  
16 community. Everyone with a compatible respiratory condition was considered likely to  
17  
18 be a case of SARS-CoV-2, although an etiological diagnosis was not possible for all  
19  
20 suspected cases in the context of a health emergency because of the lack of diagnostic  
21  
22 kits and saturation of the health system [3,4].  
23  
24

25  
26 In this context, 16% of all cases confirmed in Catalonia by 30th March 2020 affected  
27  
28 healthcare workers (HCWs) [2]. In addition to their obviously increased risk of being  
29  
30 infected, frontline HCWs (emergency rooms, ICUs, and other departments) fighting the  
31  
32 SARS-CoV-2 epidemic were faced with high levels of stress and anxiety. This worsened  
33  
34 as the tensions in the Health Systems increased, which required them to face important  
35  
36 ethical dilemmas, including patient triage.  
37  
38

39  
40 Previous major outbreaks of infectious diseases, such as Ebola, have demonstrated that  
41  
42 they have an important impact at both an individual and a community level as health  
43  
44 services, social systems and economic productivity are all severely affected [5]. Indeed,  
45  
46 an important impact on mental health and emotional burden as a result of the SARS-CoV-  
47  
48 2 pandemic and mass quarantines, similar to those observed during other epidemics, has  
49  
50 been reported [6–9]. However, a certain degree of anxiety is necessary for the adoption  
51  
52 of precautionary measures against infection outbreaks [10] and to ensure the successful  
53  
54 implementation of public health interventions. Additionally, the SARS epidemic showed  
55  
56  
57  
58  
59  
60

1  
2  
3 that frontline HCWs suffered from chronic stress at the time and that this lasted for at  
4  
5 2 least one year after the epidemic wave had receded [11].  
6

7  
8 At the time of the strict lockdown in Spain, members of society and HCWs raised their  
9  
10 4 concerns about how the outbreak and the measures implemented by the government were  
11  
12 impacting people's lives. With the aim of assessing the nature of this effect and the  
13  
14 6 hypothesis that it may be important in several health dimensions, we designed the present  
15  
16 study in order to evaluate the impact of Covid-19 on the psychosocial sphere for both the  
17  
18 8 general population and HCWs.  
19  
20

## 21 **2. Materials and Methods**

### 22 **2.1. Design and setting**

23  
24 10 This is a cross-sectional study, conducted in Catalonia (Spain) in April 2020, during the  
25  
26 12 first wave of the Covid-19 outbreak, two weeks after the implementation of strict  
27  
28 lockdown and while this was still in force.  
29  
30  
31

### 32 **2.2. Participants**

33  
34 14 Anyone aged over 16 years willing to participate in the study and who gave consent by  
35  
36 16 starting the questionnaire.  
37  
38  
39  
40  
41

### 42 **2.3. Ethics**

43  
44 18 Before starting the survey, participants were informed about the aim of the study, the  
45  
46 20 compliance with their rights and the existence of IRB approval (PI-20-114, from the  
47  
48 Germans Trias i Pujol Hospital Ethics Committee). They were also informed about their  
49  
50 right of access, rectification, limitation and erasure of their personal data and to withdraw  
51  
52 consent, as well as how to exercise any of these rights.  
53  
54  
55  
56  
57  
58  
59  
60

## 2.4. Outcome measures

2 Descriptive statistics for the non-psychological questions and depression, anxiety, stress  
3 and post-traumatic stress disorder (PTSD) scores to determine the psychological impact  
4 of the outbreak. The anonymous questionnaire was developed by the research team and  
5 included 74 questions (Supplementary Table 1). To obtain demographical, health status  
6 and mental health data, questions reported in the literature were used. In contrast,  
7 questions to evaluate the socio-economic sphere and habits during lockdown were created  
8 by the research team. A pilot test was conducted in order to evaluate the validity and  
9 reliability of the instrument and to detect any errors in its administration. The  
10 questionnaire was adjusted in light of these results before launch. The questionnaire was  
11 created using the Typeform software (Typeform SL, Barcelona, Spain) and complied with  
12 the European General Data Protection Regulation (GDPR). The survey was shared in five  
13 different languages (Catalan, Spanish, English, Italian, and French) via social media  
14 (WhatsApp, Telegram channels, institutional websites) using snowball sampling. HCW  
15 WhatsApp groups and telegram channels, as well as hospital institutional websites, were  
16 used to reach HCWs.

17 Completion of the whole questionnaire took approximately 10 minutes. Initially we  
18 estimated that approximately 2000 completed questionnaires within a period of six  
19 months (April-September 2020) would allow us to extract valid results. As we received  
20 a high number of completed questionnaires in just a few weeks, we analysed all  
21 completed questionnaires obtained between the 3rd and 19th of April 2020. After  
22 collection, data were downloaded as a spreadsheet file (Excel Microsoft Office) and  
deleted from the Typeform software.

## 2.5. Analysis and Statistics

2 All data were processed anonymously. Questionnaires in which the participant did not  
3 reach the end were considered to be incomplete and were discarded. Only finished  
4 questionnaires were saved and taken into account for the analysis. Individuals reaching  
5 the end of the questionnaire could leave questions unanswered. For individual questions,  
6 only the answers for that variable were considered. Questions were grouped into indices  
7 (socioeconomic precariousness index, depression index, anxiety index, stress index, or  
8 PTSD) following the calculation detailed in Table S1. When computing a combined score  
9 for several questions, this score was only computed if all answers for it were present.  
10 Since there were no specific criteria for age stratification or the population density that  
11 was significant for all questions, it was decided to divide these categories into groups  
12 with a similar sample size, thus resulting in the following age groups: <42, 42-52, 52-61,  
13 >61. Given the volume of responses obtained, age ranges were determined statistically to  
14 ensure that they were homogeneous in terms of number of surveys completed per group.  
15 The scores for the socio-economic precariousness index and population density  
16 (inhabitants/km<sup>2</sup>) of the municipality where the respondents lived, as stated by the  
17 respondents, were also segmented into four groups each following the same strategy. The  
18 four score ranges established for the 0-19 socio-economic precariousness scale were: low  
19 ≤7 points, mid-low=7-8.5, mid-high=8.5-10 and high >10 points.  
20 All results were obtained considering that the respondents were part of the totality of the  
21 cohort of respondents. Responses were also analyzed by category and broken down into  
22 percentages according to conditional distributions, taking into account the gender of the  
23 respondents and their age group. We took the non-binary gender and those who preferred  
24 not to say which gender they identify as into account when analyzing the results, as this  
25 enriches the conclusions. However, statistical analysis often does not take into account

1  
2  
3 the minimum volumes of responses, therefore only the groups of women and men were  
4  
5 2 compared.

6  
7 Response percentages were calculated based on the number of respondents for each  
8  
9  
10 4 answer out of the total number of responses to each question. To assess whether the  
11  
12 categorical variables were significantly related or not, we applied the Chi-Square test  
13  
14 6 independently to the counts observed. We conducted a bivariate analysis between scores  
15  
16 and sociodemographic variables. Differences in score distribution between different  
17  
18 8 groups were assessed by comparing probability distributions using a two-band Wilcoxon  
19  
20 signed-rank test and calculating the p-value using Matlab's "signrank" function [12,13].  
21  
22

23  
24 10 All tests were applied bilaterally using a significance of 5% ( $p < 0.05$ ).

### 25 26 3. Results

#### 27 28 12 3.1. Characteristics of the cohort

29  
30 We analyzed 56,656 questionnaires. The characteristics of the cohort are described in  
31  
32  
33 14 Table 1. Differences between categories by gender and age are presented in  
34  
35 Supplementary Table 2. The majority of respondents were female (70.4%) and from  
36  
37 16 Catalonia (95.63%, with 27.7% being from Barcelona city), which represents 0.85% of  
38  
39 the Catalan population aged >16 years [2,14].  
40

41  
42 18 Those living most precariously were aged under 42 years, with 18.43% sharing an  
43  
44 apartment/house ( $p < 0.01$ ). Most respondents had a degree (42.62%), and a qualified job  
45  
46 20 (36.13%). Around 9% of all respondents worked in the healthcare sector. Most  
47  
48 unemployed people were in the younger age range (7.6%) and in the non-binary/those  
49  
50 22 who preferred not to say groups (approximately 12% each).

51  
52  
53 Around 60% of all respondents declared that they were taking care of someone: 24.81%  
54  
55 24 caring for children aged <16 years and 15.11% caring for parents. Women were  
56  
57 caregivers more frequently than men ( $p < 0.01$ ). The burden of care was also higher for  
58  
59  
60



1  
2  
3 women and people aged 42-61 years ( $p<0.01$ ) and worryingly high for 4.79% of all  
4  
5 2 respondents.  
6

### 7 **3.2. Impact of the pandemic on the general population**

8  
9  
10 4 The impact on the general population is described in Tables 2, 3 and Supplementary Table  
11  
12 2. Thus, 85.32% of the cohort declared they were remaining at home. Those working in  
13  
14 6 essential services were mostly women or of non-binary gender, and the percentage of  
15  
16 women was also higher amongst those who were obliged to go to work on-site ( $p<0.01$ ).  
17  
18 8 Only two weeks after starting the lockdown, 25% of the cohort had already lost their job.  
19  
20 People aged less than 52 years, as opposed to those aged over 52 years, and men, as  
21  
22 10 opposed to women, were the most affected ( $p<0.01$ ). In addition, 20.67% of respondents  
23  
24 declared that they had no savings at all (Table 1). After the implementation of measures  
25  
26 12 announced by the authorities to cope with the pandemic, 82.75% of respondents declared  
27  
28 that they were being careful or had decreased their expenses. Up to 8.78% of respondents  
29  
30 14 declared that they had used social services or that they would need to use them soon, with  
31  
32 those aged less than 52 years and people identifying as non-binary or preferring not to  
33  
34 16 say being the most affected. Respondents aged less than 42 years, followed by people  
35  
36 aged over 61 years and people identifying as non-binary gender had the highest  
37  
38 precariousness index values ( $p<0.01$ ).  
39  
40  
41  
42  
43

44  
45 Around 19.84% of respondents declared that they had come into contact with someone  
46  
47 20 infected by SARS-CoV-2, half of them with a confirmed or probable case (more frequent  
48  
49 for women aged less than 52 years,  $p<0.01$ ). Similarly, 35.75% declared that they had  
50  
51 22 used at least one existing healthcare resource or one put in place by the authorities in the  
52  
53 context of the pandemic during the previous 14 days, and 73.82% reported having had  
54  
55 24 one or more symptoms compatible with Covid-19. Less than 2% of people claiming to  
56  
57 have had symptoms had undergone a PCR test. A greater percentage of women and those  
58  
59  
60

1  
2  
3 aged less than 42 years said that they felt worse at the moment they answered the survey  
4  
5 2 compared with people in other groups ( $p<0.01$ ).  
6

7  
8 Some 42.05% of respondents said they had increased their consumption habits, in most  
9  
10 4 cases of food. Women aged less than 42 years showed the largest increase in consumption  
11  
12 (except for illegal drugs) compared with other groups ( $p<0.01$ ).  
13

14 6 TV, followed by social media, was the main source of information regarding the  
15  
16 pandemic, with no significant differences being found between different genders or age  
17  
18 groups. Around 26.82% of respondents declared that the information given did not  
19  
20 accurately reflect reality (more frequent in women and people aged over 52 years  
21  
22 ( $p<0.01$ ), and a further 20.92% said that it was too negative or too sensationalist (more  
23  
24 frequent in men and people aged less than 42 years ( $p<0.01$ ). Similarly, 73.13% declared  
25  
26 that they were afraid or worried, with this group including more women but a lower  
27  
28 percentage of people aged over 61 years ( $p<0.01$ ). Finally, 78.56% of the cohort declared  
29  
30 that the pandemic had changed them, most of them (50.41%) as regards the way that they  
31  
32 see society/how we used to live. Those most affected were women (more than men) and  
33  
34 those aged less than 42 years vs their counterparts aged  $>61$  years ( $p<0.01$  in both cases).  
35  
36  
37  
38  
39

### 40 **3.3. Impact of the pandemic on HCWs**

41  
42 18 A total of 5104 people (9.05% of the total) identified themselves as workers in the  
43  
44 healthcare sector, most of them being women. While the proportion women/men in the  
45  
46 total cohort was 70/30, in this subgroup the proportion was 85/15. The impact on this  
47  
48 population is detailed in Table 4. Thus, 41.65% of HCWs declared that they had worked  
49  
50 directly with Covid-19 patients, 32% of them while on duty. The majority of HCWs said  
51  
52 that they were afraid to work with Covid-19 patients (75.87%): 42.90% due to the risk of  
53  
54 transmitting the infection to their relatives/friends, 17.07% due to the risk of getting  
55  
56 infected or transmitting it to other patients, and 4.28% due to the risk of dying.  
57  
58  
59  
60

1  
2  
3 Surprisingly, fear of dying decreased with age. In all cases, higher percentages of younger  
4  
5 2 HCWs said they were afraid ( $p<0.01$ ).

6  
7 More than 6% of HCWs (6.27%) were worried about taking medical decisions that  
8  
9  
10 4 represented an ethical problem for them, and nearly 18.60% of them declared that they  
11  
12 had encountered ethical problems/dilemmas/issues while working. Of these, the younger  
13  
14 6 the respondents the higher the percentage, especially as regards patient triage and  
15  
16 obligatory protocols ( $p<0.01$ ). A total of 437 out of 5104 HCWs chose to explain the  
17  
18  
19 8 ethical problems and other issues they had experienced, as shown in Table 4.

### 21 3.4. Impact of the pandemic on mental health status

22  
23  
24 10 Table 5 summarizes the conditions found to be statistically significantly associated  
25  
26 ( $p<0.05$ ) with the mental health symptoms evaluated. On the basis of this table, we have  
27  
28 12 identified seven target groups susceptible to benefitting from an intervention, and which  
29  
30 should be taken into account when designing new contention measures to cope with the  
31  
32  
33 14 pandemic: 1) women; 2) people aged under 42 years; 3) caregivers; 4) people working in  
34  
35 essential services or non-qualified jobs; 5) people with a higher precariousness index; 6)  
36  
37 16 Covid-19 patients; and 7) HCWs, especially those working with Covid-19 patients.

## 40 4. Discussion

41  
42 18 The current study aimed to identify the impacts of the Covid-19 pandemic on a wide  
43  
44 range of health status dimensions in Catalonia while lockdown was in force. It is one of  
45  
46  
47 20 the most extensive surveys ever published, with a total of 56,656 questionnaires analysed,  
48  
49 but nevertheless has limitations that must be considered when interpreting the data. Thus,  
50  
51 22 although our survey provides information about how people of different age ranges, and  
52  
53 specifically woman and HCWs, have faced the pandemic in several spheres, it was not  
54  
55  
56 24 designed to be representative of a specific population. The survey was long, which may  
57  
58 have generated fatigue and a high drop-out rate, although this also allowed us to collect  
59  
60

1  
2  
3 a large volume of data. In addition, it was shared via social media, thus the sample of the  
4  
5 2 population studied could not be controlled. However, although not ensuring  
6  
7 representability, the snowball method proved to be a successful strategy that allowed us  
8  
9  
10 4 to rapidly reach a large number of people without exposing interviewers to infection.  
11  
12 Another limitation is that the criteria used to establish ranges for some of the variables  
13  
14 6 were statistical, in order to obtain balanced groups in terms of number of responses. This  
15  
16 provides rigor but can be confusing because this segmentation is unusual and can lead to  
17  
18  
19 8 some degree of bias.

20  
21 With regard to the impact on the socioeconomic sphere, the highest level of  
22  
23 10 precariousness, which according to our results seems to occur in people aged less than 42  
24  
25 years, is striking. Of particular concern is the fact that 25% of respondents had  
26  
27  
28 12 experienced a decreased workload due to the epidemic situation, especially men, more of  
29  
30 whom had lost more jobs or previously contracted assignments, and those aged less than  
31  
32  
33 14 52 years, many of whom had been made redundant or put on temporary furlough. In  
34  
35 addition, a quarter of respondents had no savings to protect them against contingencies,  
36  
37  
38 16 and up to 8.78% stated that they had applied for social benefits or that they would do so  
39  
40 soon. Socioeconomic precariousness was found to be one of the factors associated with  
41  
42  
43 18 higher scores on the mental health indices, which is rather worrying given that the  
44  
45 incidence of the pandemic was also more pronounced in the poorest neighborhoods, at  
46  
47  
48 20 least in Barcelona [15].

49  
50 A value of approximately 20% for the population affected at mental health level seems  
51  
52 22 consistent according to literature [7,16,17], even if higher percentages have been found  
53  
54 in some cases [18,19]. Although no validated scales were used, the inclusion of 41  
55  
56 24 questions related to depression, anxiety, stress and PTSD symptoms allowed us to explore  
57  
58 the impact on the mental health dimension. We identified up to seven target groups at  
59  
60

1  
2  
3  
4  
5  
6  
7  
8  
9  
10  
11  
12  
13  
14  
15  
16  
17  
18  
19  
20  
21  
22  
23  
24  
25  
26  
27  
28  
29  
30  
31  
32  
33  
34  
35  
36  
37  
38  
39  
40  
41  
42  
43  
44  
45  
46  
47  
48  
49  
50  
51  
52  
53  
54  
55  
56  
57  
58  
59  
60

higher risk of impaired mental health status and susceptible of benefitting from an intervention. A worse symptoms score was associated with the presence of symptoms compatible with Covid-19 or having used all the healthcare resources put in place.

However, as a real intervention based on these assumptions would be very costly and logistically difficult, confirmed Covid-19 patients might instead be a better target group for an intervention.

Being female, young, and having unstable work or income have been shown to be significant correlators of psychological negative impact [18–21]. Women are especially vulnerable as they bear the heavier burden of childcare and care of the elderly, suffer gender-based violence and have more precarious jobs [22]. Crises exacerbate gender inequalities, including gender-based violence, increased care burden, inadequate access to health services and others [23][24][25]. Moreover, women account for the majority of HCWs around the world, and those younger or with a childcare burden suffered psychological distress [26,27]. In our setting, it was mostly women who were responsible for caring for others, and caregiver adults with a higher perception of the difficulty of quarantine for children and the whole family suffered more psychological distress than the other groups. Individual perception has previously been associated with stress levels and a negative behavioural and emotional impact on children, and it has been hypothesized that one of the causes could be the impact of the situation itself on both adults and their children (indirectly [28] and directly [29]), along with the effects of school closures and the need to work from home with a lot of new inputs. Schools provide both education and counselling and promote and imply healthy habits that might not be continued at home [29].

Given their frailty and increased risk of suffering Covid-19 if living in nursing homes or similar facilities, people aged more than 60 years represent the vast majority of all Covid-

1  
2  
3 19-related deaths worldwide [30]. The elderly are key in Mediterranean countries, such  
4  
5 2 as ours, as they often take care of grandchildren when their parents go to work, so to  
6  
7 quarantine and isolate them can be very disturbing for the whole of society. Moreover,  
8  
9  
10 4 Covid-19 and the consequences of isolating the elderly can be devastating, not only for  
11  
12 their mental health but also as it contributes to a greater risk of morbidity, which may be  
13  
14 6 even worse in the more disadvantaged populations [31,32]. Although anxiety, depression  
15  
16 and symptoms of avoidance coping have been reported for the elderly [33] [34], we found  
17  
18 8 that younger people coped worse with the mental burden due to the Covid-19 pandemic,  
19  
20 and the measures imposed to combat it, than older people. Older people have been shown  
21  
22  
23 10 to be more resilient than younger people in other outbreaks and major disasters [35], and  
24  
25 our results also support this by showing that older people were less afraid of dying than  
26  
27 12 younger ones. This could be due to the fact that the elderly have a greater sense of the  
28  
29 meaning of life and that they tend to perceive time as being finite, which determines their  
30  
31  
32 14 priorities in terms of goals and behaviours [36]. Young adults already face stressful life  
33  
34 changes, and the pandemic has worsened this, even though one in five young adults might  
35  
36 16 have been better off due to having been removed from external pressures, such as work  
37  
38 and education, and/or to having more time for close relationships [37]. Several factors  
39  
40 18 have been suggested to account for this worsening, including the perceived virus-related  
41  
42 health risk [37][38] and the decrease of physical and social activity due to lockdown and  
43  
44 20 other restriction measures decreed by governments [38,39]. A study in France after two  
45  
46 weeks of lockdown reported sleep problems and increased consumption of sleeping pills,  
47  
48 22 with both being more frequent in people aged less than 35 years compared to older people  
49  
50 [40]. Similarly, Shanahan et al. showed that a good group to be selected for intervention  
51  
52 24 could be females, migrants and young adults with higher pre-pandemic emotional  
53  
54 distress, including social exclusion [37].  
55  
56  
57  
58  
59  
60

1  
2  
3 A non-negligible proportion of our respondents were HCWs who, in Europe, are mostly  
4  
5 2 women [41]. In addition to their obviously increased risk of becoming infected [42], being  
6  
7 on the frontline against the SARS-CoV-2 pandemic may have put them under a great deal  
8  
9 of pressure, thus increasing levels of anxiety and chronic stress (due to the overwork and  
10  
11 4 of pressure, thus increasing levels of anxiety and chronic stress (due to the overwork and  
12  
13 suboptimal working conditions), which can last for to up to a year afterwards [11,43,44].  
14  
15 6 A study carried out in a cohort of 9138 HCWs showed that 45.7% were at risk of suffering  
16  
17 from a mental disorder [45], and another, which included 5450 HCWs, showed that 8.4%  
18  
19 8 had experienced suicidal ideation and behaviour [46]. In our study, being a HCW was  
20  
21 found to be a positive factor for impaired mental health, especially for those working with  
22  
23 Covid-19 patients and afraid of infecting others, which has proved to have an impact on  
24  
25 10 outcomes [47]. This becomes worse as the tension in health systems increases, as front-  
26  
27 line professionals work in a complex environment given the ethical challenges of Covid-  
28  
29 12 19, eliciting different dimensions concerning ethical dilemmas related to the situation  
30  
31 itself and the measures dictated by the Government [48]. The shortage of hospital beds  
32  
33 14 was an important problem as it contributed to the case fatality rate and implied a triage of  
34  
35 patients according to their likelihood of survival [49–51]. The management of end-of-life  
36  
37 16 situations was particularly worrying, as banning the support of relatives at the bedside  
38  
39 had a very disturbing impact on patients and their families, but also on HCW mental  
40  
41 health, workload, challenges and professional outcomes [52]. According to our results,  
42  
43 18 nearly 8 out of 10 HCWs declared that they were afraid of working with Covid patients,  
44  
45 especially given the risk of infecting others. Being obliged to work with lack of  
46  
47 20 appropriate, or sufficient, personal protective equipment was one of the most frequent  
48  
49 complaints of HCWs who shared their narratives on the ethical concerns they  
50  
51 22 experienced. This low sense of security had previously been pointed out in small HCW  
52  
53 cohorts elsewhere [53][54][55]. We found differences between women and men in terms  
54  
55  
56  
57  
58  
59  
60



1  
2  
3 of the fear of transmitting the infection to others, and this could be related to women's  
4  
5 2 jobs implying more exposure (as is the case for nurses, who in our cohort were mostly  
6  
7 women). Those working in essential services also had higher psychological distress and  
8  
9  
10 4 this could be for the same reason, namely the low sense of security plus the fear of being  
11  
12 at higher risk of contracting the disease.  
13

14 6 Around 6.27% of respondents declared that their fear was of making medical decisions  
15  
16 that represented an ethical problem for them, with this percentage being higher in younger  
17  
18 8 people. One in five of our HCWs declared that they had experienced ethical problems, a  
19  
20 value which is in line with other studies [52,56], with approximately half of these being  
21  
22 related to patient selection or patient triage protocols/therapeutic indications. In our  
23  
24 10 opinion, this fact should also be explored more thoroughly and actively followed up to  
25  
26 prevent health professionals from being put into similar situations in the future.  
27  
28  
29 12  
30

31  
32 Our findings could be used to design and implement interventions to increase the  
33  
34 14 resilience of the groups identified herein, as well as to prepare an appropriate  
35  
36 organizational response. In this sense, some authors have published specific strategies  
37  
38 that could be used to alleviate this suffering [52,57–62]. Some of the strategies at an  
39  
40 individual and organizational level that could be actively implemented in the vulnerable  
41  
42 18 populations identified are:  
43  
44  
45

- 46  
47 1) To identify individuals who may be more vulnerable to mental health difficulties  
48  
49 20 or are part of the populations identified as being more vulnerable within each  
50  
51 group/team/staff members, and to provide them with appropriate care.  
52
- 53  
54 22 2) To provide education on mental hygiene, self-reflection and emotion-focused  
55  
56 therapy using different tools (storytelling, music, meditation, etc.).  
57
- 58  
59 24 3) To train in building resilience and foster a culture of resilience.  
60



1  
2  
3  
4  
5  
6  
7  
8  
9  
10  
11  
12  
13  
14  
15  
16  
17  
18  
19  
20  
21  
22  
23  
24  
25  
26  
27  
28  
29  
30  
31  
32  
33  
34  
35  
36  
37  
38  
39  
40  
41  
42  
43  
44  
45  
46  
47  
48  
49  
50  
51  
52  
53  
54  
55  
56  
57  
58  
59  
60

- 4) To promote mental health services and make them accessible to all. To plan a structured schedule to communicate existing resilience measures and support the programs available and how to access them.
- 5) To draft and implement a systematic communication plan in order to provide timely, accurate, regular and evidence-based information on the situation and the response planned (including all scenarios). To perform training and inform about the tools available to ensure its implementation if they are involved in this response. This can be applied at all levels, including companies, health departments and hospitals, public health systems and at local and national government level.
- 6) To provide people with structured opportunities to debrief and talk after critical events, to hear about their real-time concerns, and to engage them in collaborative approaches to decision-making and problem-solving.

## 5. Conclusion

We identified seven populations as being vulnerable and therefore likely to benefit from an intervention in the face of potential future outbreaks or other major disasters. Our study should open the door to the design of coping measures and the elaboration of strategy proposals with the full participation of those institutional leaders who are in a position to adapt policy to the real needs of the people at organizational, governmental and public health service levels.

## 6. Registration

The study is registered in ClinicalTrials.gov under code NCT04378452.

## 7. Contributorship statement

MRS, CA, MV and CV made substantial contributions to the conception or design of the work. JF, JLR, JMM, LA, MRS, CA and CV made substantial contributions to data acquisition and analysis. MRS, CA, PJC, JAMM, MV, BA, JU and ASB made substantial contributions to data interpretation. MRS, CA and CV drafted the manuscript and all the other authors revised it critically for important intellectual content. All authors gave final approval of the version to be published.

## 8. Acknowledgements

We would like to thank all the people who kindly shared the survey questionnaire via social media and/or completed it. We would also like to thank Jérôme Nigou, Valeria Bergalli, Paolo Salieri, Chiara Bertoldini and Harvey Evans, who kindly volunteered to translate/edit the questionnaire and website information into French, Italian and English, and to Mr. Andrew Frankland for reviewing and editing the English grammar of the text.

## 9. Data sharing statement

The article was uploaded to medRxiv 2021.03.20.21254029. The complete dataset results generated are available at:  
[dataset] Cristina Vilaplana, Judith Farrés, José Luis Ruiz, José Manuel Mas, Maria-Rosa Sarrias, Carolina Armengol, Lilibeth Arias, Pere-Joan Cardona, José A Muñoz-Moreno, Miriam Vilaplana, Belén Arranz, Judith Usall, & Antoni Serrano-Blanco. (2021). COM-COVID project: results dataset. Zenodo repository. Version 1, March 20, 2021. <https://doi.org/10.5281/zenodo.4608502>

## 10. Patient Public Involvement

The study was rapidly designed in a week following suggestions from members of the public who contacted the authors to share their concerns, experience and priorities with

1  
2  
3 them, suggesting that the pandemic was impacting people's lives at several health  
4  
5 2 dimensions. Patients and public were involved in data collection as the survey was shared  
6  
7 in five different languages via social media using snowball sampling. A report was  
8  
9 generated based on the study, and its results were disseminated to the general public by  
10  
11 4 upload to the institutional websites and shared by email with a list of people who had  
12  
13 given specific consent to be notified of the results obtained. A press release was also  
14  
15 6 issued and the study and its results were discussed with key community members via  
16  
17 meetings and public debates.  
18  
19 8

## 10 **11. Funding**

11  
12 This work was supported by the Spanish Government-FEDER Funds through CV  
13  
14 [CPII18/00031], and funding from the European Union's Horizon 2020 research and  
15  
16 innovation programme under grant agreement No 847762 through an LAC contract.  
17  
18

## 14 **12. Conflicts of Interest**

15  
16 The salaries of JF, JLR and JMM are partially paid by the European Union's Horizon  
17  
18 2020 research and innovation program under grant agreement no. 847762.

19  
20 LA received support from the European Union's Horizon 2020 research and innovation  
21  
22 program under grant agreement no. 847762 through her contract.

23  
24 JAMM has a post-doctoral research contract from the Fundació Lluita contra la SIDA,  
25  
26 and has received honoraria for research/educational presentations by GILEAD Sciences  
27  
28 and MSD.

29  
30 MV is the president of the Suicidal Conduct Committee of PSSJD.

31  
32 ASB has received support from the Diputació de Barcelona via contracts or grants to carry  
33  
34 out seven projects on mental health planning; from the Spanish Government-FEDER  
35  
36 Funds through Instituto de Salud Carlos III (a grant to carry out a research project about  
37  
38 mental health (PI19/00111 and PI15/00519)), and from the Catalan Government via an  
39  
40  
41  
42  
43  
44  
45  
46  
47  
48  
49  
50  
51  
52  
53  
54  
55  
56  
57  
58  
59  
60

1 intensification research contract from the PERIS program (SLT006/17/68), 2018-2020.

- 2 He has acted as member of the Advisory Board of the Instituto de Salud Carlos III for the  
3 evaluation of research projects and as member of the Advisory Board of the Fundación  
4 Progreso y Salud for the evaluation of research projects.

5 CV received support from the Spanish Government-FEDER Funds through CIBER  
6 Enfermedades Respiratorias and her contract [CPII18/00031], from the European  
7 Union's Horizon 2020 research and innovation program for being the local PI of the  
8 Comix study (conducted within the EpiPose project (GA 101003688)), and has acted as  
9 an expert member of the Covid-19 crisis committee of the IGTP.

10 MRS, CA, PJC, BA and JU declare no competing interests.

### 12 **13. References**

- 14 1 Ministerio de Sanidad Servicios Sociales e Igualdad; Ministerio de Economía y  
15 Competitividad; Instituto de Salud Carlos III. Situación del COVID-19 en  
16 España. <https://covid19.isciii.es/>  
17  
18 2 Health Department of the Catalan Government (Institution). Comunicat del  
19 Departament de Salut, 30 de març de 2020.  
20 [https://govern.cat/salaprensa/notes-premsa/383715/comunicat-del-](https://govern.cat/salaprensa/notes-premsa/383715/comunicat-del-departament-salut)  
21 [departament-salut](https://govern.cat/salaprensa/notes-premsa/383715/comunicat-del-departament-salut)  
22  
23 3 European Centre for Disease Prevention and Control. Novel coronavirus disease  
24 2019 ( COVID-19 ) pandemic : increased transmission in the EU / EEA and the  
25 UK – sixth update. 2020.  
26 [https://www.ecdc.europa.eu/sites/default/files/documents/RRA-sixth-update-](https://www.ecdc.europa.eu/sites/default/files/documents/RRA-sixth-update-Outbreak-of-novel-coronavirus-disease-2019-COVID-19.pdf)  
27 [Outbreak-of-novel-coronavirus-disease-2019-COVID-19.pdf](https://www.ecdc.europa.eu/sites/default/files/documents/RRA-sixth-update-Outbreak-of-novel-coronavirus-disease-2019-COVID-19.pdf)  
28  
29 4 CDC. Patients with COVID-19. CDC website.

1  
2  
3  
4  
5  
6  
7  
8  
9  
10  
11  
12  
13  
14  
15  
16  
17  
18  
19  
20  
21  
22  
23  
24  
25  
26  
27  
28  
29  
30  
31  
32  
33  
34  
35  
36  
37  
38  
39  
40  
41  
42  
43  
44  
45  
46  
47  
48  
49  
50  
51  
52  
53  
54  
55  
56  
57  
58  
59  
60

2020.<https://www.cdc.gov/coronavirus/2019-ncov/hcp/disposition-hospitalized-patients.html> (accessed 20 Mar 2020).

2 5 Van Bortel T, Basnayake A, Wurie F, *et al.* Psychosocial effects of an Ebola outbreak at individual, community and international levels. *Bull World Health Organ* 2016;**94**:210–4. doi:10.2471/blt.15.158543

6 6 Rubin GJ, Wessely S. The psychological effects of quarantining a city. *BMJ* 2020;**368**:1–2. doi:10.1136/bmj.m313

8 7 Wang C, Pan R, Wan X, *et al.* Immediate psychological responses and associated factors during the initial stage of the 2019 coronavirus disease (COVID-19) epidemic among the general population in China. *Int J Environ Res Public Health* 2020;**17**. doi:10.3390/ijerph17051729

12 8 Sim K, Huak Chan Y, Chong PN, *et al.* Psychosocial and coping responses within the community health care setting towards a national outbreak of an infectious disease. *J Psychosom Res* 2010;**68**:195–202. doi:10.1016/j.jpsychores.2009.04.004

16 9 Brooks SK, Webster RK, Smith LE, *et al.* The psychological impact of quarantine and how to reduce it: rapid review of the evidence. *Lancet* 2020;**395**:912–20. doi:10.1016/S0140-6736(20)30460-8

10 10 Leung GM, Lam TH, Ho LM, *et al.* The impact of community psychological responses on outbreak control for severe acute respiratory syndrome in Hong Kong. *J Epidemiol Community Health* 2003;**57**:857–63. doi:10.1136/jech.57.11.857

11 24 McAlonan GM, Lee AM, Cheung V, *et al.* Immediate and sustained psychological impact of an emerging infectious disease outbreak on health care workers. *Can J Psychiatry* 2007;**52**:241–7. doi:10.1177/070674370705200406

- 1  
2  
3 12 Gibbons JD, Chakraborti S. *Nonparametric Statistical Inference*. 5th ed. Boca  
4  
5 2 Raton: : Chapman & Hall/CRC Press, Taylor & Francis Group 2011.  
6  
7 13 Hollander M, Wolfe D. *Nonparametric Statistical Methods, 2nd Edition*. 1999.  
8  
9  
10 4 14 INEbase / Demography and population /Population figures and Demographic  
11  
12 Censuses /Population figures / Latest data.  
13  
14 6 15 Marí-Dell'olmo M, Gotsens M, Pasarín MI, *et al*. Socioeconomic inequalities in  
15  
16 COVID-19 in a European urban area: Two waves, two patterns. *Int J Environ Res*  
17  
18 *Public Health* Published Online First: 2021. doi:10.3390/ijerph18031256  
19 8  
20  
21 16 González-Sanguino C, Ausín B, Castellanos MÁ, *et al*. Mental health  
22  
23 10 consequences during the initial stage of the 2020 Coronavirus pandemic  
24  
25 (COVID-19) in Spain. *Brain Behav Immun* Published Online First: 2020.  
26  
27 doi:10.1016/j.bbi.2020.05.040  
28 12  
29  
30 17 Wang C, Pan R, Wan X, *et al*. A longitudinal study on the mental health of  
31  
32 general population during the COVID-19 epidemic in China. *Brain Behav Immun*  
33 14  
34 Published Online First: 2020. doi:10.1016/j.bbi.2020.04.028  
35  
36  
37 16 18 Rodríguez-Rey R, Garrido-Hernansaiz H, Collado S. Psychological Impact and  
38  
39 Associated Factors During the Initial Stage of the Coronavirus (COVID-19)  
40  
41 Pandemic Among the General Population in Spain. *Front Psychol* Published  
42 18  
43 Online First: 2020. doi:10.3389/fpsyg.2020.01540  
44  
45  
46 20 19 Jacques-Avinõ C, López-Jiménez T, Medina-Perucha L, *et al*. Gender-based  
47  
48 approach on the social impact and mental health in Spain during COVID-19  
49  
50 lockdown: A cross-sectional study. *BMJ Open* Published Online First: 2020.  
51 22  
52 doi:10.1136/bmjopen-2020-044617  
53  
54  
55 24 20 Ramírez LPG, Arriaga RJM, Hernández-Gonzalez MA, *et al*. Psychological  
56  
57 distress and signs of post-traumatic stress in response to the COVID-19 health  
58  
59  
60

1  
2  
3  
4  
5  
6  
7  
8  
9  
10  
11  
12  
13  
14  
15  
16  
17  
18  
19  
20  
21  
22  
23  
24  
25  
26  
27  
28  
29  
30  
31  
32  
33  
34  
35  
36  
37  
38  
39  
40  
41  
42  
43  
44  
45  
46  
47  
48  
49  
50  
51  
52  
53  
54  
55  
56  
57  
58  
59  
60

emergency in a Mexican sample. *Psychol Res Behav Manag* Published Online

First: 2020. doi:10.2147/PRBM.S259563

21 Cao W, Fang Z, Hou G, *et al.* The psychological impact of the COVID-19

epidemic on college students in China. *Psychiatry Res* Published Online First:

2020. doi:10.1016/j.psychres.2020.112934

6 22 Walter LA, McGregor AJ. Sex- and Gender-specific Observations and

Implications for COVID-19. *West J Emerg Med* 2020;:507–9.

doi:10.5811/westjem.2020.4.47536

23 Peterman A, Potts A, Donnell MO, *et al.* Working Paper 528 April 2020

Pandemics and Violence Against Women and Children. *Cent Glob Dev* 2020;:43.

24 Davies SE, Bennett B. A gendered human rights analysis of Ebola and Zika:

12 Locating gender in global health emergencies. *Int Aff* Published Online First:

2016. doi:10.1111/1468-2346.12704

14 25 Mollona E, Aivazidou E, Barberio V, *et al.* A policy framework for tackling the  
economic and social impact of the COVID-19 crisis. 2019.

doi:10.6092/unibo/amsacta/6247

26 Kisely S, Warren N, McMahon L, *et al.* Occurrence, prevention, and

18 management of the psychological effects of emerging virus outbreaks on

healthcare workers: rapid review and meta-analysis. *BMJ* 2020;369.

doi:https://doi.org/10.1136/bmj.m1642

27 Davico C, Ghiggia A, Marcotulli D, *et al.* Psychological Impact of the COVID-

19 Pandemic on Adults and Their Children in Italy. *Front Psychiatry* 2021;12:1–

8. doi:10.3389/fpsyt.2021.572997

24 28 Spinelli M, Lionetti F, Pastore M, *et al.* Parents' Stress and Children's

Psychological Problems in Families Facing the COVID-19 Outbreak in Italy.

- 1  
2  
3 *Front Psychol* Published Online First: 2020. doi:10.3389/fpsyg.2020.01713  
4  
5 2 29 Wang G, Zhang Y, Zhao J, *et al.* Mitigate the effects of home lockdown on  
6 children during the COVID-19 outbreak. *Lancet* 2020;**395**:945–7.  
7  
8  
9  
10 4 doi:10.1016/S0140-6736(20)30547-X  
11  
12 30 Kang SJ, Jung SI. Age-Related Morbidity and Mortality among Patients with  
13 COVID-19. *Infect Chemother* Published Online First: 2020.  
14 6  
15  
16 doi:10.3947/ic.2020.52.2.154  
17  
18 8 31 Armitage R, Nellums LB. COVID-19 and the consequences of isolating the  
19 elderly. *Lancet Public Heal* 2020;**5**:e256. doi:10.1016/S2468-2667(20)30061-X  
20  
21  
22  
23 10 32 Petretto DR, Pili R. Ageing and COVID-19: What is the Role for Elderly People?  
24  
25  
26 *Geriatrics* 2020;**5**:25. doi:10.3390/geriatrics5020025  
27  
28 12 33 Meng H, Xu Y, Dai J, *et al.* Analyze the psychological impact of COVID-19  
29 among the elderly population in China and make corresponding suggestions.  
30  
31  
32  
33 14 Psychiatry Res. 2020. doi:10.1016/j.psychres.2020.112983  
34  
35 34 Bobes-Bascarán T, Sáiz PA, Velasco A, *et al.* Early psychological correlates  
36 associated with COVID-19 in a Spanish older adult sample. *Am J Geriatr*  
37 16  
38  
39 *Psychiatry* 2020;:1–12. doi:https://doi.org/10.1016/j.jagp.2020.09.005  
40  
41  
42 18 35 Cohen O, Geva D, Lahad M, *et al.* Community Resilience throughout the  
43 Lifespan the Potential Contribution of Healthy Elders. *PLoS One* 2016;**11**:1–14.  
44  
45  
46  
47 20 doi:10.1371/journal.pone.0148125  
48  
49 36 Fernández-Aguilar L, Ricarte J, Ros L, *et al.* Emotional differences in young and  
50  
51  
52 22 older adults: Films as mood induction procedure. *Front Psychol* Published  
53  
54 Online First: 2018. doi:10.3389/fpsyg.2018.01110  
55  
56 24 37 Shanahan L, Steinhoff A, Bechtiger L, *et al.* Emotional Distress in Young Adults  
57  
58 During the COVID-19 Pandemic: Evidence of Risk and Resilience From a  
59  
60



1  
2  
3  
4  
5  
6  
7  
8  
9  
10  
11  
12  
13  
14  
15  
16  
17  
18  
19  
20  
21  
22  
23  
24  
25  
26  
27  
28  
29  
30  
31  
32  
33  
34  
35  
36  
37  
38  
39  
40  
41  
42  
43  
44  
45  
46  
47  
48  
49  
50  
51  
52  
53  
54  
55  
56  
57  
58  
59  
60

Longitudinal Cohort Study. *Psychol Med* Published Online First: 2020.

doi:10.1017/s003329172000241x

38 Commodari E, La Rosa VL. Adolescents in quarantine during COVID-19  
4 pandemic in Italy: Perceived health risk, beliefs, psychological experiences and  
expectations for the future. *Front Psychol* 2020;**11**:2480.

doi:10.3389/FPSYG.2020.559951

39 Maugeri G, Castrogiovanni P, Battaglia G, *et al.* The impact of physical activity  
8 on psychological health during Covid-19 pandemic in Italy. *Heliyon* Published  
Online First: 2020. doi:10.1016/j.heliyon.2020.e04315

10 40 Beck F, Léger D, Fressard L, *et al.* Covid-19 health crisis and lockdown  
associated with high level of sleep complaints and hypnotic uptake at the  
12 population level. *J. Sleep Res.* 2020. doi:10.1111/jsr.13119

41 Rossi R, Socci V, Pacitti F, *et al.* Mental Health Outcomes Among Frontline and  
14 Second-Line Health Care Workers During the Coronavirus Disease 2019  
(COVID-19) Pandemic in Italy. *JAMA Netw open* 2020;**3**:e2010185.

doi:10.1001/jamanetworkopen.2020.10185

42 Xiao J, Fang M, Chen Q, *et al.* SARS, MERS and COVID-19 among healthcare  
18 workers: A narrative review. *J Infect Public Health* 2020;**13**:843–8.

doi:10.1016/j.jiph.2020.05.019

20 43 Simione L, Gnagnarella C. Differences Between Health Workers and General  
Population in Risk Perception, Behaviors, and Psychological Distress Related to  
51 COVID-19 Spread in Italy. *Front Psychol* 2020;**11**.

doi:10.3389/fpsyg.2020.02166

24 44 Pappa S, Ntella V, Giannakas T, *et al.* Prevalence of depression, anxiety, and  
insomnia among healthcare workers during the COVID-19 pandemic: A

- 1  
2  
3 systematic review and meta-analysis. *Brain. Behav. Immun.* 2020.  
4  
5  
6 2 doi:10.1016/j.bbi.2020.05.026  
7  
8 45 Alonso J, Vilagut G, Mortier P, *et al.* Mental health impact of the first wave of  
9  
10 4 COVID-19 pandemic on Spanish healthcare workers: A large cross-sectional  
11  
12 survey. *Rev Psiquiatr Salud Ment* Published Online First: 2021.  
13  
14 6 doi:10.1016/j.rpsm.2020.12.001  
15  
16 46 Mortier P, Vilagut G, Ferrer M, *et al.* Thirty-day suicidal thoughts and behaviors  
17  
18 8 among hospital workers during the first wave of the Spain COVID-19 outbreak.  
19  
20 *Depress Anxiety* Published Online First: 2021. doi:10.1002/da.23129  
21  
22  
23 10 47 Ramaci T, Barattucci M, Ledda C, *et al.* Social stigma during COVID-19 and its  
24  
25 impact on HCWs outcomes. *Sustain* Published Online First: 2020.  
26  
27 12 doi:10.3390/su12093834  
28  
29 48 Robert R, Kentish-Barnes N, Boyer A, *et al.* Ethical dilemmas due to the Covid-  
30  
31 14 19 pandemic. *Ann. Intensive Care.* 2020. doi:10.1186/s13613-020-00702-7  
32  
33 49 Zanin M, Xiao C, Liang T, *et al.* The public health response to the COVID-19  
34  
35 outbreak in mainland China: a narrative review. *J Thorac Dis* Published Online  
36  
37 16 First: 2020. doi:10.21037/jtd-20-2363  
38  
39  
40 18 50 Verweij M, van de Vathorst S, Schermer M, *et al.* Ethical Advice for an Intensive  
41  
42 Care Triage Protocol in the COVID-19 Pandemic: Lessons Learned from The  
43  
44 20 Netherlands. *Public Health Ethics* Published Online First: 2020.  
45  
46 doi:10.1093/phe/phaa027  
47  
48  
49 22 51 Vincent JL, Creteur J. Ethical aspects of the COVID-19 crisis: How to deal with  
50  
51 an overwhelming shortage of acute beds. *Eur Hear journal Acute Cardiovasc*  
52  
53 *care* Published Online First: 2020. doi:10.1177/2048872620922788  
54  
55 24  
56  
57 52 Owens IT. Supporting nurses' mental health during the pandemic. *Nursing*  
58  
59  
60

1  
2  
3  
4  
5  
6  
7  
8  
9  
10  
11  
12  
13  
14  
15  
16  
17  
18  
19  
20  
21  
22  
23  
24  
25  
26  
27  
28  
29  
30  
31  
32  
33  
34  
35  
36  
37  
38  
39  
40  
41  
42  
43  
44  
45  
46  
47  
48  
49  
50  
51  
52  
53  
54  
55  
56  
57  
58  
59  
60

(Lond) 2020;**50**:54–7. doi:10.1097/01.NURSE.0000697156.46992.b2

- 2 53 Martínez-López JÁ, Lázaro-Pérez C, Gómez-Galán J, *et al.* Psychological Impact of COVID-19 Emergency on Health Professionals: Burnout Incidence at the Most Critical Period in Spain. *J Clin Med* Published Online First: 2020. doi:10.3390/jcm9093029
- 4 54 Nowicki GJ, Ślusarska B, Tucholska K, *et al.* The severity of traumatic stress associated with covid-19 pandemic, perception of support, sense of security, and sense of meaning in life among nurses: Research protocol and preliminary results from poland. *Int J Environ Res Public Health* Published Online First: 2020. doi:10.3390/ijerph17186491
- 6 55 Delgado D, Quintana FW, Perez G, *et al.* Personal safety during the covid-19 pandemic: Realities and perspectives of healthcare workers in latin America. *Int J Environ Res Public Health* Published Online First: 2020. doi:10.3390/ijerph17082798
- 8 56 Epstein EG, Delgado S. Understanding and addressing moral distress. *Online J Issues Nurs* Published Online First: 2010. doi:10.3912/OJIN.Vol15No03Man01
- 10 57 Tomlin J, Dalglish-Warburton B, Lamph G. Psychosocial Support for Healthcare Workers During the COVID-19 Pandemic. *Front Psychol* Published Online First: 2020. doi:10.3389/fpsyg.2020.01960
- 12 58 Maves RC, Downar J, Dichter JR, *et al.* Triage of Scarce Critical Care Resources in COVID-19 An Implementation Guide for Regional Allocation: An Expert Panel Report of the Task Force for Mass Critical Care and the American College of Chest Physicians. *Chest*. 2020. doi:10.1016/j.chest.2020.03.063
- 14 59 Johns Hopkins Berman Institute of Bioethics. Resources for Frontline Clinicians. 2020.

- 1  
2  
3 60 Chmitorz A, Kunzler A, Helmreich I, *et al.* Intervention studies to foster  
4  
5 2 resilience – A systematic review and proposal for a resilience framework in  
6  
7 future intervention studies. *Clin Psychol Rev* 2018;**59**:78–100.  
8  
9  
10 4 doi:10.1016/j.cpr.2017.11.002  
11  
12 61 Norris FH, Stevens SP, Pfefferbaum B, *et al.* Community resilience as a  
13  
14 6 metaphor, theory, set of capacities, and strategy for disaster readiness. *Am J*  
15  
16 *Community Psychol* 2008;**41**:127–50. doi:10.1007/s10464-007-9156-6  
17  
18  
19 8 62 Ye J. Pediatric mental and behavioral health in the period of quarantine and  
20  
21 social distancing with COVID-19. *JMIR Pediatr Parent* 2020;**3**.  
22  
23 10 doi:10.2196/19867  
24  
25  
26  
27  
28  
29 12  
30  
31 **14. Tables**  
32  
33 14  
34  
35  
36  
37  
38  
39  
40  
41  
42  
43  
44  
45  
46  
47  
48  
49  
50  
51  
52  
53  
54  
55  
56  
57  
58  
59  
60

**Table 1: Characteristics of the cohort.** Number of cases (number of responses received per answer category) and percentage of the total responses obtained for each question. Please note that some of the questions were multiple choice.

| ANSWER CATEGORIES               |                        | No. CASES | TOTAL % | ANSWER CATEGORIES                             |                | No. CASES | TOTAL % |
|---------------------------------|------------------------|-----------|---------|-----------------------------------------------|----------------|-----------|---------|
| <b>Gender</b>                   | Female                 | 39,943    | 70.5    | <b>Care of someone</b>                        | No             | 24,755    | 39.75   |
|                                 | Male                   | 16,556    | 29.22   |                                               | Yes, <16 years | 15,452    | 24.81   |
|                                 | Non binary             | 88        | 0.15    |                                               | Yes, >16 years | 7624      | 12.24   |
|                                 | Not saying             | 69        | 0.12    |                                               | Yes, siblings  | 782       | 1.26    |
| <b>Origin</b>                   | Catalonia region       | 54,318    | 95.63   | <b>Burden of care (in n options selected)</b> | Yes, parents   | 9409      | 15.11   |
|                                 | Other                  | 2480      | 4.37    |                                               | Yes, others    | 4248      | 6.82    |
| <b>Civil status</b>             | Married                | 30,389    | 53.65   | <b>People providing financially at home</b>   | none           | 24,814    | 43.80   |
|                                 | Divorced               | 6030      | 10.64   |                                               | 1              | 14,055    | 24.81   |
|                                 | In couple              | 10,305    | 18.19   |                                               | 2              | 15,070    | 26.60   |
|                                 | Single                 | 7990      | 14.1    |                                               | 3              | 2473      | 4.36    |
|                                 | Widow                  | 1929      | 3.4     |                                               | 4              | 217       | 0.38    |
| <b>Housing</b>                  | Owned apartment/house  | 51,428    | 90.95   | <b>Savings</b>                                | 5              | 20        | 0.03    |
|                                 | Shared apartment/house | 4417      | 7.81    |                                               | >2             | 4379      | 7.77    |
|                                 | Rented room            | 607       | 1.07    |                                               | 2              | 37,677    | 66.9    |
|                                 | Centre/institution     | 71        | 0.12    |                                               | 1              | 14,256    | 25.31   |
|                                 | Homeless               | 18        | 0.03    |                                               | No             | 11,685    | 20.67   |
| <b>Maximum Education Degree</b> | Primary Education      | 2182      | 3.85    | <b>Mortgage to pay</b>                        | Yes            | 20,201    | 35.73   |
|                                 | Secondary Education    | 3093      | 5.46    |                                               | Some           | 24,637    | 43.58   |
|                                 | High School            | 17,853    | 31.53   | No                                            | 33,374         | 59.01     |         |

|                   |                   |        |       |                                                  |        |       |
|-------------------|-------------------|--------|-------|--------------------------------------------------|--------|-------|
|                   | Degree            | 24,130 | 42.62 | Yes, one                                         | 20,141 | 35.61 |
|                   | Master            | 7528   | 13.29 | Yes, more than one                               | 3041   | 5.37  |
|                   | PhD               | 1829   | 3.23  | No                                               | 42,899 | 75.83 |
|                   | Qualified job     | 20,449 | 36.13 | Yes                                              | 13,669 | 24.16 |
|                   | Non-qualified job | 2037   | 3.59  | Nurse                                            | 1567   | 30.63 |
|                   | Job in Healthcare | 5132   | 9.06  | Physician                                        | 1110   | 21.70 |
|                   | Home/people care  | 2731   | 4.82  | Others (including working in a private pharmacy) | 659    | 12.88 |
| <b>Employment</b> | Self-employed     | 5110   | 9.02  | Technician                                       | 588    | 11.49 |
|                   | Company owner     | 2417   | 4.27  | Administrative staff                             | 511    | 9.99  |
|                   | Unemployed        | 2883   | 5.09  | Nurse assistant                                  | 491    | 9.59  |
|                   | Other             | 15,832 | 27.97 | Researcher                                       | 129    | 2.52  |
|                   |                   |        |       | Caretaker                                        | 28     | 0.54  |
|                   |                   |        |       | Cleaning staff                                   | 15     | 0.29  |
|                   |                   |        |       | Catering staff                                   | 13     | 0.25  |
|                   |                   |        |       | Laundry personnel                                | 4      | 0.07  |

**Rent to pay****Occupation of HCW**

**Table 2: Impact of the pandemic on the general population.** Number of cases (number of responses received per answer category) and percentage of the total responses obtained for each question. Please note that some of the questions were multiple choice. \*For the number of symptoms only answers up to 4 are presented, even if the percentage given was calculated for all the responses obtained.

|                                                         | ANSWER CATEGORIES                                              | No. CASES | TOTAL % |
|---------------------------------------------------------|----------------------------------------------------------------|-----------|---------|
| <b>Loss of job</b>                                      | No                                                             | 42,475    | 75.12   |
|                                                         | Yes, the company made a labour force adjustment plan           | 103       | 0.18    |
|                                                         | Yes, the company made a temporary labour force adjustment plan | 5530      | 9.78    |
|                                                         | Yes, I have lost some previously contracted/arranged jobs      | 3252      | 5.75    |
|                                                         | Yes, I was fired                                               | 499       | 0.88    |
|                                                         | Yes, others                                                    | 4687      | 8.29    |
|                                                         | <b>Spending less</b>                                           | Yes       | 34,307  |
| A little                                                |                                                                | 12,493    | 22.09   |
| No                                                      |                                                                | 9747      | 17.23   |
| <b>Sought social assistance/or any other assistance</b> | No                                                             | 51,588    | 91.00   |
|                                                         | Not yet, but will need to                                      | 2756      | 5.00    |
|                                                         | Yes                                                            | 2208      | 4.00    |
| <b>Contact with someone infected by SARS-CoV-2</b>      | I do not know                                                  | 45,86     | 80.15   |
|                                                         | yes, with a probable non-confirmed case                        | 5627      | 9.83    |
|                                                         | Yes, with a confirmed case                                     | 5730      | 10.01   |
| <b>Presence of symptoms (since February)</b>            | No                                                             | 26,598    | 26.18   |
|                                                         | Headache                                                       | 16,268    | 16.01   |
|                                                         | Sore throat                                                    | 10,013    | 9.85    |
|                                                         | Nasal congestion/runny nose                                    | 9322      | 9.17    |
|                                                         | Extreme fatigue/tiredness                                      | 7029      | 6.91    |
|                                                         | Persistent cough (for one week or more)                        | 6957      | 6.84    |
|                                                         | Muscle pain                                                    | 6299      | 6.20    |
|                                                         | Diarrhea                                                       | 5453      | 5.36    |
|                                                         | Dizziness                                                      | 2897      | 2.85    |
|                                                         | Shortness of breath                                            | 2231      | 2.19    |
|                                                         | Chest pain                                                     | 1935      | 1.90    |
| Loss of smell, smell blindness                          | 1894                                                           | 1.86      |         |
| Persistent fever (for one week or more)                 | 1663                                                           | 1.63      |         |

|                                                                                         |                                                                         |        |       |
|-----------------------------------------------------------------------------------------|-------------------------------------------------------------------------|--------|-------|
|                                                                                         | Loss of appetite/weight                                                 | 1333   | 1.31  |
|                                                                                         | Loss of taste                                                           | 1689   | 1.66  |
| <b>No. of symptoms*</b>                                                                 | 1                                                                       | 11,899 | 40.03 |
|                                                                                         | 2                                                                       | 7062   | 23.76 |
|                                                                                         | 3                                                                       | 4365   | 14.68 |
|                                                                                         | 4                                                                       | 2481   | 8.34  |
| <b>How did they feel when answering the questionnaire</b>                               | Well                                                                    | 37,599 | 66.50 |
|                                                                                         | Normal                                                                  | 12,726 | 22.50 |
|                                                                                         | Not at 100%                                                             | 6010   | 10.60 |
|                                                                                         | Bad                                                                     | 235    | 0.42  |
| <b>Use of healthcare resources put in place in the context of the COVID-19 pandemic</b> | None                                                                    | 38,955 | 64.25 |
|                                                                                         | Have used an app set up for management of COVID cases                   | 13,044 | 21.51 |
|                                                                                         | Have called a telephone number set up for the management of COVID cases | 3,399  | 5.60  |
|                                                                                         | Have been to a public healthcare center (including GP)                  | 2286   | 3.77  |
|                                                                                         | Have been tested                                                        | 1108   | 1.82  |
|                                                                                         | Have been to private doctor/healthcare center                           | 973    | 1.60  |
| <b>For those tested, result of the test</b>                                             | Negative                                                                | 621    | 57.76 |
|                                                                                         | Positive                                                                | 454    | 42.23 |

2

only



**Table 3: Impact of the pandemic on the general population (continuation).** Number of cases (number of responses received per answer category) and percentage of the total responses obtained for each question. Please note that some of the questions were multiple choice.

|                                                    |                                    | No. CASES | TOTAL % |
|----------------------------------------------------|------------------------------------|-----------|---------|
| <b>Staying home</b>                                | No, I am forced to go to work      | 228       | 0.40    |
|                                                    | No, I need to work                 | 534       | 0.94    |
|                                                    | No, I work in an essential service | 7549      | 13.32   |
|                                                    | Yes                                | 31,272    | 55.19   |
|                                                    | Yes, teleworking                   | 17,073    | 30.13   |
| <b>Afraid</b>                                      | No                                 | 14,021    | 26.86   |
|                                                    | Yes, going shopping                | 9029      | 17.30   |
|                                                    | Yes, to infect others              | 11,545    | 22.12   |
|                                                    | Yes, to get infected               | 17,59     | 33.70   |
|                                                    | <b>Afraid to infect</b>            | Elderly   | 4128    |
| Anyone                                             |                                    | 5689      | 49.28   |
| Children                                           |                                    | 1524      | 13.20   |
| Colleagues at work                                 |                                    | 201       | 1.74    |
| <b>Increased substance use</b>                     | No                                 | 36,521    | 57.94   |
|                                                    | Yes, alcohol                       | 3736      | 5.92    |
|                                                    | Yes, food                          | 15,292    | 24.26   |
|                                                    | Yes, illegal drugs                 | 257       | 0.40    |
|                                                    | Yes, drugs to calm down            | 2617      | 4.15    |
|                                                    | Yes, tobacco                       | 4599      | 7.29    |
| <b>Media to get information about the pandemic</b> | Social media                       | 35,08     | 29.23   |
|                                                    | TV                                 | 44,126    | 36.77   |
|                                                    | Radio                              | 18,543    | 15.45   |
|                                                    | Newspapers                         | 16,255    | 13.54   |
|                                                    | Other                              | 5991      | 4.99    |
| <b>Thoughts about the information received</b>     | It's ok                            | 14,193    | 18.98   |
|                                                    | The Government explains too much   | 2417      | 3.23    |
|                                                    | The Government explains too little | 6678      | 8.93    |
|                                                    | Media explain too much             | 9556      | 12.78   |
|                                                    | Media explain too little           | 2177      | 2.91    |

|                                                      |                                        |            |            |            |
|------------------------------------------------------|----------------------------------------|------------|------------|------------|
|                                                      | Too negative                           | 15,645     | 20.92      |            |
|                                                      | Poorly adjusted to reality             | 4049       | 26.82      |            |
|                                                      | No opinion                             | 20,053     | 5.41       |            |
|                                                      | No                                     | 14,575     | 21.43      |            |
| <b>Impact of the pandemic on people (subjective)</b> | Yes, my personality                    | 3252       | 4.78       |            |
|                                                      | Yes, my vision of society/ how we live | 34,274     | 50.41      |            |
|                                                      | Yes, my life                           | 15,889     | 23.36      |            |
|                                                      | <b>Score</b>                           | <b>50%</b> | <b>90%</b> | <b>95%</b> |
| <b>Scores results per percentile</b>                 | Anxiety                                | 2          | ≥10        | ≥16        |
|                                                      | Stress                                 | 8          | ≥24        | ≥28        |
|                                                      | Depression                             | 4          | ≥16        | ≥20        |
|                                                      | PTSD                                   | 17         | ≥46        | ≥54        |

2

**Table 4: Impact of the pandemic on HCWs.** Number of cases (number of responses received per answer category) and percentage of all responses obtained for each question.

Please note that some of the questions were multiple choice.

| ANSWER CATEGORIES                                    |                                                                                                                                        | No. CASES | TOTAL % | ANSWER CATEGORIES                                          |                                                                                                       | No. CASES | TOTAL % |
|------------------------------------------------------|----------------------------------------------------------------------------------------------------------------------------------------|-----------|---------|------------------------------------------------------------|-------------------------------------------------------------------------------------------------------|-----------|---------|
| <b>Having worked directly with COVID-19 patients</b> | No                                                                                                                                     | 2939      | 58.34   | No                                                         |                                                                                                       | 2817      | 56.29   |
|                                                      | Yes                                                                                                                                    | 2098      | 41.65   | No, I follow protocols                                     |                                                                                                       | 1256      | 25.09   |
| <b>Fear of working with COVID-19 patients</b>        | No                                                                                                                                     | 1122      | 24.13   | <b>Ethical concerns</b>                                    | Yes, with selection of patients and/or protocols for selection of patients or therapeutic indications | 473       | 9.41    |
|                                                      | Yes                                                                                                                                    | 3528      | 75.87   |                                                            | Yes, others                                                                                           | 460       | 9.19    |
|                                                      | No fear                                                                                                                                | 1122      | 14.58   |                                                            | Having worked without sufficient protection                                                           | 112       | 25.68   |
|                                                      | Scared of transmitting the virus to other non-COVID patients                                                                           | 1150      | 14.95   |                                                            | With patient triage or protocols for patient triage or therapeutic indication                         | 71        | 16.28   |
| <b>Fear of working with COVID-19 patients</b>        | Scared of transmitting the virus to own family, colleagues, etc.                                                                       | 3300      | 42.90   | <b>Problems faced by healthcare professionals, grouped</b> | With the protocol for case management.                                                                | 51        | 11.46   |
|                                                      | Scared of being obliged to take medical decisions representing an ethical dilemma for me (patient selection, application of protocols) | 482       | 6.26    |                                                            | With the protocol for End-of-Life management                                                          | 39        | 8.94    |
|                                                      | Scared of being infected                                                                                                               | 1309      | 17.01   |                                                            | With institution management or orders from superiors.                                                 | 35        | 8.02    |

1  
2  
3  
4  
5  
6  
7  
8  
9  
10  
11  
12  
13  
14  
15  
16  
17  
18  
19  
20  
21  
22  
23  
24  
25  
26  
27  
28  
29  
30  
31  
32  
33  
34  
35  
36  
37  
38  
39  
40  
41  
42  
43  
44  
45  
46  
47  
48  
49  
50  
51  
52  
53  
54  
55  
56  
57  
58  
59  
60

Afraid of dying 329 4.27

|                                                                                                                           |    |      |
|---------------------------------------------------------------------------------------------------------------------------|----|------|
| With the disjunctive of having to/wanting to go to work in the first line and not being able/wanting to do it.            | 30 | 6.88 |
| With the prioritization of dispensing protective material (face masks, EPIs) or tests.                                    | 23 | 5.27 |
| With the impact of the outbreak and/or lockdown on some populations (chronic or mental-health patients, elderly, etc.)    | 17 | 3.89 |
| Others (non-specified)                                                                                                    | 17 | 3.89 |
| With problems due to organizational changes.                                                                              | 16 | 3.66 |
| With management of information given to patients/their families, and related problems (including confidentiality issues). | 15 | 3.44 |
| With colleagues' attitudes                                                                                                | 11 | 2.52 |

2

Review only

**Table 5: Conditions statistically associated with the mental-health score results.**

| Factors:                                                                                                                         | Statistically associated with: |               |              |            |                 |                 |                    |
|----------------------------------------------------------------------------------------------------------------------------------|--------------------------------|---------------|--------------|------------|-----------------|-----------------|--------------------|
|                                                                                                                                  | Depression Index               | Anxiety Index | Stress Index | PTSD Index | Evitation Index | Intrusion Index | Hyperarousal Index |
| Risk                                                                                                                             | p                              | p             | p            | p          | p               | p               | p                  |
| Women                                                                                                                            | 0.019                          | 0.003         |              | 0.000      | 0.007           | 0.034           | 0.027              |
| <42 years                                                                                                                        |                                | 0.008         |              |            |                 |                 |                    |
| Caregivers                                                                                                                       |                                | 0.002         | 0.039        | 0.006      |                 | 0.050           |                    |
| Adults with higher perception of the difficulty of quarantine for children and the whole family (score on a 10-point scale) vs 0 |                                |               |              | 0.041      |                 | 0.032           | 0.022              |
| Living in a middle-high density population town                                                                                  |                                | 0.031         |              |            |                 |                 |                    |
| Living in a shared apartment/house                                                                                               |                                | 0.006         |              |            |                 |                 |                    |
| Living in a rented room                                                                                                          |                                | 0.039         |              |            |                 |                 |                    |
| Declaring to be homeless                                                                                                         |                                |               |              | 0.044      |                 |                 |                    |
| High deprivation index (>10)                                                                                                     |                                | 0.015         |              |            |                 |                 |                    |
| Going to work because job in essential services                                                                                  |                                | 0.011         |              |            |                 |                 |                    |
| Being a healthcare worker and being afraid of attending COVID-19 patients                                                        | 0.017                          |               |              |            | 0.023           |                 |                    |
| Having been in contact with a COVID-19 patient                                                                                   |                                | 0.006         |              | 0.038      |                 |                 |                    |
| Having had symptoms compatible with COVID-19                                                                                     | 0.021                          | 0.002         |              | 0.008      |                 |                 |                    |
| Having used all healthcare resources put in place in the context of the COVID-19 pandemic                                        |                                |               | 0.039        | 0.008      | 0.007           |                 | 0.011              |
| Afraid (of getting infected, infecting others, going shopping)                                                                   |                                | 0.000         | 0.036        | 0.000      | 0.003           | 0.012           | 0.006              |
| Having increased consumption of at least one substance                                                                           |                                | 0.006         |              | 0.008      |                 |                 |                    |

Using three media to get  
information about COVID-  
19

0.033

| <b>Protection</b>      | <b>p</b> |
|------------------------|----------|----------|----------|----------|----------|----------|----------|
| >61 years              |          | 0.006    |          | 0.05     |          |          |          |
| Being married          |          | 0.007    |          |          |          |          |          |
| Being a widow          |          |          |          | 0.020    | 0.011    |          |          |
| Having a qualified job |          | 0.008    |          |          |          |          |          |
| Having a PhD           | 0.019    | 0.010    |          |          | 0.031    |          |          |
| Feeling well           |          | 0.045    |          | 0.037    |          |          |          |

2

| General demography                                                                                                                                       |                                                                                                                                                                                                                                                                                                                                                                         |
|----------------------------------------------------------------------------------------------------------------------------------------------------------|-------------------------------------------------------------------------------------------------------------------------------------------------------------------------------------------------------------------------------------------------------------------------------------------------------------------------------------------------------------------------|
| How old are you?                                                                                                                                         |                                                                                                                                                                                                                                                                                                                                                                         |
| Which gender do you identify with?                                                                                                                       | male, female, non binary, I prefer not to say                                                                                                                                                                                                                                                                                                                           |
| In which country do you live?                                                                                                                            |                                                                                                                                                                                                                                                                                                                                                                         |
| In which postal code do you live?                                                                                                                        |                                                                                                                                                                                                                                                                                                                                                                         |
| How would you define your civil status?                                                                                                                  | single, married, divorced, widow, in a couple                                                                                                                                                                                                                                                                                                                           |
| 1 Where do you live?                                                                                                                                     | my own house/apartment, shared house/apartment, in a rented room, institutionalized, I am homeless                                                                                                                                                                                                                                                                      |
| 2 What level of education do you have? (check the maximum obtained)                                                                                      | primary education, secondary education, further education, bachelor degree, masters degree, doctoral degree                                                                                                                                                                                                                                                             |
| 3 What is your job?                                                                                                                                      | skilled job, unskilled job, caring for others/home, I have a company, I am self-employed, I am a healthcare worker (or working in a healthcare setting, I am unemployed, others                                                                                                                                                                                         |
| 4 <b>Questions for the Scale of socio-economic precariousness</b>                                                                                        | For index scoring, sum of all points multiplied by 2.                                                                                                                                                                                                                                                                                                                   |
| 5 Who provides financially at home?                                                                                                                      | >2 of us = 0 p, 2 of us = 1 p, only me = 2p                                                                                                                                                                                                                                                                                                                             |
| 6 Have you lost your job due to the COVID-19 outbreak?                                                                                                   | no = 0 p; yes, the company made a temporary labour force adjustment plan = 1 p; yes, others = 1.5 p; yes, I was fired/the company made a labour force adjustment plan/ I have lost some jobs previously contracted/arranged = 2 p                                                                                                                                       |
| 7 Do you have savings?                                                                                                                                   | yes = 0 p, yes, some = 1 p, no = 2 p                                                                                                                                                                                                                                                                                                                                    |
| 8 Do you have a mortgage to pay?                                                                                                                         | no = 0 p; yes, one = 1 p; yes, more than 1 = 2 p                                                                                                                                                                                                                                                                                                                        |
| 9 Do you have rent to pay?                                                                                                                               | no = 0 p, yes = 2 p                                                                                                                                                                                                                                                                                                                                                     |
| 10 Are you spending less since the COVID-19 outbreak?                                                                                                    | no = 0 p; a little = 1 p; yes = 2 p                                                                                                                                                                                                                                                                                                                                     |
| 11 Have you asked for social assistance or for any other assistance due to the COVID-19 outbreak?                                                        | no = 0 p; no, but will have to = 1 p; yes = 2 p                                                                                                                                                                                                                                                                                                                         |
| 12 Do you have to take care of somebody? (multiple choice question)                                                                                      | no = 0 p; yes (any answer: children <16 y.o., >16 y.o, parents, siblings, others) = 1 p per positive answer.                                                                                                                                                                                                                                                            |
| 13 <b>Habits and COVID-19-related health status during confinement</b>                                                                                   |                                                                                                                                                                                                                                                                                                                                                                         |
| 14 If having children: In which grade do you think the confinement is being difficult for children (and therefore for the family)?                       | scale of potential answer, 0 being= not at all and 10= a lot                                                                                                                                                                                                                                                                                                            |
| 15 Are you staying at home, during this time?                                                                                                            | yes; yes, I am teleworking; no, I work in essential services; no, I need to work; no, my employer does not allow me to                                                                                                                                                                                                                                                  |
| 16 Are you scared or worried?                                                                                                                            | no; yes, of getting infected; yes, of going to the shops; yes, of infecting others; yes, that people close to me get infected                                                                                                                                                                                                                                           |
| 17 Who are you scared of infecting?                                                                                                                      | the children, my parents/close elderly people; my colleagues; anyone                                                                                                                                                                                                                                                                                                    |
| 18 Do you think you are consuming more since the outbreak began?                                                                                         | no; yes, I eat more; yes, I drink more (alcoholic drinks); yes, I smoke more; yes, I consume more illegal drugs; yes, I consume more drugs to calm myself down (sleeping pills, muscle relaxants, tranquilizers)                                                                                                                                                        |
| 19 Through which channel do you receive information about the outbreak?                                                                                  | TV; Radio; Newspaper; Social media (Whatsapp, Twitter, Telegram etc.); Other channels                                                                                                                                                                                                                                                                                   |
| 20 What do you think of the information you are receiving?                                                                                               | It's too much: I would like the Government to explain less; It's too much: I would like the media to explain less; It's too little: I would like the Government to explain more; It's too little: I would like the media to explain more; It's too negative/too sensationalist; I think it's poorly adjusted to reality; It's alright; I do not think anything about it |
| 21 Do you think this situation has changed you?                                                                                                          | no; yes, my life has changed; yes, my personality had changed; yes, the way I see society/the way we lived                                                                                                                                                                                                                                                              |
| 22 Have you been in contact with someone infected by SARS-CoV-2?                                                                                         | yes, with a confirmed case (test positive); yes, with a probable non-confirmed case (test negative or test not done); I do not know                                                                                                                                                                                                                                     |
| 23 Since February, have you had any of these symptoms?                                                                                                   | no; persistent cough (for one week or more); headache; persistent fever (for one week or more); extreme fatigue/tiredness; sore throat; muscle pain; loss of appetite/weight; loss of smell, smell blindness; loss of taste; diarrhea; dizziness; shortness of breath; chest pain; nasal congestion/running nose                                                        |
| 24 How do you feel now?                                                                                                                                  | well, normal, I do not feel at 100%, bad                                                                                                                                                                                                                                                                                                                                |
| 25 In the last 14 days, have you used any healthcare resources put in place for the COVID-19 pandemic?                                                   | have called a telephone number set up for the management of COVID cases; have gone to the emergency room; have used an app set up for management of COVID cases; have been to a public healthcare center (including GP); have been to private doctor/healthcare center; have been tested; none of the above                                                             |
| 26 If you were tested, what was the result?                                                                                                              | positive, negative                                                                                                                                                                                                                                                                                                                                                      |
| 27 <b>For HealthCare workers</b>                                                                                                                         |                                                                                                                                                                                                                                                                                                                                                                         |
| 28 What is your job?                                                                                                                                     | physician, nurse, nurse assistant, technician, caretaker, researcher, kitchen personnel, cleaning personnel, administrative personnel, others                                                                                                                                                                                                                           |
| 29 Have you been working with COVID patients directly?                                                                                                   | no; not as far as I know; yes, I have been/am in a COVID team; yes, on duty                                                                                                                                                                                                                                                                                             |
| 30 Are you scared of working with COVID patients?                                                                                                        | no; yes, o being infected; yes, of dying; yes, of transmitting the virus to other non-COVID patients; yes, of transmitting the virus to my people (family/colleagues); yes, of being obliged to take medical decisions representing an ethical dilemma for me (patient selection, application of protocols)                                                             |
| 31 Do you have ethical concerns while working?                                                                                                           | no; no, I think I need to follow the protocols; yes, with selection of patients and/or protocols for selection of patients or therapeutic indications; yes, others                                                                                                                                                                                                      |
| 32 <b>Questions related to mental-health</b>                                                                                                             | <b>Scoring</b>                                                                                                                                                                                                                                                                                                                                                          |
| 33 <b>Questions related to anxiety- How these sentences apply to you?</b>                                                                                | For each of the questions below: never = 0 p, sometimes = 1 p, often = 2 p, almost always = 3 p. For the index scoring, sum of all points multiplied by 2.                                                                                                                                                                                                              |
| 34 last week I was aware of dryness of my mouth                                                                                                          |                                                                                                                                                                                                                                                                                                                                                                         |
| 35 last week I experienced breathing difficulty (excessively rapid breathing, breathlessness in the absence of any physical exertion and absence of any) |                                                                                                                                                                                                                                                                                                                                                                         |
| 36 last week I experienced trembling (eg in the hands)                                                                                                   |                                                                                                                                                                                                                                                                                                                                                                         |
| 37 last week I was worried about situations in which I might panic and make a fool of myself                                                             |                                                                                                                                                                                                                                                                                                                                                                         |
| 38 last week I felt I was close to panic                                                                                                                 |                                                                                                                                                                                                                                                                                                                                                                         |
| 39 last week I was aware of the action of my heart in the absence of physical exertions (sense of heart rate increase, heart missing a beat)             |                                                                                                                                                                                                                                                                                                                                                                         |
| 40 last week I felt scared without any good reason                                                                                                       |                                                                                                                                                                                                                                                                                                                                                                         |
| 41 <b>Questions related to stress- How these sentences apply to you?</b>                                                                                 | For each of the questions below: never = 0 p, sometimes = 1 p, often = 2 p, almost always = 3 p. For the index scoring, sum of all points multiplied by 2.                                                                                                                                                                                                              |
| 42 last week I found it hard to wind down                                                                                                                |                                                                                                                                                                                                                                                                                                                                                                         |
| 43 last week I tended to over-react to situations                                                                                                        |                                                                                                                                                                                                                                                                                                                                                                         |
| 44 last week I felt that I was using a lot of nervous energy                                                                                             |                                                                                                                                                                                                                                                                                                                                                                         |
| 45 last week I found myself getting agitated                                                                                                             |                                                                                                                                                                                                                                                                                                                                                                         |
| 46 last week I found it difficult to relax                                                                                                               |                                                                                                                                                                                                                                                                                                                                                                         |
| 47 last week I was intolerant of anything that kept me from getting on with what I was doing                                                             |                                                                                                                                                                                                                                                                                                                                                                         |
| 48 last week I felt that I was rather touchy                                                                                                             |                                                                                                                                                                                                                                                                                                                                                                         |
| 49 <b>Questions related to depression- How these sentences apply to you?</b>                                                                             | For each of the questions below: never = 0 p, sometimes = 1 p, often = 2 p, almost always = 3 p. For the index scoring, sum of all points multiplied by 2.                                                                                                                                                                                                              |
| 50 last week I couldn't seem to experience any positive feeling at all                                                                                   |                                                                                                                                                                                                                                                                                                                                                                         |
| 51 last week I found it difficult to work up the initiative to do things                                                                                 |                                                                                                                                                                                                                                                                                                                                                                         |
| 52 last week I felt that I had nothing to look forward to                                                                                                |                                                                                                                                                                                                                                                                                                                                                                         |
| 53 last week I felt down-hearted and blue                                                                                                                |                                                                                                                                                                                                                                                                                                                                                                         |
| 54 last week I was unable to become enthusiastic about anything                                                                                          |                                                                                                                                                                                                                                                                                                                                                                         |
| 55 last week I felt that life was meaningless                                                                                                            |                                                                                                                                                                                                                                                                                                                                                                         |
| 56 <b>Questions related to PTSD symptoms- How these sentences apply to you?</b>                                                                          | For each of the questions below: 0= not at all, 1= a little bit, 2= moderately, 3= quite a bit, 4=extremely. For the index scoring, sum of all points multiplied by 2.                                                                                                                                                                                                  |
| 57 <b>Questions related to Intrusion symptoms</b>                                                                                                        |                                                                                                                                                                                                                                                                                                                                                                         |
| 58 last week any reminder brought back feelings about it                                                                                                 |                                                                                                                                                                                                                                                                                                                                                                         |
| 59 last week I had trouble staying asleep                                                                                                                |                                                                                                                                                                                                                                                                                                                                                                         |
| 60 last week other things kept making me think about it.                                                                                                 |                                                                                                                                                                                                                                                                                                                                                                         |
| 61 last week I thought about it when I didn't mean to                                                                                                    |                                                                                                                                                                                                                                                                                                                                                                         |
| 62 last week Pictures about it popped into my mind                                                                                                       |                                                                                                                                                                                                                                                                                                                                                                         |
| 63 last week I found myself acting or feeling like I was back at that time                                                                               |                                                                                                                                                                                                                                                                                                                                                                         |
| 64 last week I had waves of strong feelings about it                                                                                                     |                                                                                                                                                                                                                                                                                                                                                                         |
| 65 <b>Questions related to Avoidance symptoms</b>                                                                                                        |                                                                                                                                                                                                                                                                                                                                                                         |
| 66 last week I avoided letting myself get upset when I thought about it or was reminded of it                                                            |                                                                                                                                                                                                                                                                                                                                                                         |
| 67 last week I felt as if it hadn't happened or wasn't real                                                                                              |                                                                                                                                                                                                                                                                                                                                                                         |
| 68 last week I stayed away from reminders of it.                                                                                                         |                                                                                                                                                                                                                                                                                                                                                                         |
| 69 last week I thought about it when I didn't mean to                                                                                                    |                                                                                                                                                                                                                                                                                                                                                                         |
| 70 last week I was aware that I still had a lot of feelings about it, but I didn't deal with them                                                        |                                                                                                                                                                                                                                                                                                                                                                         |
| 71 last week My feelings about it were kind of numb                                                                                                      |                                                                                                                                                                                                                                                                                                                                                                         |
| 72 last week I tried to remove it from my memory                                                                                                         |                                                                                                                                                                                                                                                                                                                                                                         |
| 73 last week I tried not to talk about it                                                                                                                |                                                                                                                                                                                                                                                                                                                                                                         |
| 74 <b>Questions related to Hyperarousal symptoms</b>                                                                                                     |                                                                                                                                                                                                                                                                                                                                                                         |
| 75 last week I felt irritable and angry.                                                                                                                 |                                                                                                                                                                                                                                                                                                                                                                         |
| 76 last week I was jumpy and easily startled                                                                                                             |                                                                                                                                                                                                                                                                                                                                                                         |
| 77 last week I had trouble falling asleep                                                                                                                |                                                                                                                                                                                                                                                                                                                                                                         |
| 78 last week I had trouble concentrating                                                                                                                 |                                                                                                                                                                                                                                                                                                                                                                         |
| 79 last week I felt watchful and on-guard                                                                                                                |                                                                                                                                                                                                                                                                                                                                                                         |

|    | ANSWER CATEGORIES                                              | Conditional distributions given the responders gender (%) |       |                         |          | Conditional distributions given the responders age range (%) |          |               |       |
|----|----------------------------------------------------------------|-----------------------------------------------------------|-------|-------------------------|----------|--------------------------------------------------------------|----------|---------------|-------|
|    |                                                                | women                                                     | men   | BMJ Open (women vs men) | <42 y.o. | 42-52 y.o.                                                   | >52 y.o. | Page 42 of 42 |       |
| 1  | Married                                                        | 51.04                                                     | 60.21 | 14.77                   | 27.94    | 32.2                                                         | 56.74    | 61.12         | 63.22 |
|    | Divorced                                                       | 11.75                                                     | 7.94  | 5.68                    | 16.17    | 2.52                                                         | 11.33    | 15.14         | 13.08 |
|    | In couple                                                      | 18.40                                                     | 17.39 | 39.77                   | 23.52    | 38.02                                                        | 18.34    | 10.91         | 6.85  |
|    | Single                                                         | 14.51                                                     | 12.89 | 38.63                   | 30.88    | 27.15                                                        | 12.85    | 10.06         | 7.2   |
|    | Widow                                                          | 4.18                                                      | 1.54  | 1.13                    | 1.47     | 0.08                                                         | 0.71     | 2.75          | 9.63  |
| 2  | Owned apartment/house                                          | 91.08                                                     | 90.89 | 64.36                   | 72.46    | 79.44                                                        | 94.22    | 95.08         | 94.48 |
|    | Shared apartment/house                                         | 7.7                                                       | 7.9   | 26.43                   | 23.18    | 18.43                                                        | 4.9      | 4.11          | 4.33  |
|    | Rented room                                                    | 1.05                                                      | 1.07  | 8.04                    | 0.00     | 2.01                                                         | 0.81     | 0.67          | 0.83  |
|    | Centre/institution                                             | 0.13                                                      | 0.09  | 0.00                    | 0.00     | 0.05                                                         | 0.03     | 0.09          | 0.3   |
|    | Homeless                                                       | 0.02                                                      | 0.03  | 1.14                    | 4.34     | 0.05                                                         | 0.01     | 0.02          | 0.03  |
| 3  | Primary Education                                              | 3.52                                                      | 4.63  | 5.68                    | 5.79     | 1.53                                                         | 3.3      | 4.24          | 6.1   |
|    | Secondary Education                                            | 5.18                                                      | 6.17  | 3.4                     | 1.44     | 4.83                                                         | 4.49     | 5.19          | 7.19  |
|    | High School                                                    | 29.92                                                     | 35.46 | 29.54                   | 28.98    | 27.54                                                        | 30.98    | 34.17         | 33.11 |
|    | Degree                                                         | 44.99                                                     | 36.96 | 31.81                   | 33.33    | 38.72                                                        | 43.92    | 43.48         | 44.26 |
|    | Master                                                         | 13.47                                                     | 12.77 | 26.13                   | 21.73    | 24.32                                                        | 14.3     | 9.7           | 5.65  |
| 4  | PhD                                                            | 2.9                                                       | 3.98  | 3.4                     | 8.69     | 3.03                                                         | 2.99     | 3.2           | 3.67  |
|    | Qualified job                                                  | 36.95                                                     | 34.15 | 35.22                   | 37.68    | 48.19                                                        | 48.76    | 41.3          | 7.86  |
|    | Non qualified job                                              | 3.51                                                      | 3.78  | 9.09                    | 2.89     | 4.39                                                         | 4.46     | 4.49          | 1.15  |
|    | Job in Healthcare                                              | 10.9                                                      | 4.67  | 9.09                    | 1.44     | 12.16                                                        | 10.58    | 9.21          | 4.64  |
|    | Home/people care                                               | 6.24                                                      | 1.42  | 0.00                    | 2.89     | 0.94                                                         | 1.69     | 3.25          | 12.86 |
| 5  | Self-employed                                                  | 8.03                                                      | 11.41 | 9.09                    | 15.94    | 7.72                                                         | 11.45    | 11.4          | 5.59  |
|    | Company owner                                                  | 3.00                                                      | 7.36  | 1.13                    | 1.44     | 2.39                                                         | 5.66     | 5.9           | 3.05  |
|    | Unemployed                                                     | 5.29                                                      | 4.54  | 12.5                    | 11.59    | 7.63                                                         | 4.62     | 5.61          | 2.69  |
|    | Other                                                          | 26.03                                                     | 32.63 | 23.86                   | 26.08    | 16.54                                                        | 12.73    | 18.8          | 62.13 |
|    | >2                                                             | 8.03                                                      | 7.05  | 14.77                   | 16.41    | 13.59                                                        | 3.99     | 7.26          | 6.43  |
| 6  | >2                                                             | 66.29                                                     | 68.57 | 54.54                   | 55.22    | 70.39                                                        | 71.65    | 64.94         | 61.18 |
|    | 1                                                              | 25.67                                                     | 24.37 | 30.68                   | 28.35    | 16012.00                                                     | 24.35    | 27.78         | 32.38 |
|    | No                                                             | 16.55                                                     | 47.61 | 58.94                   | 34.66    | 45.98                                                        | 16.26    | 31.39         | 67.82 |
|    | Yes, of people of <16 y.o.                                     | 25.99                                                     | 21.93 | 13.68                   | 25.33    | 33.96                                                        | 48.69    | 13.52         | 3.07  |
|    | Yes, of people of >16 y.o.                                     | 13.02                                                     | 10.35 | 6.31                    | 6.66     | 4.81                                                         | 12.58    | 23.54         | 6.73  |
| 7  | Yes, siblings                                                  | 1.36                                                      | 0.96  | 4.21                    | 2.66     | 1.57                                                         | 0.86     | 1.33          | 1.28  |
|    | Yes, parents                                                   | 16.1                                                      | 12.66 | 10.52                   | 17.33    | 8.41                                                         | 16.92    | 23.03         | 10.92 |
|    | Yes, others                                                    | 6.95                                                      | 6.46  | 6.31                    | 13.33    | 5.24                                                         | 4.66     | 7.17          | 10.16 |
|    | None                                                           | 40.62                                                     | 51.34 |                         |          | 48.85                                                        | 18.85    | 35.96         | 70.47 |
|    | 1 option selected                                              | 25.9                                                      | 22.11 | 11.3                    | 5.79     | 13.12                                                        | 21.03    | 39.98         | 24.24 |
| 8  | 2 options selected                                             | 28.23                                                     | 22.83 |                         |          | 34.82                                                        | 49.43    | 19.32         | 4.51  |
|    | 3 options selected                                             | 4.77                                                      | 3.39  |                         |          | 2.82                                                         | 9.88     | 4.31          | 0.61  |
|    | 4 options selected                                             | 0.41                                                      | 0.30  |                         |          | 0.31                                                         | 0.73     | 0.38          | 0.11  |
|    | 5 options selected                                             | 0.04                                                      | 0.01  |                         |          | 0.04                                                         | 0.04     | 0.02          | 0.02  |
|    | No                                                             | 76.13                                                     | 72.73 | 63.63                   | 65.21    | 68.4                                                         | 69.41    | 73.65         | 88.18 |
| 9  | Yes, the company made a labour force adjustment plan           | 0.18                                                      | 0.17  | 0.00                    | 0.00     | 0.22                                                         | 0.26     | 0.15          | 0.09  |
|    | Yes, the company made a temporary labour force adjustment plan | 9.70                                                      | 10.01 | 9.09                    | 7.24     | 14.5                                                         | 13.04    | 9.9           | 2.17  |
|    | Yes, I have lost some jobs previously contracted/arranged      | 4.93                                                      | 7.61  | 15.9                    | 14.49    | 6.75                                                         | 7.17     | 6.68          | 2.54  |
|    | Yes, I was fired                                               | 0.96                                                      | 0.68  | 2.27                    | 0.00     | 1.79                                                         | 0.96     | 0.67          | 0.16  |
|    | Yes, others                                                    | 8.08                                                      | 8.77  | 9.09                    | 13.04    | 8.3                                                          | 9.12     | 8.93          | 6.83  |
| 10 | No                                                             | 22.00                                                     | 18.00 | 30.00                   | 26.00    | 20.34                                                        | 24.48    | 22.21         | 15.82 |
|    | Yes                                                            | 34.00                                                     | 40.00 | 23.00                   | 28.00    | 36.22                                                        | 32.37    | 33.65         | 40.55 |
|    | None                                                           | 44.00                                                     | 42.00 | 48.00                   | 46.00    | 43.43                                                        | 43.14    | 44.13         | 43.62 |
|    | Yes, one                                                       | 58.75                                                     | 59.47 | 80.68                   | 57.97    | 64.04                                                        | 59.65    | 54.68         | 76.91 |
|    | Yes, more than one                                             | 36.17                                                     | 34.37 | 18.18                   | 36.23    | 31.76                                                        | 50.8     | 39.81         | 20.66 |
| 11 | No                                                             | 5.07                                                      | 6.14  | 5.79                    | 6.66     | 4.18                                                         | 5.44     | 5.49          | 2.43  |
|    | Yes                                                            | 76.00                                                     | 76.00 | 51.00                   | 66.00    | 56.64                                                        | 75.05    | 83.23         | 87.08 |
|    | Yes                                                            | 24.00                                                     | 24.00 | 49.00                   | 34.00    | 43.35                                                        | 24.94    | 16.76         | 12.91 |
|    | Yes                                                            | 59.85                                                     | 62.61 | 59.09                   | 69.56    | 64.15                                                        | 58.86    | 60.49         | 59.52 |
|    | A little                                                       | 22.34                                                     | 21.56 | 13.63                   | 17.39    | 19.89                                                        | 23.74    | 22.72         | 21.87 |
| 12 | No                                                             | 17.80                                                     | 15.82 | 27.27                   | 13.04    | 15.95                                                        | 17.38    | 16.87         | 18.59 |
|    | No                                                             | 91.42                                                     | 90.8  | 80.68                   | 81.15    | 88.95                                                        | 88.41    | 90.73         | 96.48 |
|    | Not yet, but will need to                                      | 4.71                                                      | 5.19  | 10.22                   | 8.69     | 6.34                                                         | 6.43     | 5.08          | 1.81  |
|    | Yes                                                            | 3.85                                                      | 3.99  | 9.09                    | 10.14    | 4.7                                                          | 5.15     | 4.18          | 1.7   |
|    | <7                                                             | 26.19                                                     | 17.04 | 22.47                   | 17.39    | 21.17                                                        | 30.35    | 26.04         | 22.72 |
| 13 | 7-8.5                                                          | 20.00                                                     | 10.22 | 20.12                   | 10.14    | 33.2                                                         | 28.42    | 32.07         | 36.36 |
|    | 8.5-10                                                         | 32.09                                                     | 32.95 | 33.59                   | 43.47    | 17.38                                                        | 18.8     | 19.27         | 24.3  |
|    | >10                                                            | 21.71                                                     | 39.77 | 23.8                    | 28.98    | 28.24                                                        | 22.41    | 22.6          | 16.59 |
|    | No, I am forced to go to work                                  | 0.33                                                      | 0.55  | 2.29                    | 1.44     | 0.54                                                         | 0.56     | 0.4           | 0.1   |
|    | No, I need to work                                             | 0.69                                                      | 1.51  | 1.14                    | 1.44     | 0.75                                                         | 0.79     | 0.88          | 1.3   |
| 14 | No, I work on essential services                               | 13.73                                                     | 12.39 | 13.79                   | 7.24     | 16.36                                                        | 17.77    | 15.19         | 4.47  |
|    | Yes                                                            | 54.13                                                     | 57.73 | 43.67                   | 62.31    | 43.85                                                        | 39.51    | 48.13         | 87.39 |
|    | Yes, teleworking                                               | 21.11                                                     | 27.70 | 39.08                   | 27.53    | 39.48                                                        | 41.35    | 38.37         | 6.71  |
|    | Yes, going shopping                                            | 18.9                                                      | 13.39 | 17.17                   | 10.14    | 17.82                                                        | 18.59    | 16.69         | 16.19 |
|    | Yes, to infect others                                          | 23.89                                                     | 17.68 | 30.3                    | 24.63    | 28.52                                                        | 24.76    | 22.13         | 13.85 |
| 15 | Yes, to get infected                                           | 35.04                                                     | 30.47 | 26.26                   | 27.53    | 31.87                                                        | 33.57    | 34.33         | 34.9  |
|    | Elders                                                         | 36.23                                                     | 34.25 | 43.33                   | 23.52    | 42.05                                                        | 35.33    | 36.86         | 22.98 |
|    | Anyone                                                         | 48.63                                                     | 51.26 | 50.00                   | 70.58    | 41.27                                                        | 41.49    | 54.17         | 69.79 |
|    | Children                                                       | 13.32                                                     | 12.97 | 3.33                    | 5.88     | 14.28                                                        | 21.55    | 7.21          | 6.47  |
|    | Colleagues at work                                             | 1.81                                                      | 1.50  | 3.33                    | 0.00     | 2.38                                                         | 1.61     | 1.74          | 0.74  |
| 16 | No                                                             | 55.2                                                      | 64.77 | 41.22                   | 50.00    | 42.95                                                        | 51.97    | 59.86         | 77.68 |
|    | Yes, alcohol                                                   | 5.57                                                      | 6.74  | 8.77                    | 9.75     | 8.88                                                         | 7.23     | 5.01          | 2.47  |
|    | Yes, food                                                      | 26.26                                                     | 19.40 | 22.8                    | 20.73    | 33.04                                                        | 27.44    | 22.72         | 13.4  |
|    | Yes, illegal drugs                                             | 0.25                                                      | 0.73  | 5.26                    | 2.43     | 1.07                                                         | 0.28     | 0.16          | 0.09  |
|    | Yes, drugs to calm down                                        | 4.83                                                      | 2.44  | 8.77                    | 6.09     | 4.24                                                         | 4.99     | 4.27          | 3.07  |
| 17 | Yes, tobacco                                                   | 7.85                                                      | 5.89  | 13.15                   | 10.97    | 9.79                                                         | 8.06     | 7.95          | 3.27  |
|    | Social media                                                   | 30.09                                                     | 27.20 | 35.00                   | 30.88    | 7.49                                                         | 5.45     | 3.41          | 1.49  |
|    | TV                                                             | 37.48                                                     | 35.18 | 28.33                   | 31.61    | 50.54                                                        | 50.41    | 50.03         | 48.38 |
|    | Radio                                                          | 14.94                                                     | 16.67 | 10.00                   | 12.5     | 13.74                                                        | 20.14    | 22.9          | 25.1  |
|    | Newspapers                                                     | 12.83                                                     | 15.18 | 15.00                   | 11.76    | 19.17                                                        | 16.7     | 17.07         | 20.19 |
| 18 | Other                                                          | 4.63                                                      | 5.74  | 11.66                   | 13.23    | 9.03                                                         | 7.27     | 6.52          | 4.82  |
|    | It's ok                                                        | 19.28                                                     | 18.40 | 6.33                    | 13.18    | 9.76                                                         | 17.8     | 28.13         | 26.74 |
|    | The Government explains too much                               | 2.65                                                      | 4.55  | 0.00                    | 2.19     | 1.44                                                         | 2.28     | 3.88          | 6.66  |
|    | The Government explains too less                               | 9.06                                                      | 8.60  | 14.08                   | 9.89     | 8.99                                                         | 8.56     | 9.7           | 8.53  |
|    | Media explain too much                                         | 12.49                                                     | 13.43 | 11.97                   | 8.79     | 9.69                                                         | 10.46    | 14.32         | 19.21 |
| 19 | Media explain too less                                         | 2.8                                                       | 3.11  | 5.63                    | 8.79     | 2.68                                                         | 2.69     | 3.53          | 2.96  |
|    | Too negative                                                   | 20.47                                                     | 21.90 | 25.35                   | 18.68    | 41.88                                                        | 26.09    | 0.24          | 0.11  |
|    | Poorly adjusted to the reality                                 | 27.34                                                     | 25.60 | 30.98                   | 29.67    | 21.13                                                        | 25.61    | 33.57         | 31.12 |
|    | I do not think anything about it                               | 5.87                                                      | 4.36  | 5.63                    | 8.79     | 4.38                                                         | 6.47     | 6.6           | 4.64  |
|    | No                                                             | 18.11                                                     | 29.88 | 23.07                   | 23.25    | 17.23                                                        | 19.43    | 21.13         | 28.05 |
| 20 | Yes, my personality                                            | 5.18                                                      | 3.71  | 9.4                     | 5.81     | 8.17                                                         | 5.55     | 3.59          | 2.02  |
|    | Yes, my vision of the society/ho                               | 51.74                                                     | 47.05 | 43.58                   | 50.00    | 50.98                                                        | 51.86    | 52.4          | 46.36 |
|    | Yes, my life                                                   | 24.95                                                     | 19.34 | 23.93                   | 20.93    | 23.6                                                         | 23.14    | 23.17         | 23.56 |
|    | I do not know                                                  | 79.01                                                     | 82.93 | 70.32                   | 82.6     | 75.00                                                        | 76.77    | 79.62         | 88.72 |
|    | Yes, with a probable non-confirmed case                        | 10.16                                                     | 9.01  | 16.48                   | 5.79     | 13.05                                                        | 11.61    | 9.79          | 5.14  |
| 21 | Yes, with a confirmed case                                     | 10.81                                                     | 8.04  | 13.18                   | 11.59    | 11.93                                                        | 11.61    | 10.58         | 6.12  |
|    | No                                                             | 22.92                                                     | 35.72 | 11.29                   | 37.75    | 15.55                                                        | 20.98    | 28.09         | 46.06 |
|    | Headache                                                       | 17.06                                                     | 13.02 | 13.7                    | 8.16     | 17.59                                                        | 18.01    | 16.29         | 10.81 |
|    | Sore throat                                                    | 10.51                                                     | 7.95  | 9.27                    | 13.26    | 10.81                                                        | 10.59    | 9.47          | 7.96  |
|    | Nasal congestion/running nose                                  | 9.1                                                       | 9.37  | 10.08                   | 12.24    | 12.06                                                        | 9.05     | 8.28          | 6.2   |
| 22 | Extreme fatigue/iredness                                       | 7.47                                                      | 5.30  | 10.48                   | 4.08     | 7.92                                                         | 7.57     | 6.76          | 4.77  |
|    | Persistent cough (for one week or more)                        | 6.96                                                      | 6.50  | 6.85                    | 7.14     | 6.71                                                         | 6.94     | 6.92          | 6.81  |
|    | Muscle pain                                                    | 6.57                                                      | 5.15  | 8.87                    | 4.08     | 6.54                                                         | 6.78     | 6.43          | 4.67  |
|    | Diarrhea                                                       | 5.37                                                      | 5.32  | 8.46                    | 6.12     | 6.74                                                         | 5.63     | 5.06          | 3.36  |
|    | Dizziness                                                      | 3.14                                                      | 1.95  | 8.08                    | 2.04     | 3.92                                                         | 2.97     | 2.53          | 1.54  |
| 23 | Shortness of breath                                            | 2.27                                                      | 1.95  | 3.62                    | 2.04     | 2.88                                                         | 2.48     | 1.88          | 1.19  |
|    | Chest pain                                                     | 1.96                                                      | 1.74  | 1.2                     | 2.04     | 2.38                                                         | 2.28     | 1.71          | 0.93  |
|    | Loss of smell, small blindness                                 | 1.93                                                      | 1.66  | 2.41                    | 1.02     | 2.15                                                         | 2.05     | 1.76          | 1.31  |
|    | Persistent fever (for one week or more)                        | 1.58                                                      | 1.79  | 2.41                    | 0.00     | 1.5                                                          | 1.5      | 1.83          | 1.76  |
|    | Loss of appetite/weight                                        | 1.38                                                      | 1.10  | 2.01                    | 0.00     | 1.38                                                         | 1.3      | 1.26          | 1.28  |
| 24 | Loss of taste                                                  | 1.74                                                      | 1.42  | 1.2                     | 0.00     | 1.79                                                         | 1.79     | 1.66          | 1.28  |
|    | Well                                                           | 64.92                                                     | 70.28 | 52.87                   | 60.86    | 68.25                                                        | 67.4     | 64.28         | 65.97 |
|    | Normal                                                         | 22.84                                                     | 21.6  | 18.39                   | 24.63    | 19.31                                                        | 19.85    | 23.86         | 26.65 |
|    | Not at 100%                                                    | 11.76                                                     | 7.83  | 2                       |          |                                                              |          |               |       |



1  
2  
3  
4  
5  
6  
7  
8  
9  
10  
11  
12  
13  
14  
15  
16  
17  
18  
19  
20  
21  
22  
23  
24  
25  
26  
27  
28  
29  
30  
31  
32  
33  
34  
35  
36  
37  
38  
39  
40  
41  
42  
43  
44  
45  
46  
47  
48  
49  
50  
51  
52  
53  
54  
55  
56  
57  
58  
59  
60STROBE Statement—Checklist of items that should be included in reports of *cross-sectional studies*

|                              | Item No | Recommendation                                                                                                                                                                                    | Page No        |
|------------------------------|---------|---------------------------------------------------------------------------------------------------------------------------------------------------------------------------------------------------|----------------|
| <b>Title and abstract</b>    | 1       | (a) Indicate the study's design with a commonly used term in the title or the abstract                                                                                                            | 1              |
|                              |         | (b) Provide in the abstract an informative and balanced summary of what was done and what was found                                                                                               | 2              |
| <b>Introduction</b>          |         |                                                                                                                                                                                                   |                |
| Background/rationale         | 2       | Explain the scientific background and rationale for the investigation being reported                                                                                                              | 4-5            |
| Objectives                   | 3       | State specific objectives, including any prespecified hypotheses                                                                                                                                  | 5              |
| <b>Methods</b>               |         |                                                                                                                                                                                                   |                |
| Study design                 | 4       | Present key elements of study design early in the paper                                                                                                                                           | 5-6            |
| Setting                      | 5       | Describe the setting, locations, and relevant dates, including periods of recruitment, exposure, follow-up, and data collection                                                                   | 5-6            |
| Participants                 | 6       | (a) Give the eligibility criteria, and the sources and methods of selection of participants                                                                                                       | 5              |
| Variables                    | 7       | Clearly define all outcomes, exposures, predictors, potential confounders, and effect modifiers. Give diagnostic criteria, if applicable                                                          | 5-6            |
| Data sources/<br>measurement | 8*      | For each variable of interest, give sources of data and details of methods of assessment (measurement). Describe comparability of assessment methods if there is more than one group              | 5-7            |
| Bias                         | 9       | Describe any efforts to address potential sources of bias                                                                                                                                         | 6-7            |
| Study size                   | 10      | Explain how the study size was arrived at                                                                                                                                                         | 7              |
| Quantitative variables       | 11      | Explain how quantitative variables were handled in the analyses. If applicable, describe which groupings were chosen and why                                                                      | N/A            |
| Statistical methods          | 12      | (a) Describe all statistical methods, including those used to control for confounding                                                                                                             | 6-8            |
|                              |         | (b) Describe any methods used to examine subgroups and interactions                                                                                                                               | 6-8            |
|                              |         | (c) Explain how missing data were addressed                                                                                                                                                       | 6-8            |
|                              |         | (d) If applicable, describe analytical methods taking account of sampling strategy                                                                                                                | 6-8            |
|                              |         | (e) Describe any sensitivity analyses                                                                                                                                                             | N/A            |
| <b>Results</b>               |         |                                                                                                                                                                                                   |                |
| Participants                 | 13*     | (a) Report numbers of individuals at each stage of study—eg numbers potentially eligible, examined for eligibility, confirmed eligible, included in the study, completing follow-up, and analysed | 5, 8           |
|                              |         | (b) Give reasons for non-participation at each stage                                                                                                                                              | N/A            |
|                              |         | (c) Consider use of a flow diagram                                                                                                                                                                | -              |
| Descriptive data             | 14*     | (a) Give characteristics of study participants (eg demographic, clinical, social) and information on exposures and potential confounders                                                          | 8-11           |
|                              |         | (b) Indicate number of participants with missing data for each variable of interest                                                                                                               | 29-34          |
| Outcome data                 | 15*     | Report numbers of outcome events or summary measures                                                                                                                                              | 8-11,<br>29-37 |

|    |                          |    |                                                                                                                                                                                                              |
|----|--------------------------|----|--------------------------------------------------------------------------------------------------------------------------------------------------------------------------------------------------------------|
| 1  |                          |    |                                                                                                                                                                                                              |
| 2  | Main results             | 16 | (a) Give unadjusted estimates and, if applicable, confounder-adjusted estimates and their precision (eg, 95% confidence interval). Make clear which confounders were adjusted for and why they were included |
| 3  |                          |    | 8-11, 29-37                                                                                                                                                                                                  |
| 4  |                          |    |                                                                                                                                                                                                              |
| 5  |                          |    |                                                                                                                                                                                                              |
| 6  |                          |    | (b) Report category boundaries when continuous variables were categorized                                                                                                                                    |
| 7  |                          |    |                                                                                                                                                                                                              |
| 8  |                          |    | (c) If relevant, consider translating estimates of relative risk into absolute risk for a meaningful time period                                                                                             |
| 9  |                          |    |                                                                                                                                                                                                              |
| 10 |                          |    |                                                                                                                                                                                                              |
| 11 | Other analyses           | 17 | Report other analyses done—eg analyses of subgroups and interactions, and sensitivity analyses                                                                                                               |
| 12 |                          |    |                                                                                                                                                                                                              |
| 13 |                          |    |                                                                                                                                                                                                              |
| 14 | <b>Discussion</b>        |    |                                                                                                                                                                                                              |
| 15 | Key results              | 18 | Summarise key results with reference to study objectives                                                                                                                                                     |
| 16 |                          |    | 17                                                                                                                                                                                                           |
| 17 | Limitations              | 19 | Discuss limitations of the study, taking into account sources of potential bias or imprecision. Discuss both direction and magnitude of any potential bias                                                   |
| 18 |                          |    | 11-12                                                                                                                                                                                                        |
| 19 |                          |    |                                                                                                                                                                                                              |
| 20 | Interpretation           | 20 | Give a cautious overall interpretation of results considering objectives, limitations, multiplicity of analyses, results from similar studies, and other relevant evidence                                   |
| 21 |                          |    | 11-17                                                                                                                                                                                                        |
| 22 |                          |    |                                                                                                                                                                                                              |
| 23 |                          |    |                                                                                                                                                                                                              |
| 24 | Generalisability         | 21 | Discuss the generalisability (external validity) of the study results                                                                                                                                        |
| 25 |                          |    | 11-17                                                                                                                                                                                                        |
| 26 | <b>Other information</b> |    |                                                                                                                                                                                                              |
| 27 | Funding                  | 22 | Give the source of funding and the role of the funders for the present study and, if applicable, for the original study on which the present article is based                                                |
| 28 |                          |    | 19                                                                                                                                                                                                           |
| 29 |                          |    |                                                                                                                                                                                                              |
| 30 |                          |    |                                                                                                                                                                                                              |

\*Give information separately for exposed and unexposed groups.

**Note:** An Explanation and Elaboration article discusses each checklist item and gives methodological background and published examples of transparent reporting. The STROBE checklist is best used in conjunction with this article (freely available on the Web sites of PLoS Medicine at <http://www.plosmedicine.org/>, Annals of Internal Medicine at <http://www.annals.org/>, and Epidemiology at <http://www.epidem.com/>). Information on the STROBE Initiative is available at [www.strobe-statement.org](http://www.strobe-statement.org).
