# Supplementary material for: Identification of the most vulnerable populations in the psychosocial sphere: a cross-sectional study conducted in Catalonia during the strict lockdown imposed against the COVID-19 pandemic
Source: PubMed Central journal article supplement — BMJ Open. 2021 Nov 26;11(11):e052140. doi: 10.1136/bmjopen-2021-052140 (PMC8628111; doi:10.1136/bmjopen-2021-052140), 2021-11-26
Supplement: bmjopen-2021-052140supp002.pdf [file bmjopen-2021-052140supp002.pdf]

| ANSWER CATEGORIES                                                                | Conditional distributions given the responders gender (%)      |       |            |            | Conditional distributions given the responders age range (%) |          |             |             | p     |          |
|----------------------------------------------------------------------------------|----------------------------------------------------------------|-------|------------|------------|--------------------------------------------------------------|----------|-------------|-------------|-------|----------|
|                                                                                  | women                                                          | men   | non binary | not saying | p (women vs men)                                             | <42 y.o. | 42- 52 y.o. | 52- 64 y.o. |       | >61 y.o. |
| Civil status                                                                     | Married                                                        | 51.04 | 60.21      | 14.77      | 27.94                                                        | 32.2     | 56.74       | 61.12       | 63.22 |          |
|                                                                                  | Divorced                                                       | 11.75 | 7.94       | 5.68       | 16.17                                                        | 2.52     | 11.33       | 15.14       | 13.08 |          |
|                                                                                  | In couple                                                      | 18.49 | 17.19      | 39.77      | 23.52                                                        | 38.02    | 38.14       | 10.91       | 6.83  |          |
|                                                                                  | Single                                                         | 14.51 | 12.89      | 38.63      | 30.88                                                        | 27.15    | 12.85       | 10.06       | 7.2   |          |
|                                                                                  | Widow                                                          | 4.18  | 1.54       | 1.13       | 1.47                                                         | 0.08     | 0.71        | 2.75        | 9.63  |          |
| Housing                                                                          | Owned apartment/house                                          | 91.08 | 90.89      | 64.36      | 72.46                                                        | 79.44    | 94.22       | 95.08       | 94.48 |          |
|                                                                                  | Shared apartment/house                                         | 7.7   | 7.9        | 26.43      | 23.18                                                        | 18.43    | 4.99        | 4.11        | 4.33  |          |
|                                                                                  | Rented room                                                    | 1.05  | 1.07       | 8.04       | 0.00                                                         | 2.01     | 0.81        | 0.67        | 0.83  | p<0.01   |
|                                                                                  | Centre/institution                                             | 0.13  | 0.09       | 0.00       | 0.00                                                         | 0.05     | 0.03        | 0.09        | 0.3   |          |
|                                                                                  | Homeless                                                       | 0.02  | 0.03       | 1.14       | 4.24                                                         | 0.05     | 0.01        | 0.02        | 0.00  |          |
| Education                                                                        | Primary Education                                              | 3.52  | 4.63       | 5.69       | 5.79                                                         | 1.53     | 3.3         | 4.24        | 6.1   |          |
|                                                                                  | Secondary Education                                            | 5.18  | 6.17       | 3.4        | 1.44                                                         | 4.83     | 4.49        | 5.19        | 7.09  |          |
|                                                                                  | High School                                                    | 29.92 | 35.46      | 29.54      | 28.98                                                        | 27.54    | 30.98       | 34.17       | 33.11 |          |
|                                                                                  | Degree                                                         | 44.99 | 36.96      | 31.81      | 33.33                                                        | 38.72    | 43.92       | 43.48       | 44.26 | p<0.01   |
|                                                                                  | Master                                                         | 13.47 | 12.77      | 26.13      | 21.73                                                        | 24.32    | 14.3        | 9.7         | 5.65  |          |
| Employment                                                                       | PhD                                                            | 2.9   | 3.98       | 3.4        | 8.69                                                         | 3.03     | 2.99        | 3.2         | 3.67  |          |
|                                                                                  | Qualified job                                                  | 36.95 | 34.15      | 35.22      | 37.68                                                        | 48.19    | 48.76       | 41.3        | 7.86  |          |
|                                                                                  | Non qualified job                                              | 3.51  | 3.78       | 9.09       | 2.89                                                         | 4.39     | 4.46        | 4.49        | 1.15  |          |
|                                                                                  | Job in Healthcare                                              | 10.9  | 4.67       | 9.09       | 1.44                                                         | 12.16    | 10.58       | 9.21        | 3.64  |          |
|                                                                                  | Home/people care                                               | 6.24  | 1.42       | 0.00       | 2.89                                                         | 0.94     | 1.09        | 3.25        | 12.86 |          |
| People financially providing at home                                             | Self-employed                                                  | 8.03  | 11.41      | 9.09       | 15.94                                                        | 7.72     | 11.45       | 11.4        | 5.59  | 0<0.01   |
|                                                                                  | Company owner                                                  | 3.00  | 7.36       | 1.13       | 1.44                                                         | 2.39     | 5.66        | 5.9         | 3.05  |          |
|                                                                                  | Unemployed                                                     | 5.29  | 4.54       | 12.5       | 11.59                                                        | 7.63     | 4.62        | 5.61        | 2.69  |          |
|                                                                                  | Other                                                          | 26.03 | 32.63      | 23.86      | 26.08                                                        | 16.54    | 12.73       | 18.8        | 62.13 |          |
|                                                                                  | 2                                                              | 8.03  | 7.03       | 14.57      | 16.49                                                        | 13.59    | 8.99        | 7.26        | 6.1   |          |
| Care of someone                                                                  | Yes, of people of <16 y.o.                                     | 13.02 | 10.35      | 6.31       | 6.66                                                         | 4.81     | 12.58       | 23.54       | 6.73  | <0.01    |
|                                                                                  | Yes, of people of >16 y.o.                                     | 1.36  | 0.96       | 4.21       | 2.66                                                         | 1.57     | 0.86        | 1.33        | 1.28  |          |
|                                                                                  | Yes, siblings                                                  | 16.1  | 12.66      | 10.52      | 17.33                                                        | 8.41     | 16.92       | 23.03       | 10.92 |          |
|                                                                                  | Yes, parents                                                   | 6.95  | 6.46       | 6.31       | 13.33                                                        | 5.24     | 4.64        | 5.49        | 2.42  |          |
|                                                                                  | Yes, others                                                    | 40.62 | 51.34      |            |                                                              | 48.85    | 18.85       | 35.96       | 70.47 |          |
| Burden of care                                                                   | 1 option selected                                              | 25.9  | 22.11      |            |                                                              | 13.12    | 21.03       | 39.98       | 24.24 |          |
|                                                                                  | 2 options selected                                             | 28.23 | 22.83      |            |                                                              | 34.82    | 49.43       | 19.32       | 4.51  | <0.01    |
|                                                                                  | 3 options selected                                             | 4.77  | 3.39       |            |                                                              | 2.82     | 9.88        | 4.31        | 0.61  |          |
|                                                                                  | 4 options selected                                             | 0.41  | 0.30       |            |                                                              | 0.31     | 0.73        | 0.38        | 0.11  |          |
|                                                                                  | 5 options selected                                             | 0.04  | 0.01       |            |                                                              | 0.04     | 0.04        | 0.02        | 0.02  |          |
| Low of job                                                                       | No                                                             | 76.13 | 72.73      | 63.63      | 65.21                                                        | 68.4     | 69.41       | 73.65       | 88.18 |          |
|                                                                                  | Yes, the company made a labour force adjustment plan           | 0.18  | 0.17       | 0.00       | 0.00                                                         | 0.22     | 0.26        | 0.15        | 0.09  |          |
|                                                                                  | Yes, the company made a temporary labour force adjustment plan | 9.70  | 10.01      | 9.09       | 7.24                                                         | 14.5     | 13.04       | 9.9         | 2.17  | <0.01    |
|                                                                                  | Yes, I have lost some jobs previously contracted/arranged      | 4.93  | 7.61       | 15.9       | 14.49                                                        | 6.75     | 7.17        | 6.68        | 2.54  |          |
|                                                                                  | Yes, I was fired                                               | 0.96  | 0.68       | 2.27       | 0.00                                                         | 1.79     | 0.96        | 0.67        | 0.16  |          |
| Savings                                                                          | Yes, others                                                    | 8.08  | 8.77       | 9.09       | 13.04                                                        | 8.3      | 9.12        | 8.95        | 6.83  |          |
|                                                                                  | No                                                             | 22.00 | 18.00      | 30.00      | 26.00                                                        | 20.34    | 24.48       | 22.21       | 15.82 |          |
|                                                                                  | Yes                                                            | 34.00 | 40.00      | 23.00      | 28.00                                                        | 36.22    | 32.37       | 33.65       | 40.55 | <0.01    |
|                                                                                  | Some                                                           | 44.00 | 42.00      | 48.00      | 46.00                                                        | 43.43    | 43.14       | 44.13       | 43.62 |          |
|                                                                                  | No                                                             | 58.75 | 59.47      | 80.68      | 57.97                                                        | 64.04    | 39.65       | 54.68       | 76.91 | <0.01    |
| Mortgage to pay                                                                  | Yes, one                                                       | 36.17 | 34.27      | 18.18      | 36.23                                                        | 31.76    | 50.8        | 39.81       | 20.66 | <0.01    |
|                                                                                  | Yes, more than one                                             | 5.07  | 6.14       | 1.13       | 5.29                                                         | 4.18     | 4.64        | 4.49        | 2.42  |          |
|                                                                                  | No                                                             | 76.00 | 76.00      | 51.00      | 66.00                                                        | 56.64    | 75.05       | 83.23       | 87.08 |          |
|                                                                                  | Yes                                                            | 24.00 | 24.00      | 49.00      | 34.00                                                        | 43.35    | 24.94       | 16.76       | 12.91 | <0.01    |
|                                                                                  | Yes                                                            | 59.85 | 62.61      | 59.09      | 69.56                                                        | 64.15    | 58.86       | 60.4        | 59.52 |          |
| Seek for social assistance/or any other assistance                               | A little                                                       | 22.34 | 21.56      | 13.63      | 17.39                                                        | 19.89    | 23.74       | 22.72       | 21.87 |          |
|                                                                                  | No                                                             | 17.80 | 15.82      | 27.27      | 13.04                                                        | 15.95    | 17.38       | 16.87       | 18.59 |          |
|                                                                                  | Yes                                                            | 91.42 | 90.88      | 80.68      | 81.15                                                        | 88.95    | 88.14       | 90.73       | 88.18 |          |
|                                                                                  | Not yet, but will need to                                      | 4.71  | 5.19       | 10.22      | 8.69                                                         | 6.34     | 6.43        | 5.08        | 1.81  | <0.01    |
|                                                                                  | Yes                                                            | 3.85  | 3.99       | 9.09       | 10.14                                                        | 4.7      | 5.15        | 4.18        | 1.7   |          |
| Index of socio-economic deprivation -score                                       | -7                                                             | 26.19 | 17.04      | 22.47      | 17.39                                                        | 21.17    | 30.35       | 26.04       | 22.72 |          |
|                                                                                  | -8.5                                                           | 20.00 | 10.22      | 20.12      | 10.14                                                        | 33.2     | 28.42       | 32.07       | 36.36 | p<0.01   |
|                                                                                  | 8.5-10                                                         | 32.09 | 32.95      | 33.59      | 43.47                                                        | 17.38    | 18.8        | 19.27       | 24.3  |          |
|                                                                                  | >10                                                            | 21.71 | 39.77      | 23.8       | 28.98                                                        | 28.24    | 22.41       | 22.6        | 16.59 |          |
|                                                                                  | No, I am forced to go to work                                  | 0.33  | 0.55       | 2.29       | 1.44                                                         | 0.54     | 0.56        | 0.4         | 0.1   |          |
| Staying home                                                                     | No, I need to work                                             | 0.69  | 1.51       | 1.14       | 1.44                                                         | 0.75     | 0.79        | 0.88        | 1.3   |          |
|                                                                                  | No, I work on essential services                               | 13.73 | 12.59      | 13.79      | 7.24                                                         | 16.36    | 17.77       | 15.19       | 4.47  | p<0.01   |
|                                                                                  | Yes                                                            | 54.13 | 57.73      | 43.67      | 62.31                                                        | 43.85    | 39.51       | 48.13       | 87.39 |          |
|                                                                                  | Yes, teleworking                                               | 31.1  | 27.79      | 39.08      | 27.53                                                        | 38.48    | 41.35       | 35.37       | 6.71  |          |
|                                                                                  | No                                                             | 22.14 | 38.44      | 26.26      | 37.68                                                        | 21.77    | 23.06       | 26.82       | 35.04 |          |
| Afraid                                                                           | Yes, going shopping                                            | 18.9  | 13.39      | 17.17      | 10.14                                                        | 17.82    | 18.59       | 16.69       | 16.18 |          |
|                                                                                  | Yes, to assist others                                          | 23.89 | 17.68      | 30.3       | 24.63                                                        | 28.52    | 24.76       | 22.13       | 13.85 | p<0.01   |
|                                                                                  | Yes, to get infected                                           | 35.04 | 30.47      | 26.26      | 27.53                                                        | 31.87    | 33.57       | 34.33       | 34.9  |          |
|                                                                                  | Elders                                                         | 36.23 | 34.25      | 43.33      | 23.52                                                        | 42.05    | 35.33       | 36.86       | 22.98 |          |
|                                                                                  | Anyone                                                         | 48.63 | 51.26      | 50.00      | 70.58                                                        | 41.27    | 41.49       | 54.17       | 69.79 | p<0.01   |
| Increased consume of substances                                                  | Children                                                       | 13.32 | 12.97      | 3.33       | 5.88                                                         | 14.28    | 21.55       | 7.21        | 6.47  |          |
|                                                                                  | Colleagues at work                                             | 1.81  | 1.50       | 3.33       | 0.00                                                         | 2.38     | 1.61        | 1.74        | 0.74  |          |
|                                                                                  | Yes, alcohol                                                   | 5.57  | 6.74       | 8.77       | 9.75                                                         | 8.88     | 7.23        | 5.01        | 2.47  |          |
|                                                                                  | Yes, food                                                      | 26.26 | 19.40      | 22.8       | 20.73                                                        | 33.04    | 27.44       | 22.72       | 13.4  | p<0.01   |
|                                                                                  | Yes, illegal drugs                                             | 0.25  | 0.73       | 5.26       | 2.43                                                         | 1.07     | 0.28        | 0.16        | 0.00  |          |
| Media to get information about the pandemic                                      | Yes, drugs to calm down                                        | 4.83  | 2.44       | 8.77       | 6.09                                                         | 4.24     | 4.99        | 4.27        | 3.07  |          |
|                                                                                  | Yes, tobacco                                                   | 7.85  | 5.89       | 13.15      | 10.97                                                        | 9.79     | 8.06        | 7.95        | 3.27  |          |
|                                                                                  | Social media                                                   | 30.09 | 27.20      | 35.00      | 30.88                                                        | 42.95    | 51.97       | 59.66       | 77.68 |          |
|                                                                                  | Radio                                                          | 37.48 | 35.18      | 28.33      | 31.61                                                        | 50.54    | 50.41       | 50.03       | 48.38 |          |
|                                                                                  | TV                                                             | 14.94 | 16.67      | 10.00      | 12.5                                                         | 13.74    | 20.14       | 22.9        | 25.1  |          |
| Thoughts about the information received                                          | Newspapers                                                     | 12.83 | 15.18      | 15.00      | 11.76                                                        | 19.17    | 16.7        | 17.07       | 20.19 |          |
|                                                                                  | Other                                                          | 4.63  | 5.74       | 11.66      | 13.23                                                        | 9.03     | 7.27        | 6.52        | 4.82  |          |
|                                                                                  | It's ok                                                        | 19.28 | 18.40      | 6.33       | 13.18                                                        | 9.76     | 17.8        | 28.13       | 26.74 |          |
|                                                                                  | The Government explains too much                               | 2.65  | 4.55       | 0.00       | 2.19                                                         | 1.44     | 2.28        | 3.88        | 6.66  |          |
|                                                                                  | The Government explains too less                               | 9.06  | 8.60       | 14.08      | 9.89                                                         | 8.99     | 8.56        | 9.7         | 8.53  | <0.01    |
| Impact of the pandemic on people (subjective)                                    | Media explain too much                                         | 12.49 | 13.43      | 11.97      | 8.79                                                         | 9.69     | 10.46       | 14.32       | 19.21 |          |
|                                                                                  | Media explain too less                                         | 2.8   | 3.11       | 5.63       | 8.79                                                         | 2.68     | 2.69        | 3.53        | 2.96  |          |
|                                                                                  | Too negative                                                   | 20.47 | 21.99      | 25.35      | 18.68                                                        | 41.88    | 26.09       | 0.24        | 0.11  |          |
|                                                                                  | Positively adjusted to the reality                             | 27.34 | 25.69      | 30.98      | 29.67                                                        | 21.13    | 25.61       | 33.57       | 31.13 |          |
|                                                                                  | I do not think anything about it                               | 5.87  | 4.36       | 5.63       | 8.79                                                         | 4.38     | 6.47        | 6.6         | 4.44  |          |
| Contact with someone infected by SARS-CoV-2                                      | No                                                             | 18.11 | 29.88      | 23.07      | 23.25                                                        | 17.23    | 19.43       | 21.13       | 28.05 |          |
|                                                                                  | Yes, my personality                                            | 5.18  | 3.71       | 9.4        | 5.81                                                         | 8.17     | 5.55        | 3.29        | 2.02  | <0.01    |
|                                                                                  | Yes, my vision of the society/ hor                             | 51.74 | 47.05      | 43.58      | 50.00                                                        | 50.98    | 51.86       | 52.4        | 46.36 |          |
|                                                                                  | Yes, my life                                                   | 24.95 | 19.24      | 23.93      | 20.93                                                        | 24.6     | 24.14       | 24.17       | 21.46 |          |
|                                                                                  | I do not know                                                  | 79.01 | 82.93      | 70.32      | 82.6                                                         | 75.00    | 76.77       | 79.62       | 88.72 |          |
| Presence of symptoms (since February)                                            | Yes, with a probable non-confirmed case                        | 10.16 | 9.01       | 16.48      | 5.79                                                         | 13.05    | 11.61       | 9.79        | 5.14  | <0.01    |
|                                                                                  | Yes, with a confirmed case                                     | 10.81 | 8.04       | 13.18      | 11.59                                                        | 11.93    | 11.61       | 10.58       | 6.12  |          |
|                                                                                  | No                                                             | 22.92 | 35.72      | 11.29      | 37.75                                                        | 15.55    | 20.98       | 28.09       | 46.06 |          |
|                                                                                  | Headache                                                       | 17.06 | 13.02      | 13.7       | 8.16                                                         | 17.59    | 18.01       | 16.29       | 10.81 |          |
|                                                                                  | Sore throat                                                    | 10.51 | 7.95       | 9.27       | 13.26                                                        | 10.81    | 10.59       | 9.47        | 7.96  |          |
| How did they feel when answering the questionnaire                               | Nasal congestion/running nose                                  | 9.1   | 9.37       | 10.68      | 12.24                                                        | 12.06    | 9.05        | 8.28        | 6.3   |          |
|                                                                                  | Extreme fatigue/bradness                                       | 7.47  | 5.30       | 10.48      | 4.08                                                         | 7.92     | 7.57        | 6.76        | 4.77  |          |
|                                                                                  | Persistent cough (for one week or more)                        | 6.96  | 6.50       | 6.85       | 7.14                                                         | 6.71     | 6.94        | 6.92        | 6.81  |          |
|                                                                                  | Muscle pain                                                    | 6.55  | 5.15       | 8.87       | 4.08                                                         | 6.54     | 6.78        | 6.43        | 4.67  |          |
|                                                                                  | Diarrhea                                                       | 5.37  | 5.32       | 8.46       | 6.12                                                         | 6.74     | 5.63        | 5.06        | 3.36  |          |
| Use of healthcare resources put in place in the context of the COVID-19 pandemic | Dizziness                                                      | 3.14  | 1.95       | 8.06       | 2.04                                                         | 3.92     | 2.97        | 2.53        | 1.54  |          |
|                                                                                  | Shortness of breath                                            | 2.27  | 1.95       | 3.62       | 2.04                                                         | 2.08     | 2.18        | 1.88        | 1.19  |          |
|                                                                                  | Chest pain                                                     | 1.96  | 1.74       | 1.2        | 2.04                                                         | 2.38     | 2.28        | 1.71        | 0.93  |          |
|                                                                                  | Loss of smell, smell blindness                                 | 1.93  | 1.66       | 2.41       | 1.02                                                         | 2.15     | 2.05        | 1.76        | 1.31  |          |
|                                                                                  | Persistent fever (for one week or more)                        | 1.58  | 1.79       | 2.41       | 0.00                                                         | 1.5      | 1.5         | 1.83        | 1.76  |          |
| Fear of working with COVID-19 patients                                           | Loss of appetite/weight                                        | 1.38  | 1.10       | 2.01       | 0.00                                                         | 1.38     | 1.3         | 1.26        | 1.28  |          |
|                                                                                  | Loss of taste                                                  | 1.74  | 1.42       | 1.2        | 0.00                                                         | 1.7      |             |             |       |          |
